# Supplementary material for: HOXA9 inhibits HIF-1α-mediated glycolysis through interacting with CRIP2 to repress cutaneous squamous cell carcinoma development
Source: PubMed Central journal article supplement (PMC5902613; doi:10.1038/s41467-018-03914-5), 2018-04-16
Supplement: 41467_2018_3914_MOESM1_ESM.pdf [file 41467_2018_3914_MOESM1_ESM.pdf]

Supplementary Information

**HOXA9 Inhibits HIF-1 $\alpha$ -Mediated Glycolysis  
through Interacting with CRIP2 to Repress  
Cutaneous Squamous Cell Carcinoma  
Development**

Zhou, et.al.

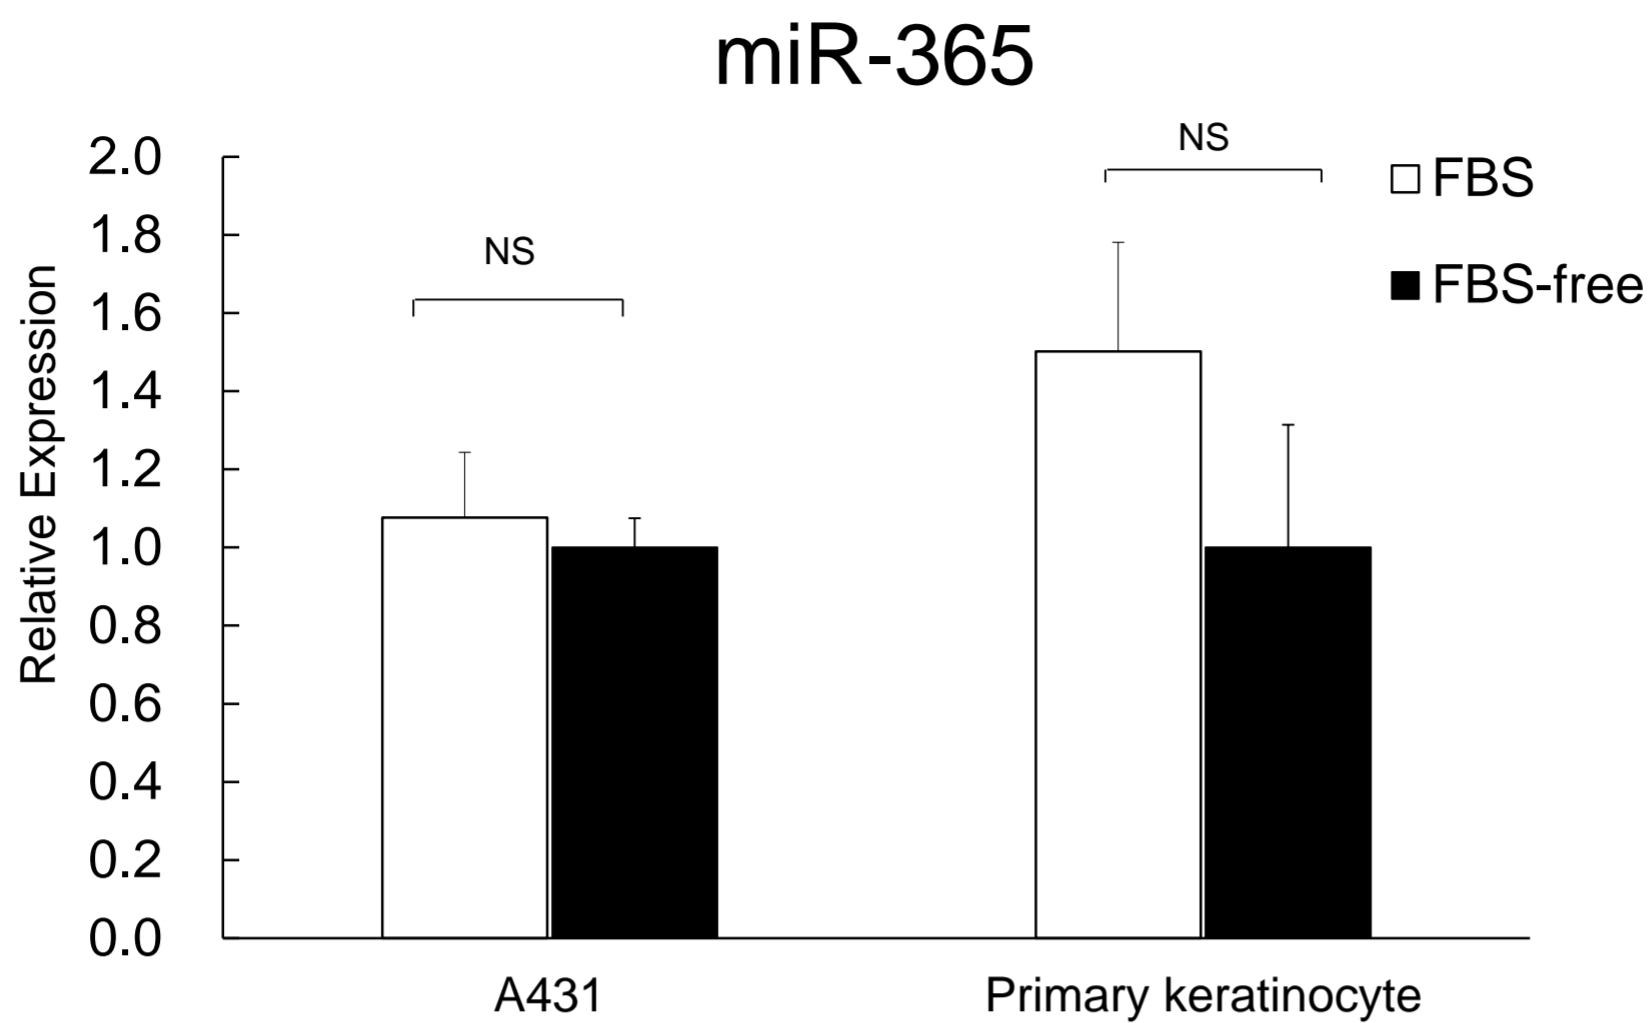

**Supplementary Figure 1. Verification of miR-365 expression in response to the presence of FBS.** No significant difference of the miR-365 expression levels between serum-free group and serum-containing group could be detected by qRT-PCR in both of the A431 cells and primary keratinocytes. NS, no significant difference. Each experiment was performed at least in triplicate and data are presented as mean  $\pm$  s.d. One-Way ANOVA and Dunnett's multiple comparison test were used to analyze the data (\* $P < 0.05$ , \*\* $P < 0.01$ , \*\*\* $P < 0.001$ ).

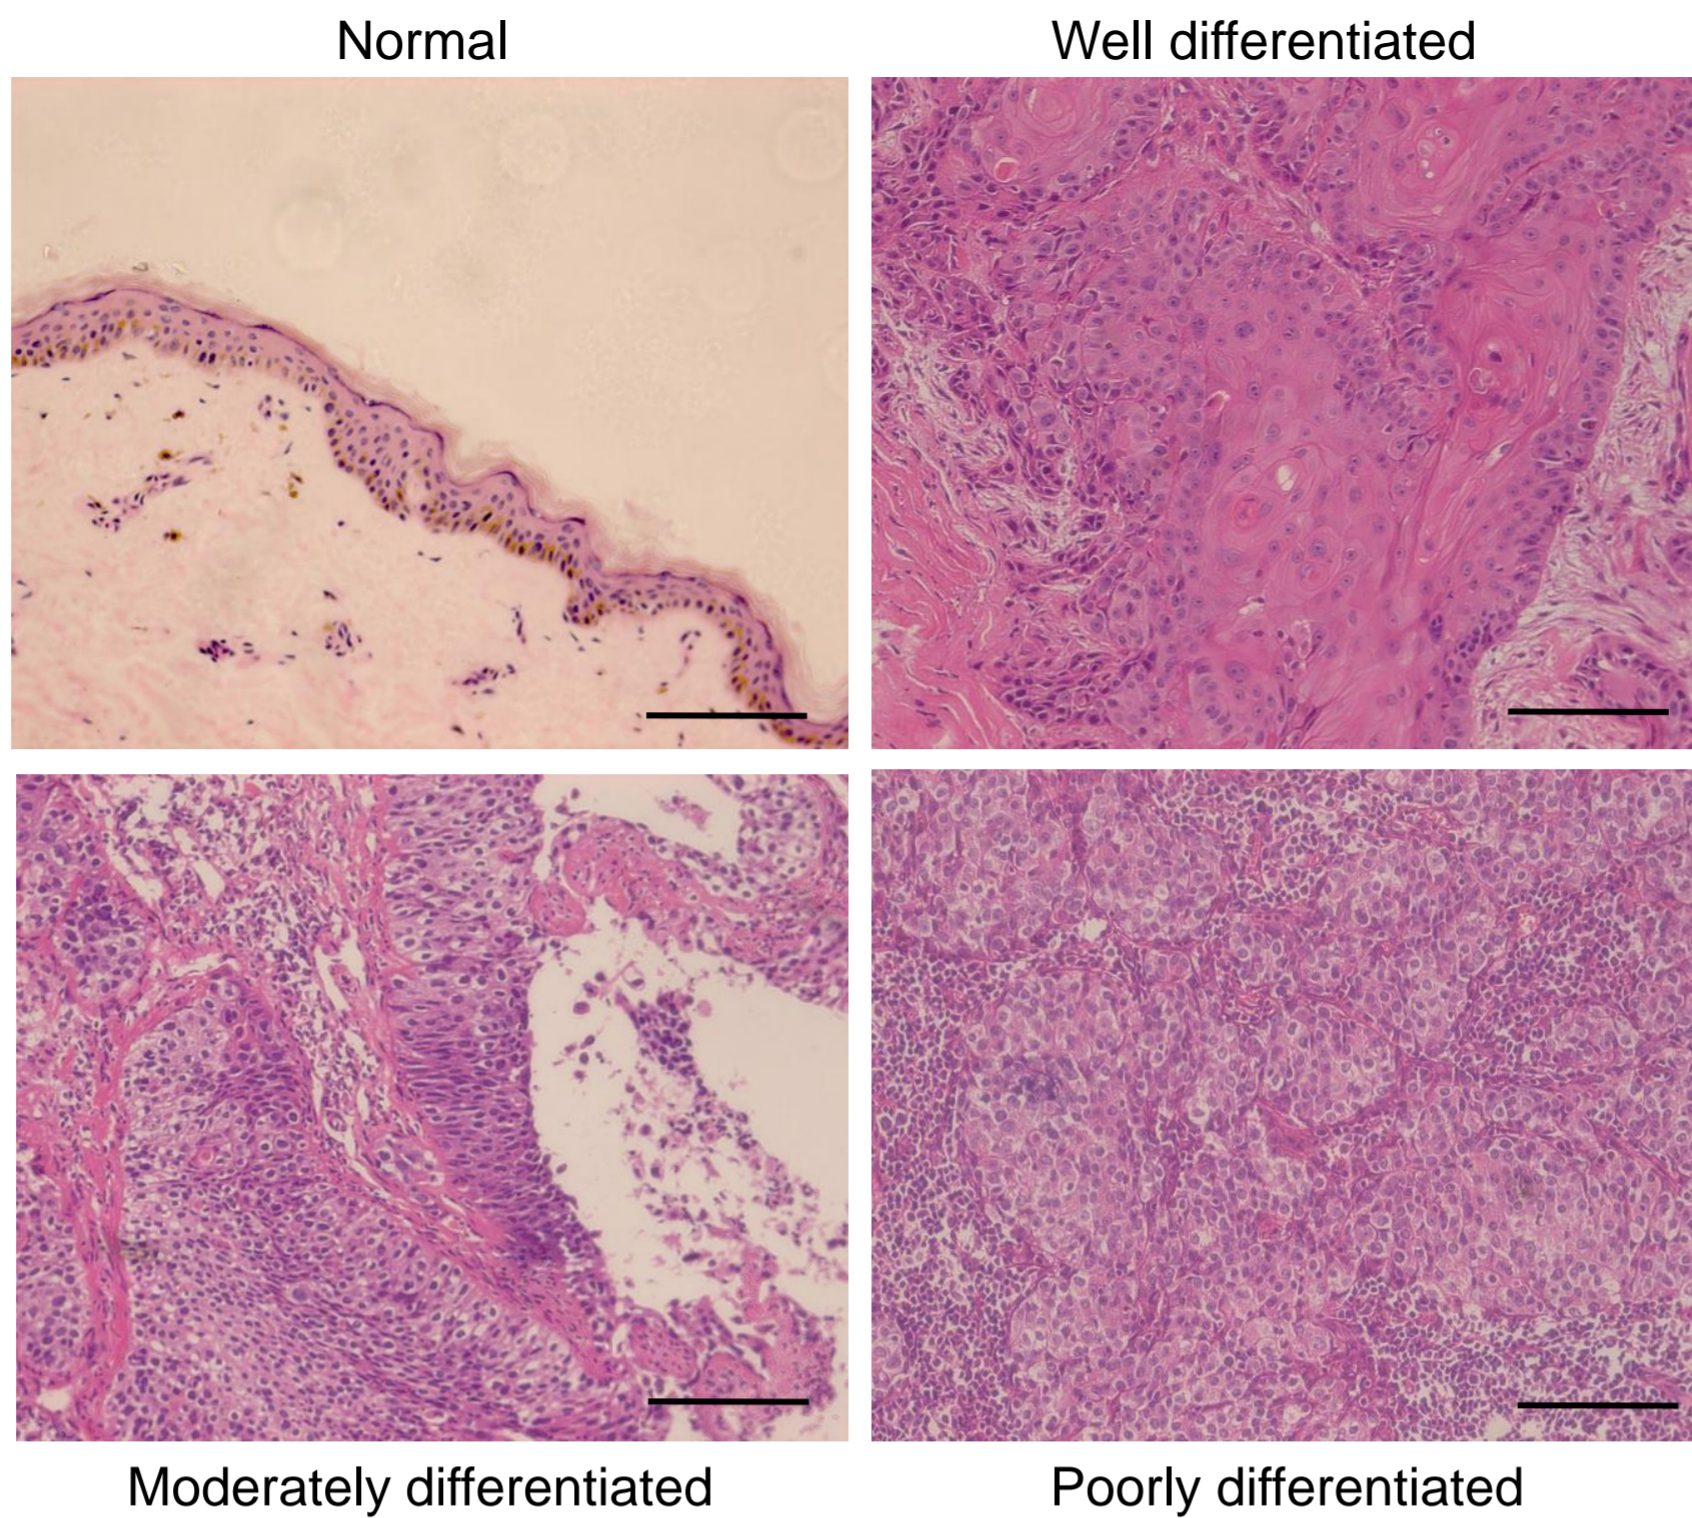

**Supplementary Figure 2. Hematoxylin and eosin (H & E) staining on paraffin sections of cSCC tumors and normal skin specimens.** Representative images indicating pathological cSCC tumor grades were shown: grade I (well differentiated), grade II (moderately differentiated) and grades III and IV (poorly differentiated). Scale bar, 100  $\mu$ m. Each experiment was performed at least in triplicate.

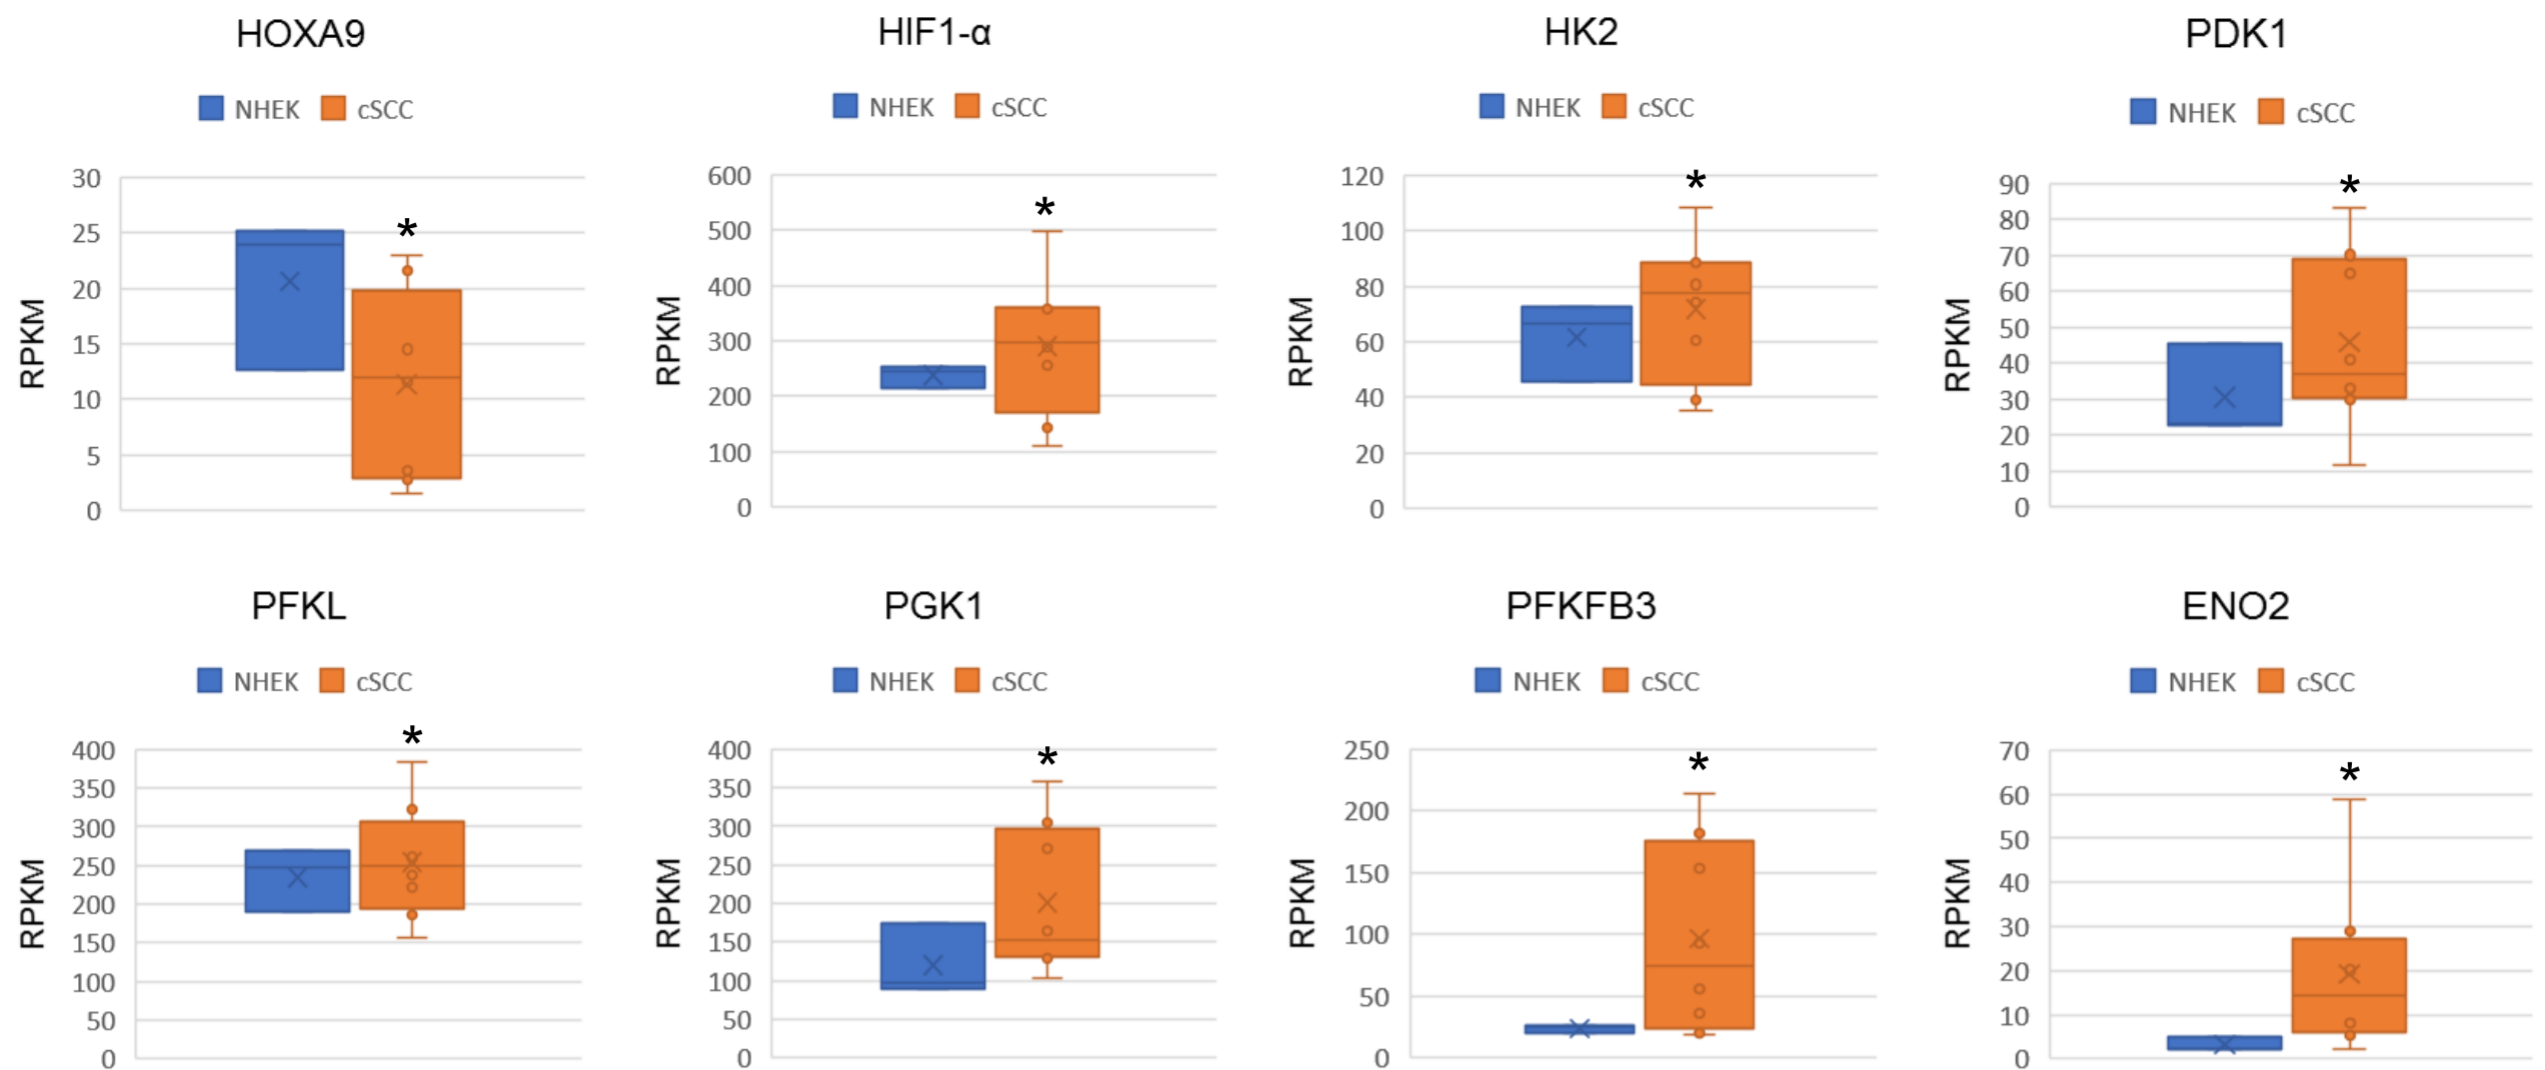

**Supplementary Figure 3. Gene expression levels (Reads Per Kilobase per Million mapped reads, RPKM) of HOXA9, HIF-1 $\alpha$  and its downstream glycolytic genes were compared between Normal Human Epidermal Keratinocytes (NHEK) (n=3) and cSCC tumors(n=8). Data are plotted as the means of 95% confidence interval  $\pm$  s.d. One-Way ANOVA and Dunnett's multiple comparison test were used to analyze the data (\* $P < 0.05$ , \*\* $P < 0.01$ , \*\*\* $P < 0.001$ ).**

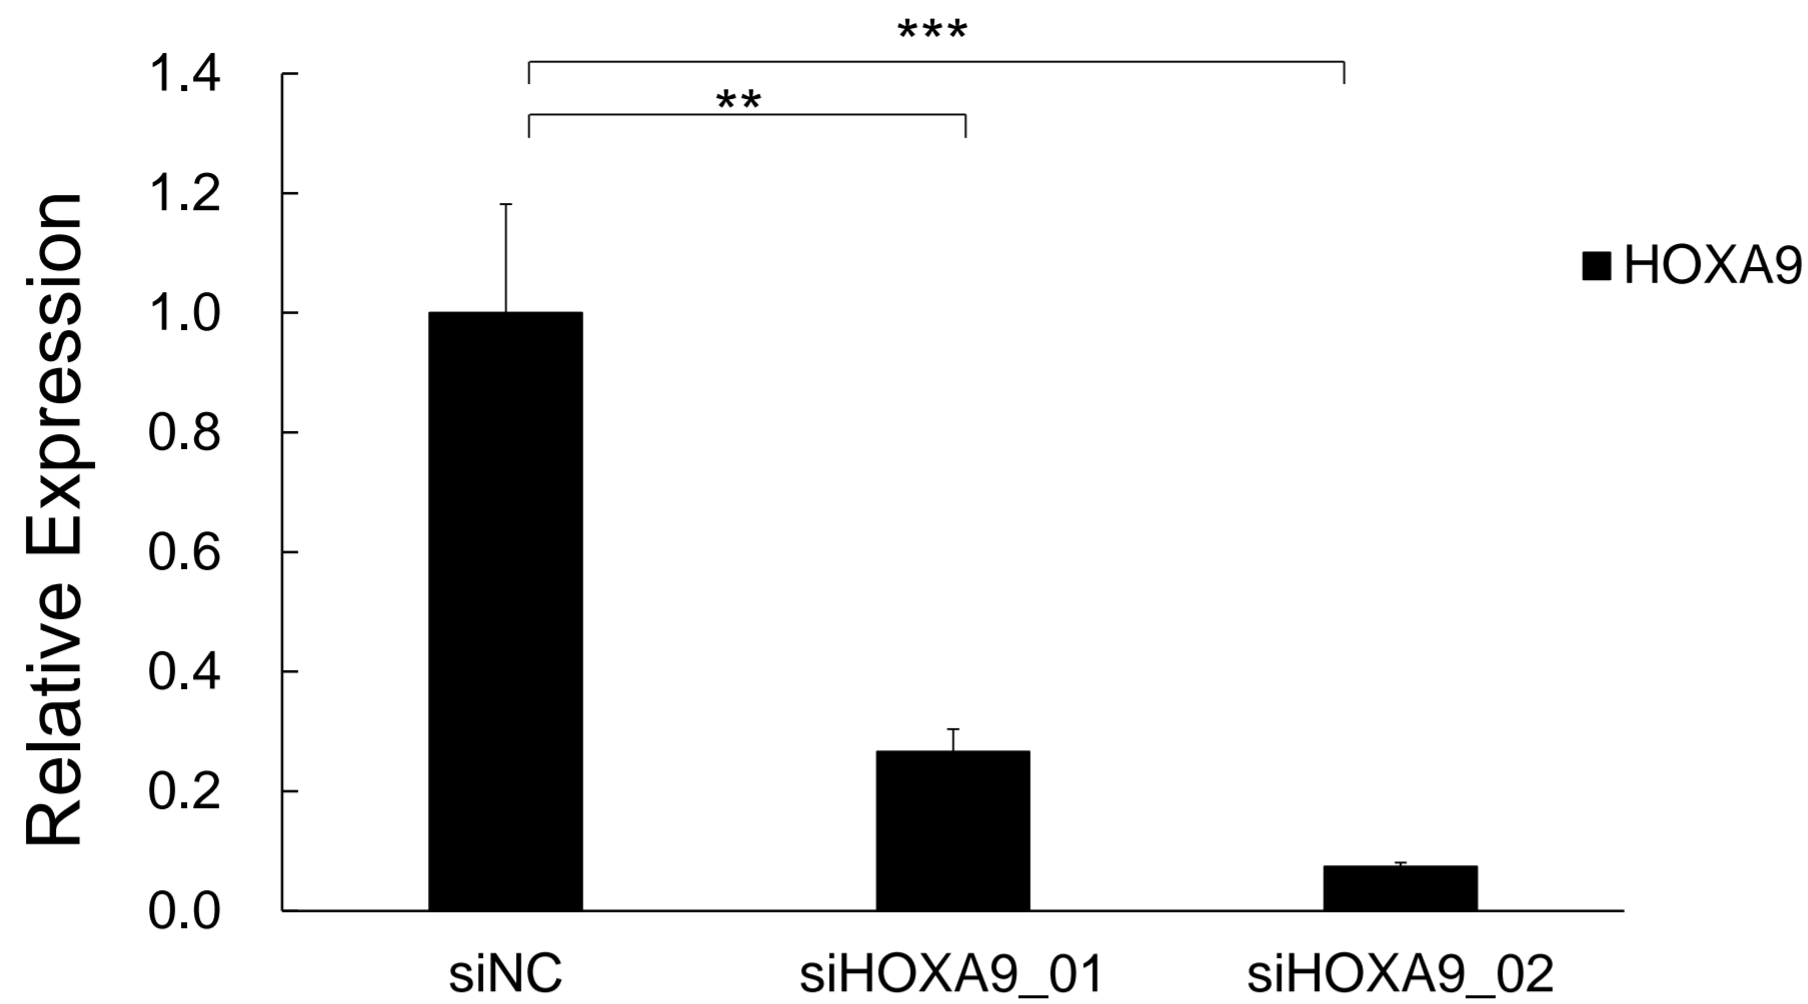

**Supplementary Figure 4. qRT-PCR was performed and *HOXA9* mRNA expression levels were detected after depletion of *HOXA9* by siRNAs in A431 cells. Significant loss of *HOXA9* mRNA expression can be observed. Each experiment was performed at least in triplicate and data are presented as mean  $\pm$  s.d. One-Way ANOVA and Dunnett's multiple comparison test were used to analyze the data ( $*P < 0.05$ ,  $**P < 0.01$ ,  $***P < 0.001$ ).**

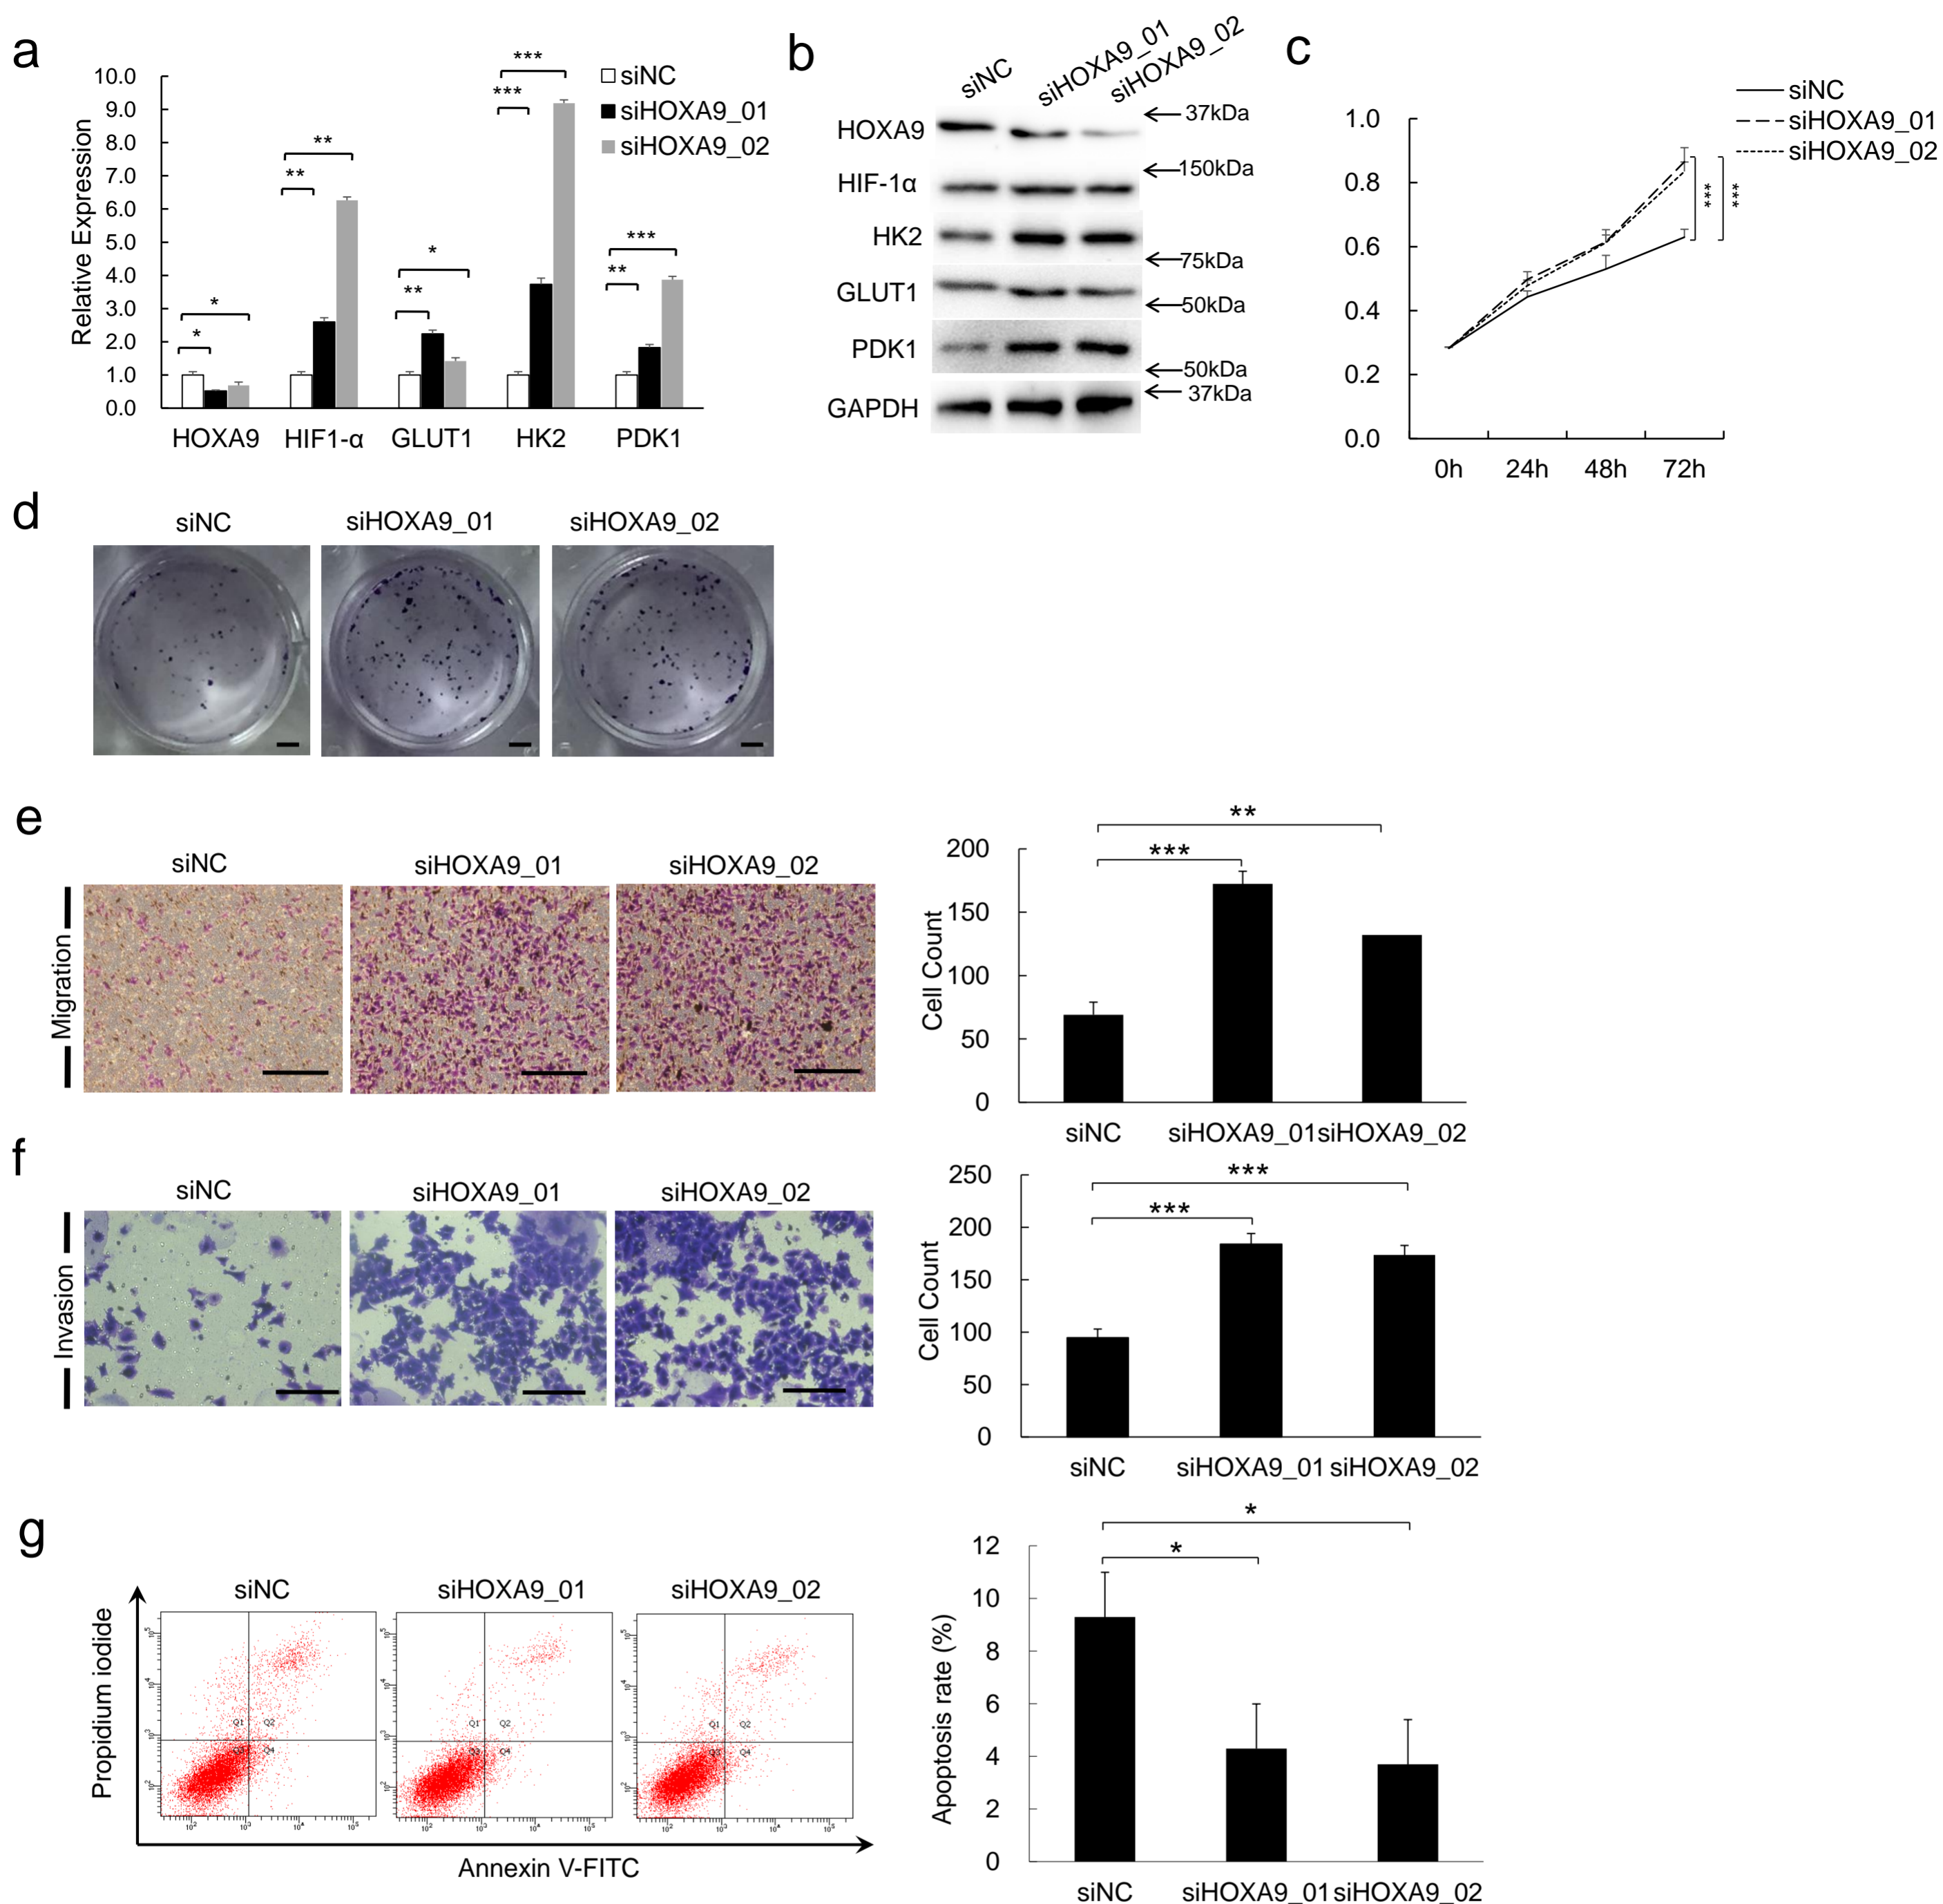

**Supplementary Figure 5. Loss of HOXA9 promotes cell proliferation, migration, and invasiveness, but represses apoptosis in HSC-1 cells.** (a,b) HOXA9 mRNA and protein expression was detected after depletion of HOXA9 by siRNAs in HSC-1 cells. Measurements of cell proliferation by CCK-8 assay (c), colony formation assay (d), transwell migration assay (e), Matrigel invasiveness measurement (f), and apoptosis assay by Annexin V/PI double staining (g) were performed in HSC-1 cells treated with siRNAs targeting HOXA9. In (d), scale bar : 1cm. In (e) and (f), scale bar: 100  $\mu$ m. Each experiment was performed at least in triplicate and data are presented as mean  $\pm$  s.d. One-Way ANOVA and Dunnett's multiple comparison test were used to analyze the data (\* $P < 0.05$ , \*\* $P < 0.01$ , \*\*\* $P < 0.001$ ).

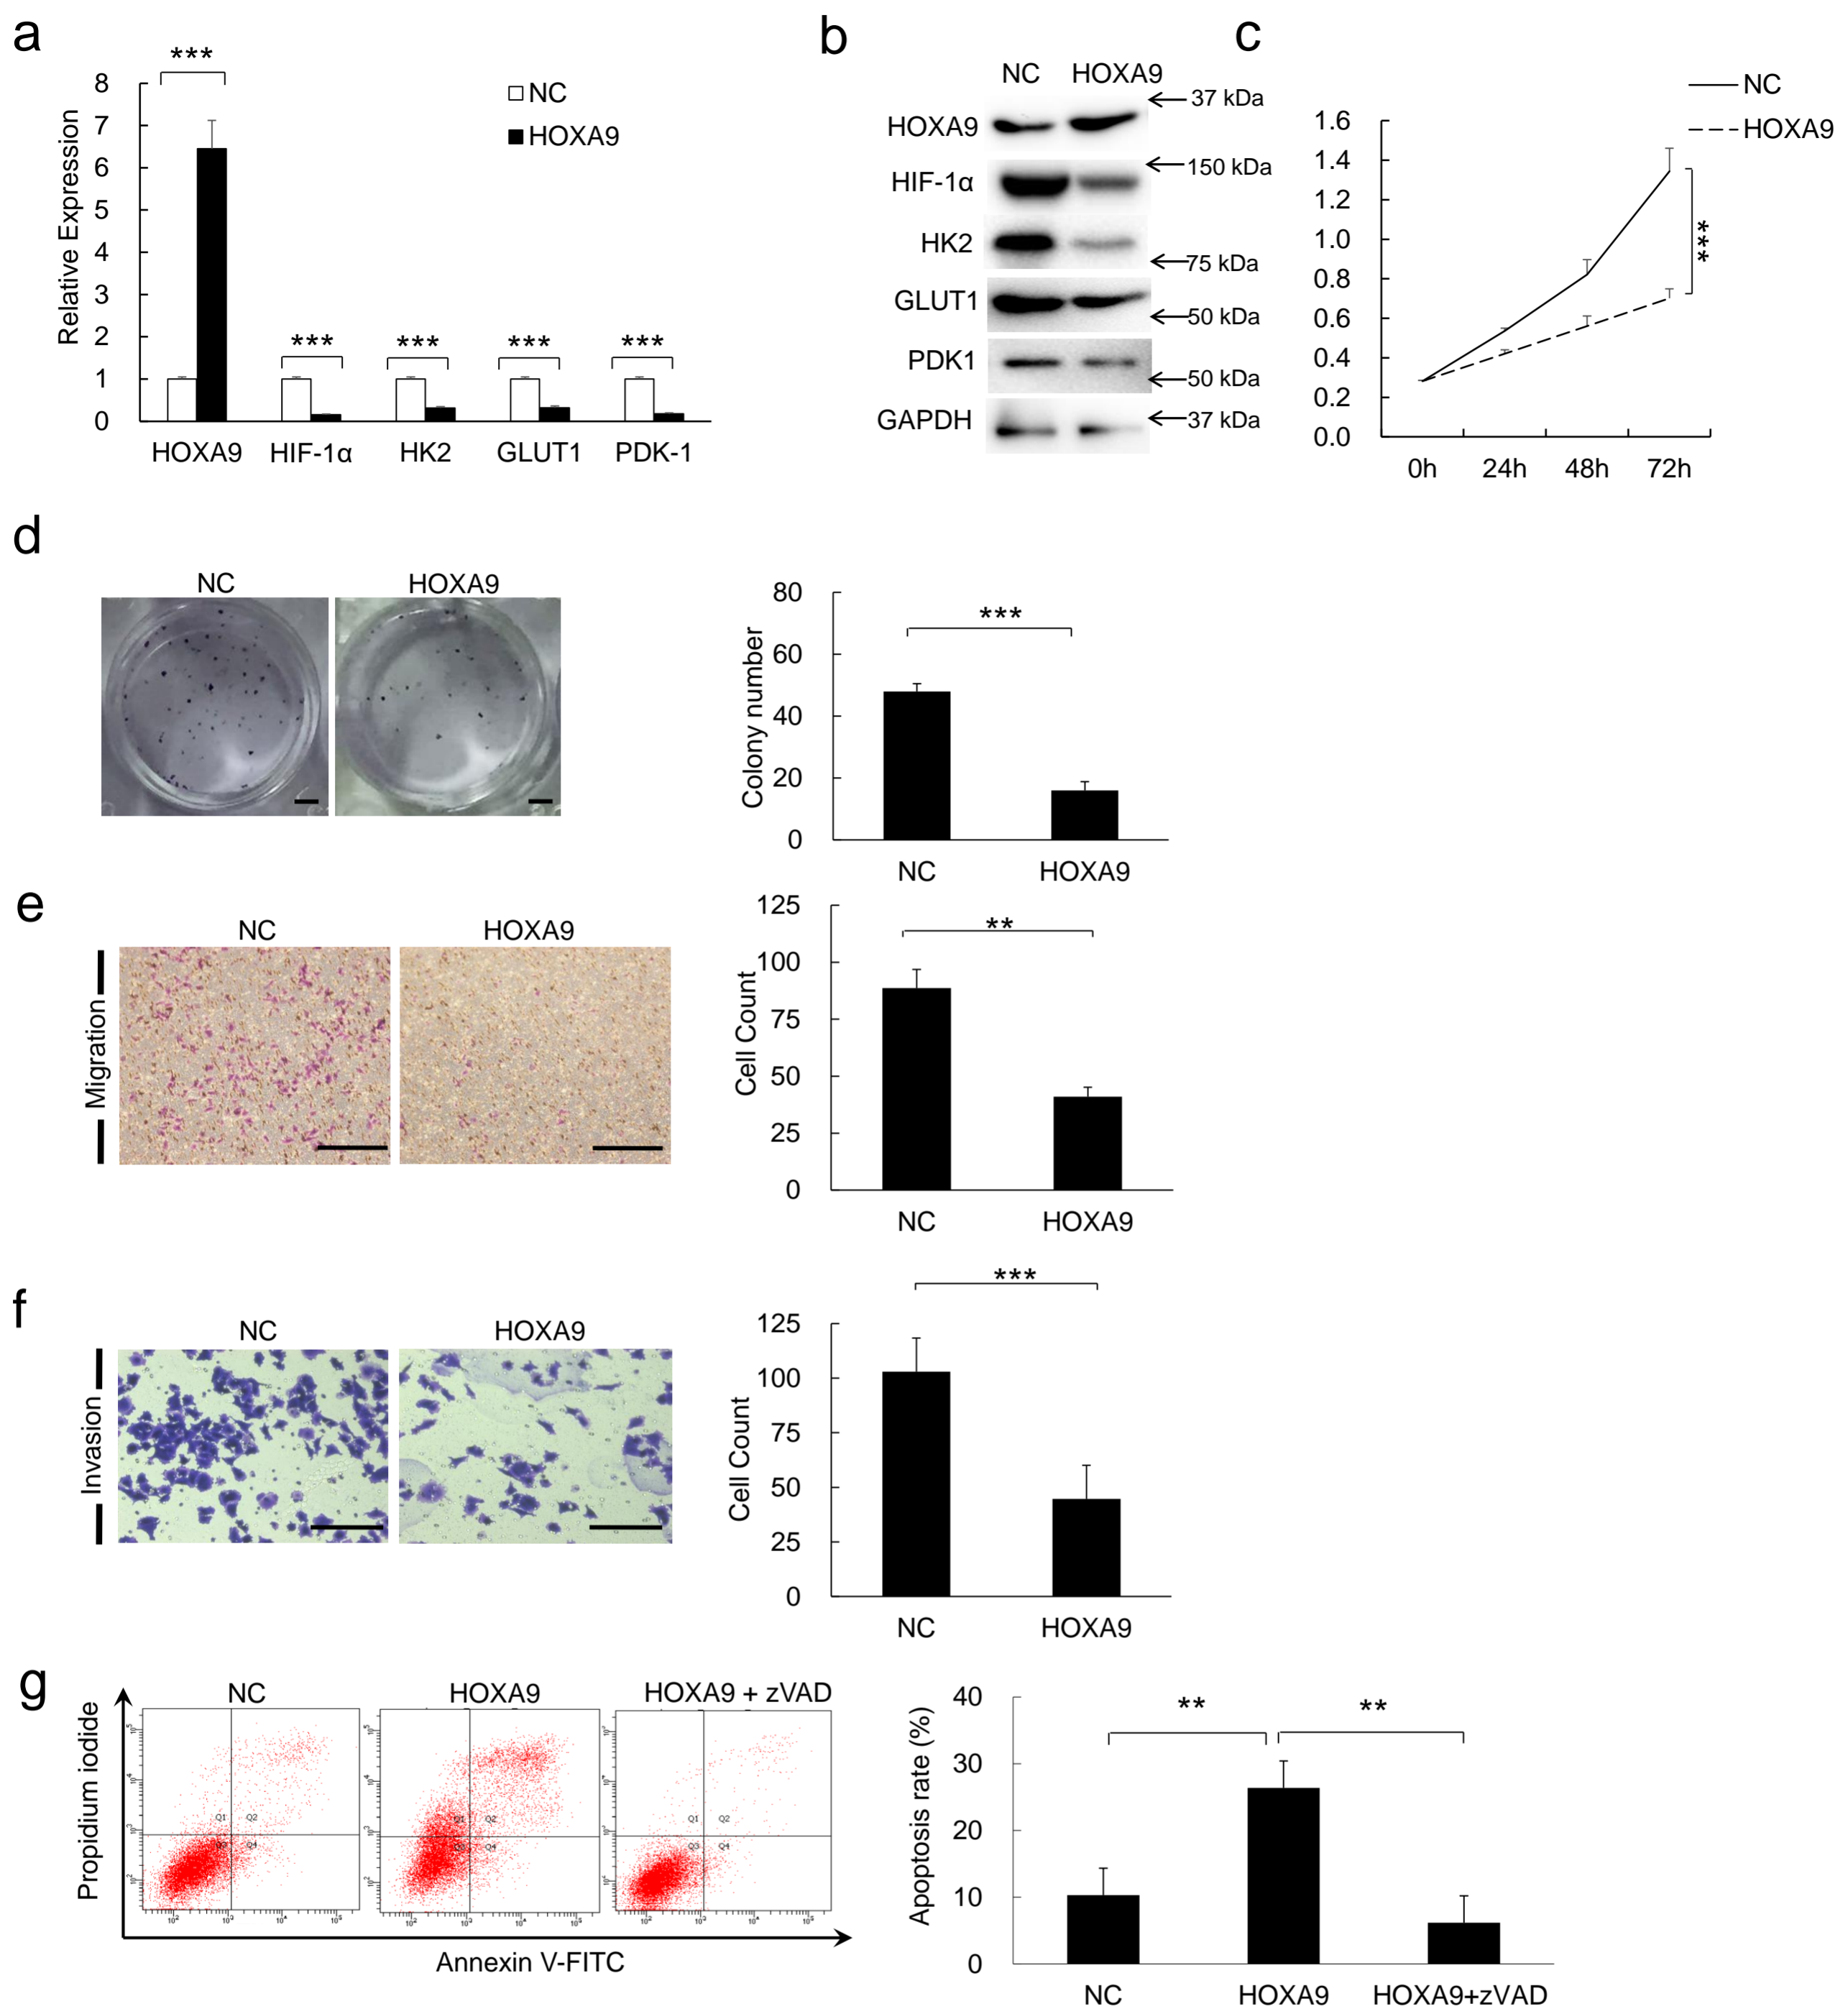

**Supplementary Figure 6. HOXA9 represses cell proliferation, migration, and invasiveness, but promotes apoptosis in HSC-1 cells.** (a,b) HOXA9 mRNA and protein expression was detected by qRT-PCR or western blot after overexpression of HOXA9 in HSC-1 cells. Measurements of cell proliferation by CCK-8 assay (c), colony formation assay (d), transwell migration assay (e), Matrigel invasiveness measurement (f), and apoptosis assay by Annexin V/PI double staining (g) were performed in HSC-1 cells overexpressing HOXA9. In (g), zVAD treatment was performed after HOXA9 overexpression to check the variation of apoptosis. In (d), scale bar : 1cm. In (e) and (f), scale bar: 100  $\mu$ m. Each experiment was performed at least in triplicate and data are presented as mean  $\pm$  s.d. One-Way ANOVA and Dunnett's multiple comparison test were used to analyze the data (\* $P < 0.05$ , \*\* $P < 0.01$ , \*\*\* $P < 0.001$ ).

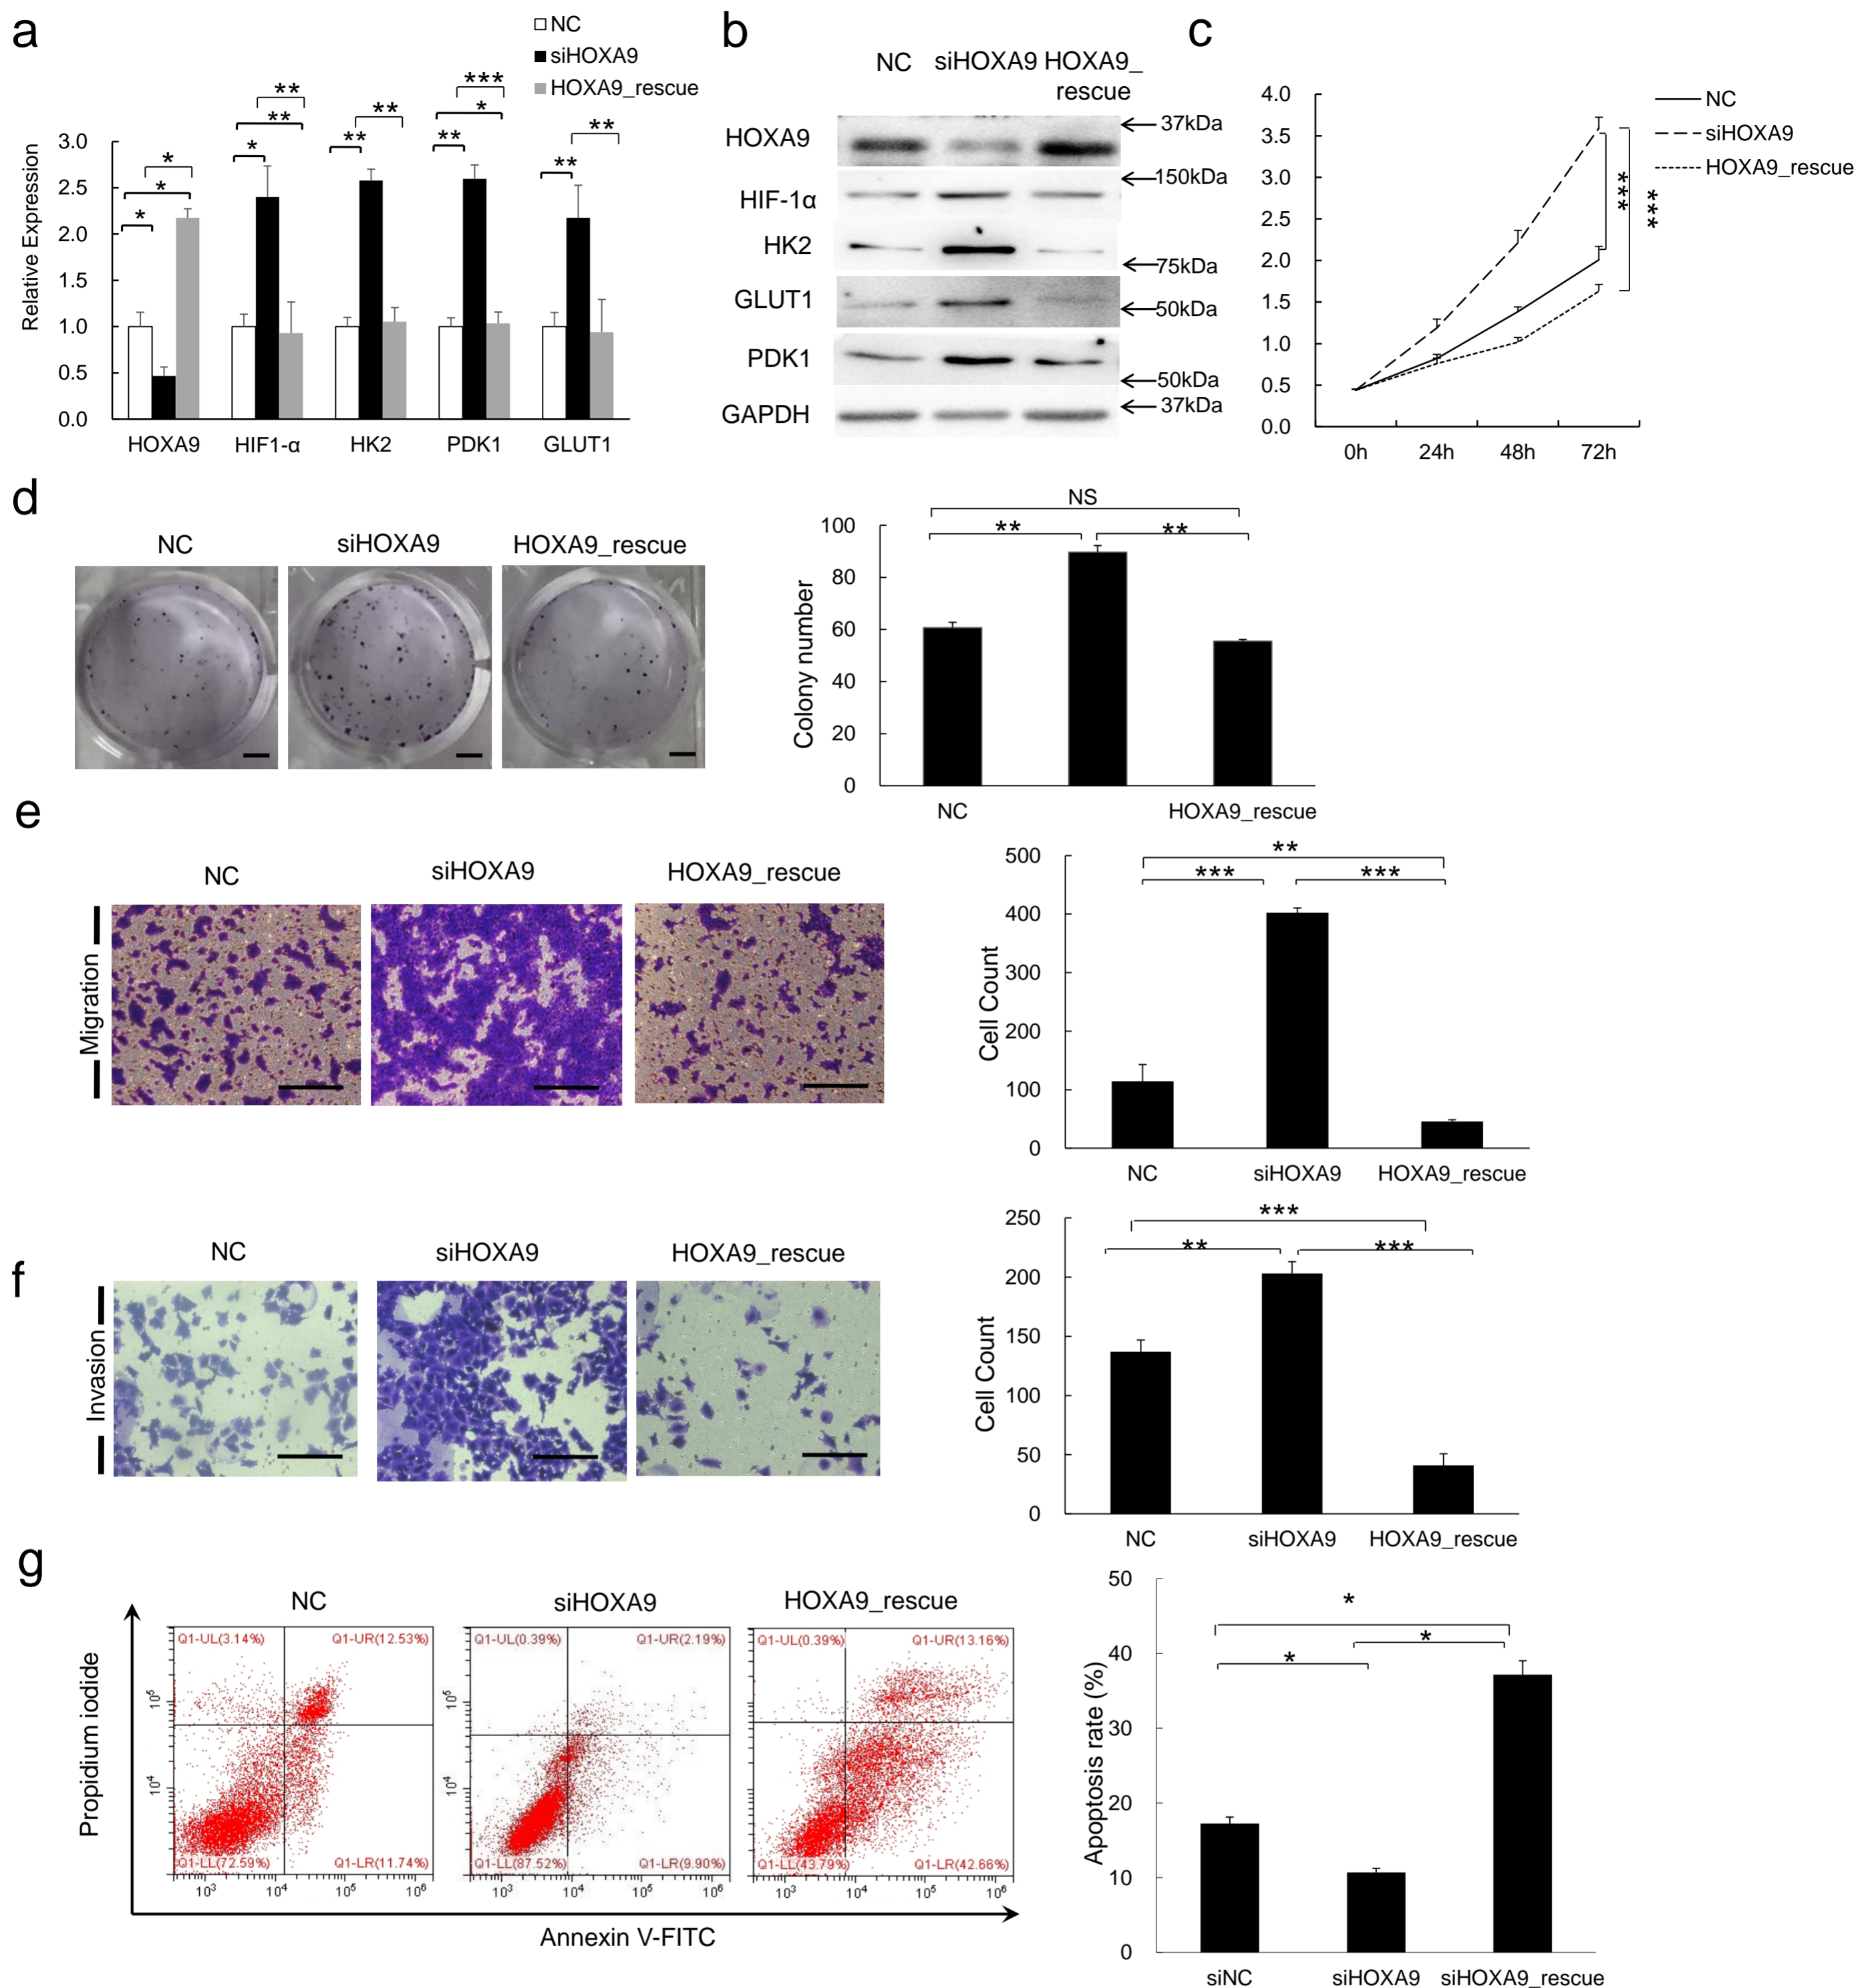

**Supplementary Figure 7. Rescue experiments by restoring HOXA9 expression after HOXA9 depletion to verify the tumor-suppressive role of HOXA9.** (a,b) HOXA9 mRNA and protein expression was detected by qRT-PCR or western blot. HOXA9 rescue after HOXA9 knockdown re-inhibited the enhanced proliferation (c), colony formation (d), migration (e), invasion (f), and upregulated expression of HIF-1 $\alpha$  and its downstream glycolytic genes (a,b) caused by HOXA9 knockdown and re-promoted the apoptosis (g). In (d), scale bar : 1cm. In (e) and (f), scale bar: 100  $\mu$ m. Each experiment was performed at least in triplicate and data are presented as mean  $\pm$  s.d. One-Way ANOVA and Dunnett's multiple comparison test were used to analyze the data (\* $P < 0.05$ , \*\* $P < 0.01$ , \*\*\* $P < 0.001$ ).



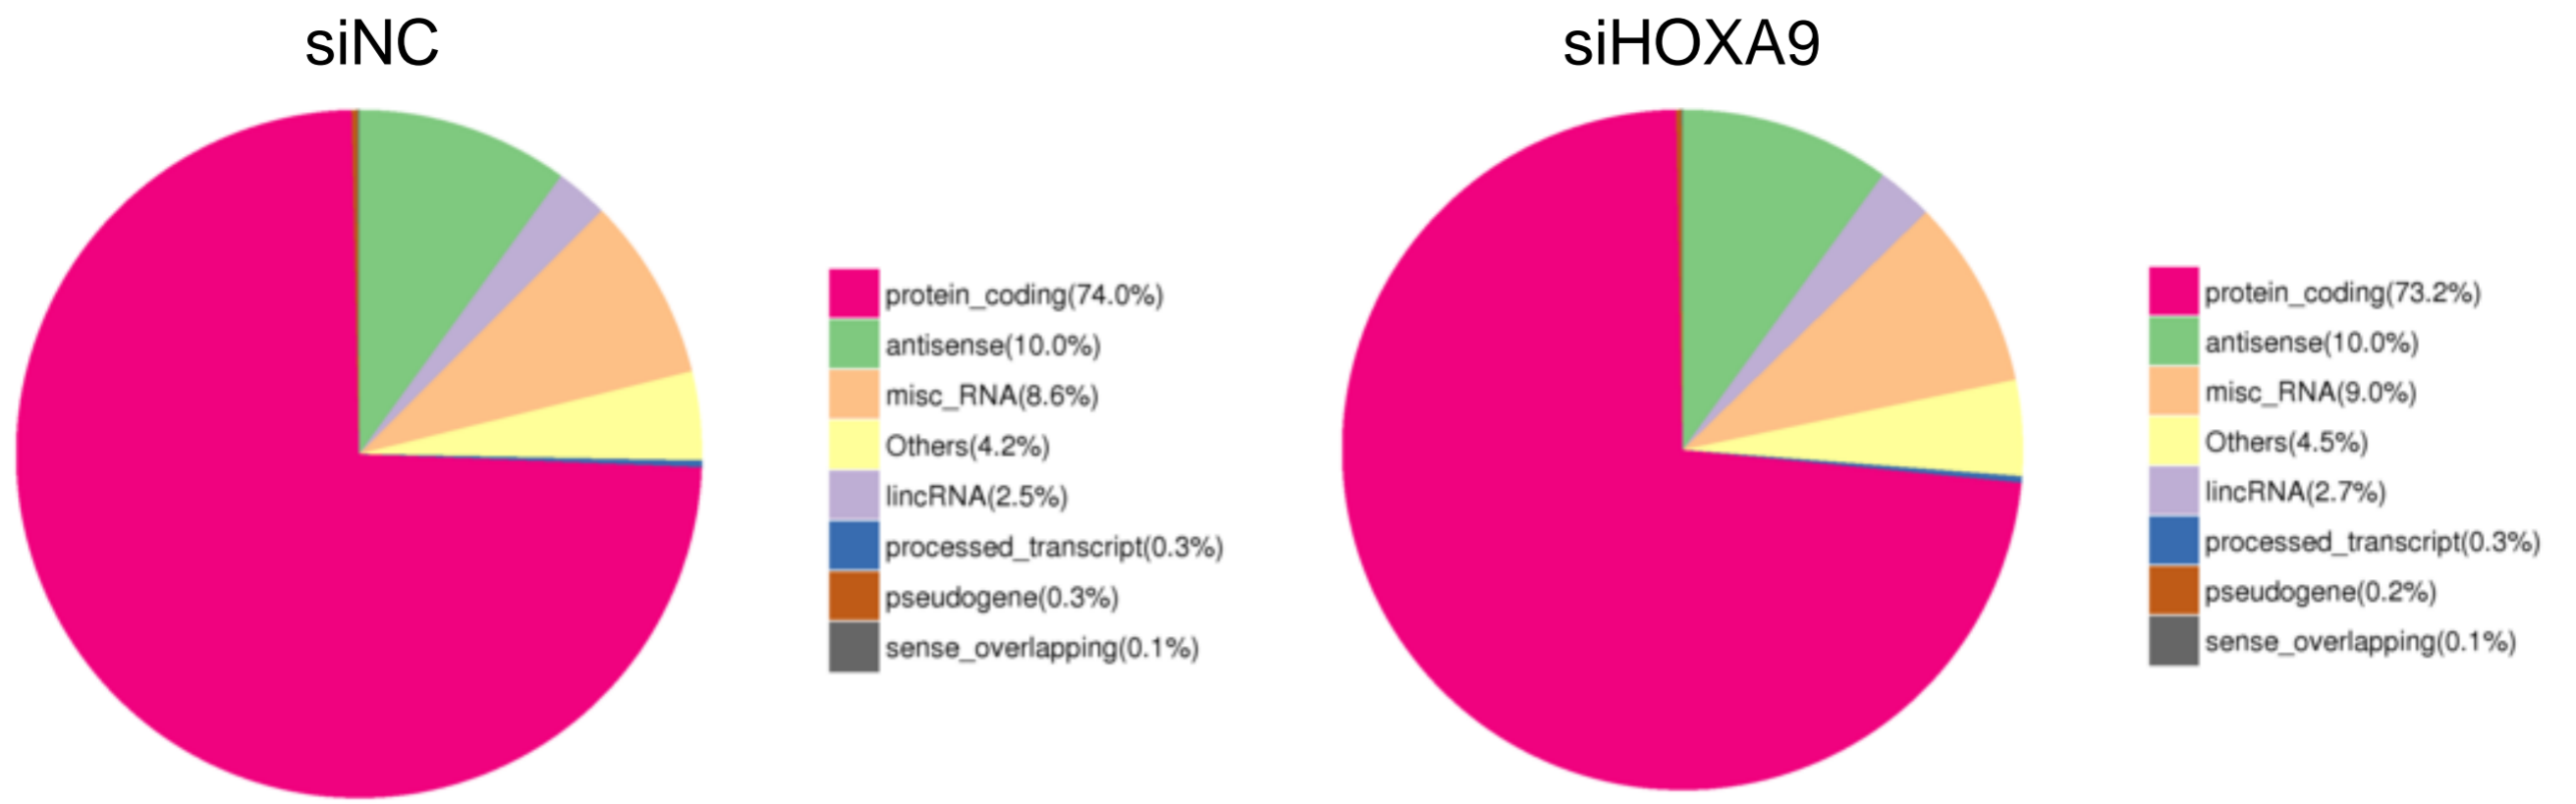

**Supplementary Figure 8. Classification of mapped reads from transcriptomic sequencing of siNC- or siHOXA9-treated A431 cells.**

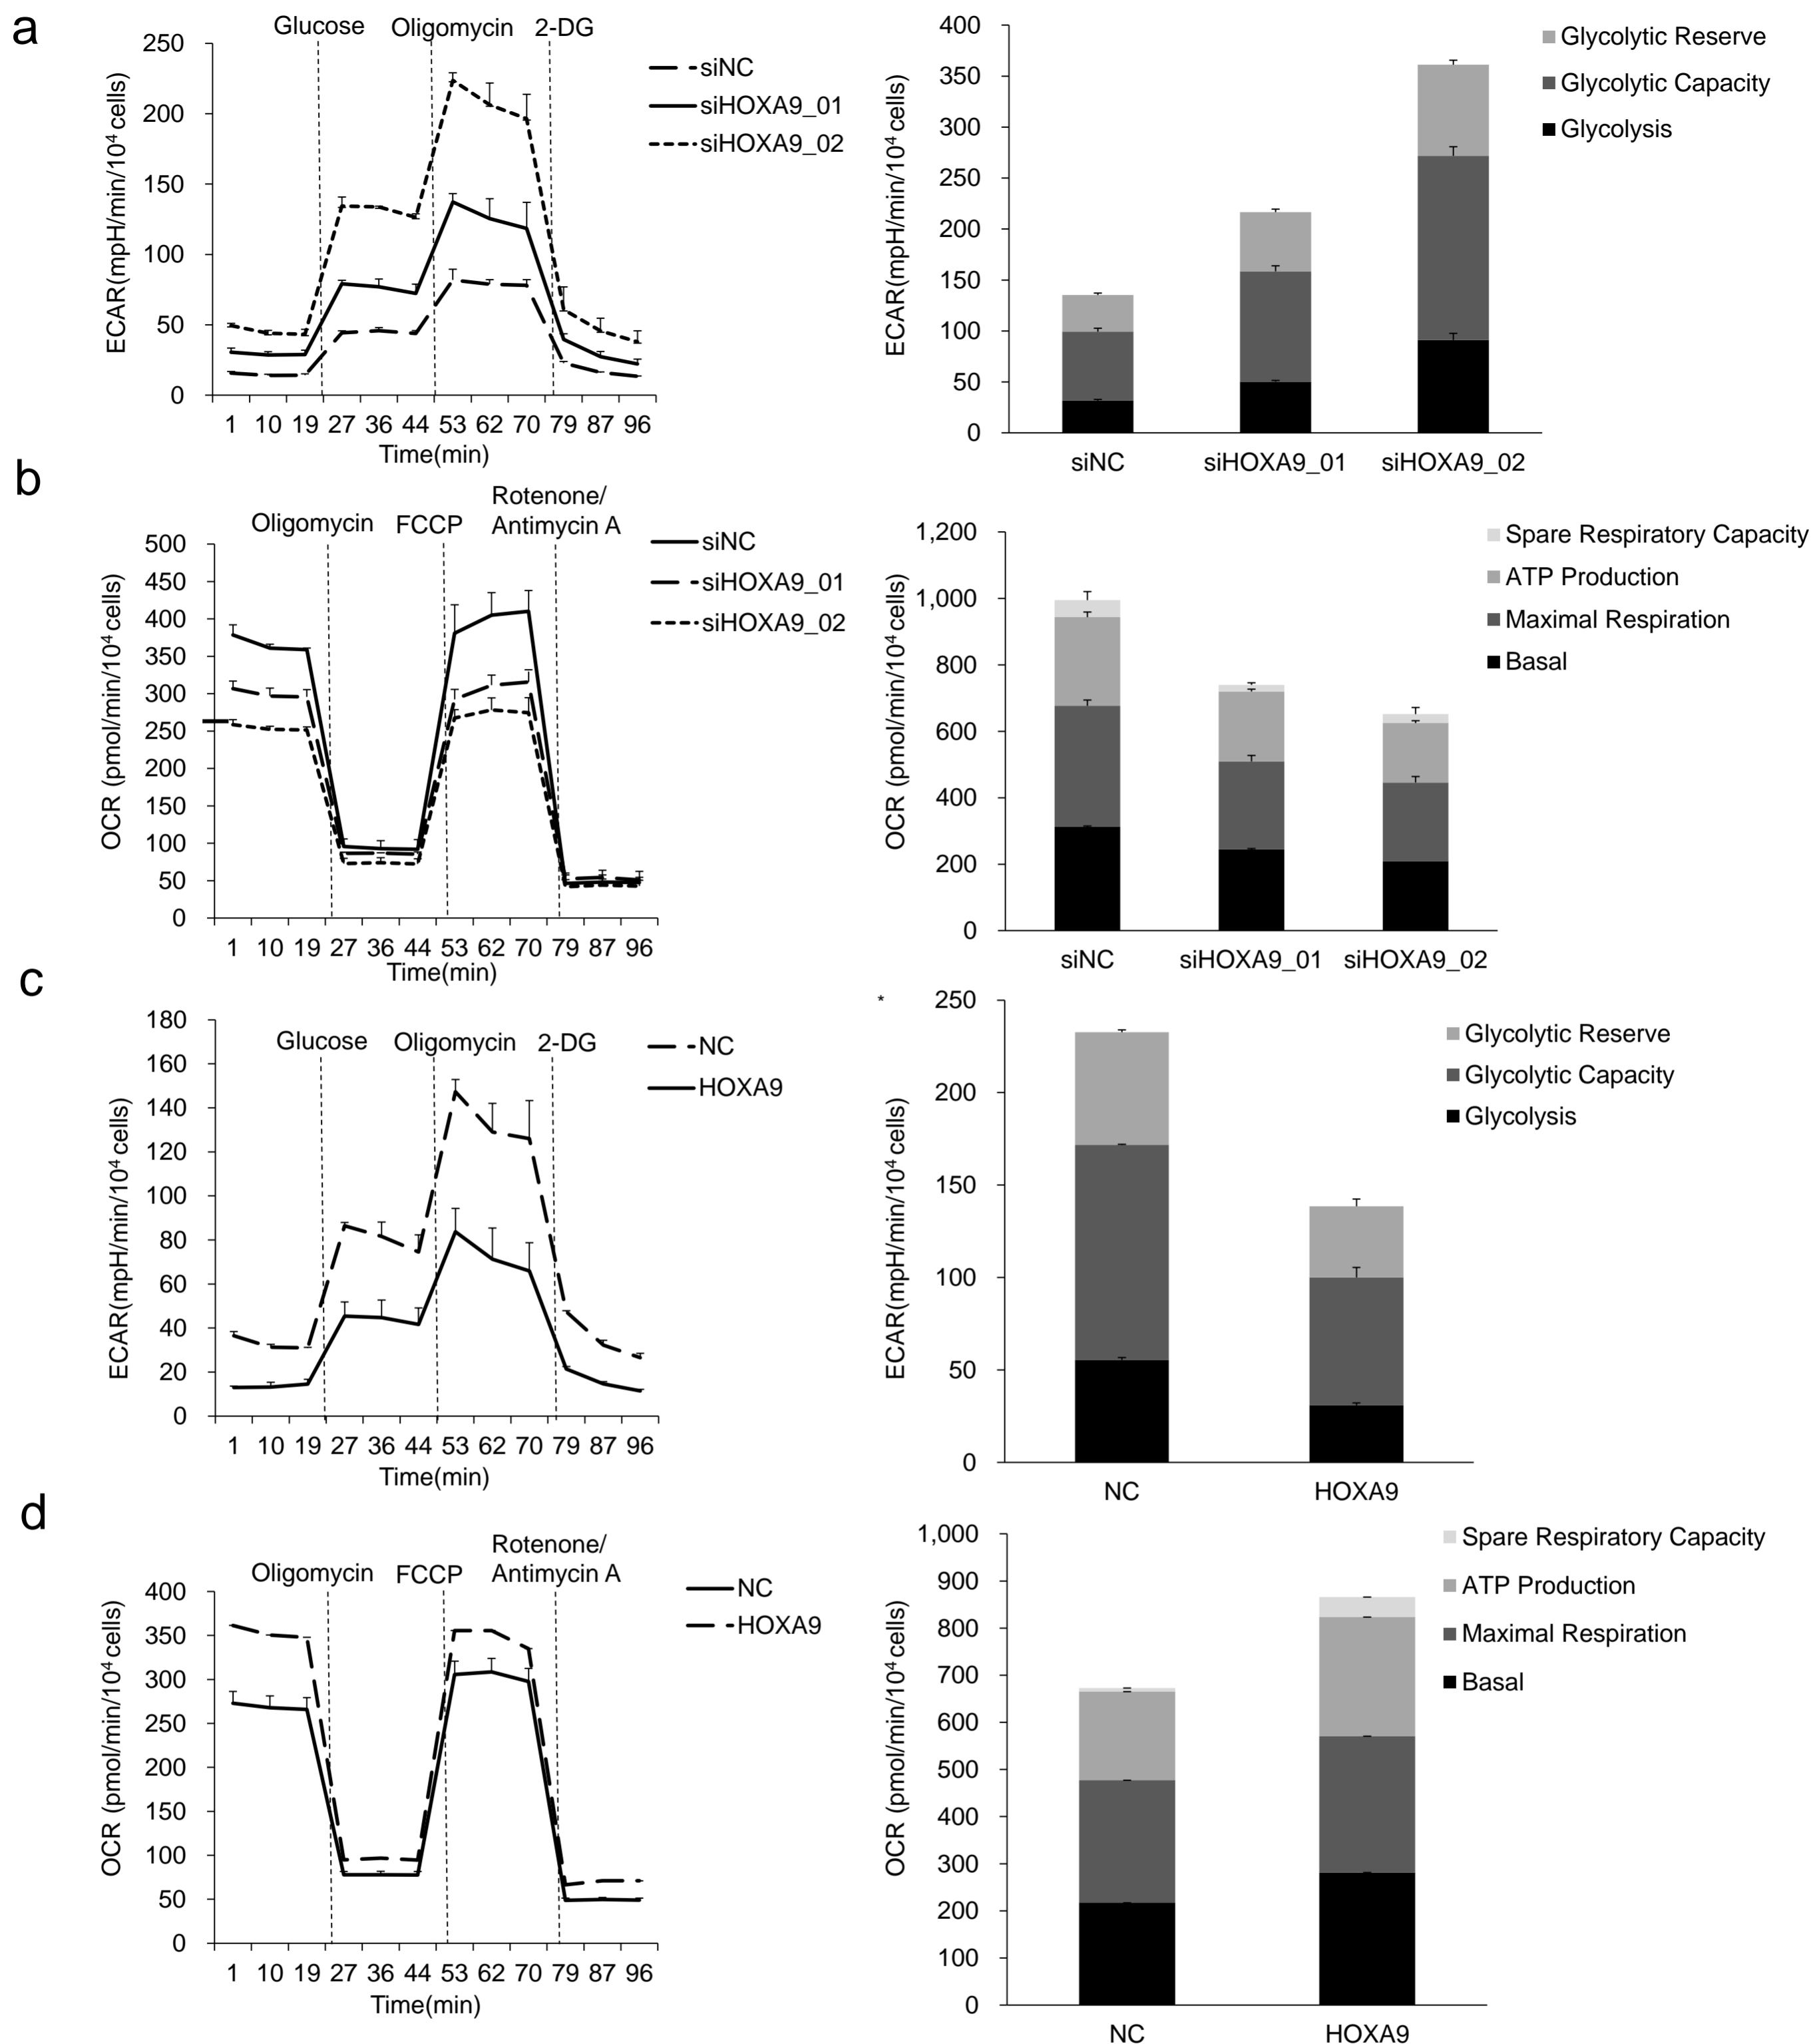

**Supplementary Figure 9. HOXA9 represses glycolysis and promotes oxidative phosphorylation in HSC-1 cells.** (a-d) Left panels: ECAR and OCR analysis of HSC-1 cells, in which HOXA9 was depleted using two siRNAs or overexpressed, followed by treatment with the indicated compounds; right panels: glycolytic variations (glycolysis, glycolytic capacity, and glycolytic reserve) or OXPHOS variations (basal, maximal respiration, ATP production, and spare respiratory capacity) were summarized from raw data. Each experiment was performed at least in triplicate and data are presented as mean  $\pm$  s.d. One-Way ANOVA and Dunnett's multiple comparison test were used to analyze the data (\* $P < 0.05$ , \*\* $P < 0.01$ , \*\*\* $P < 0.001$ ).

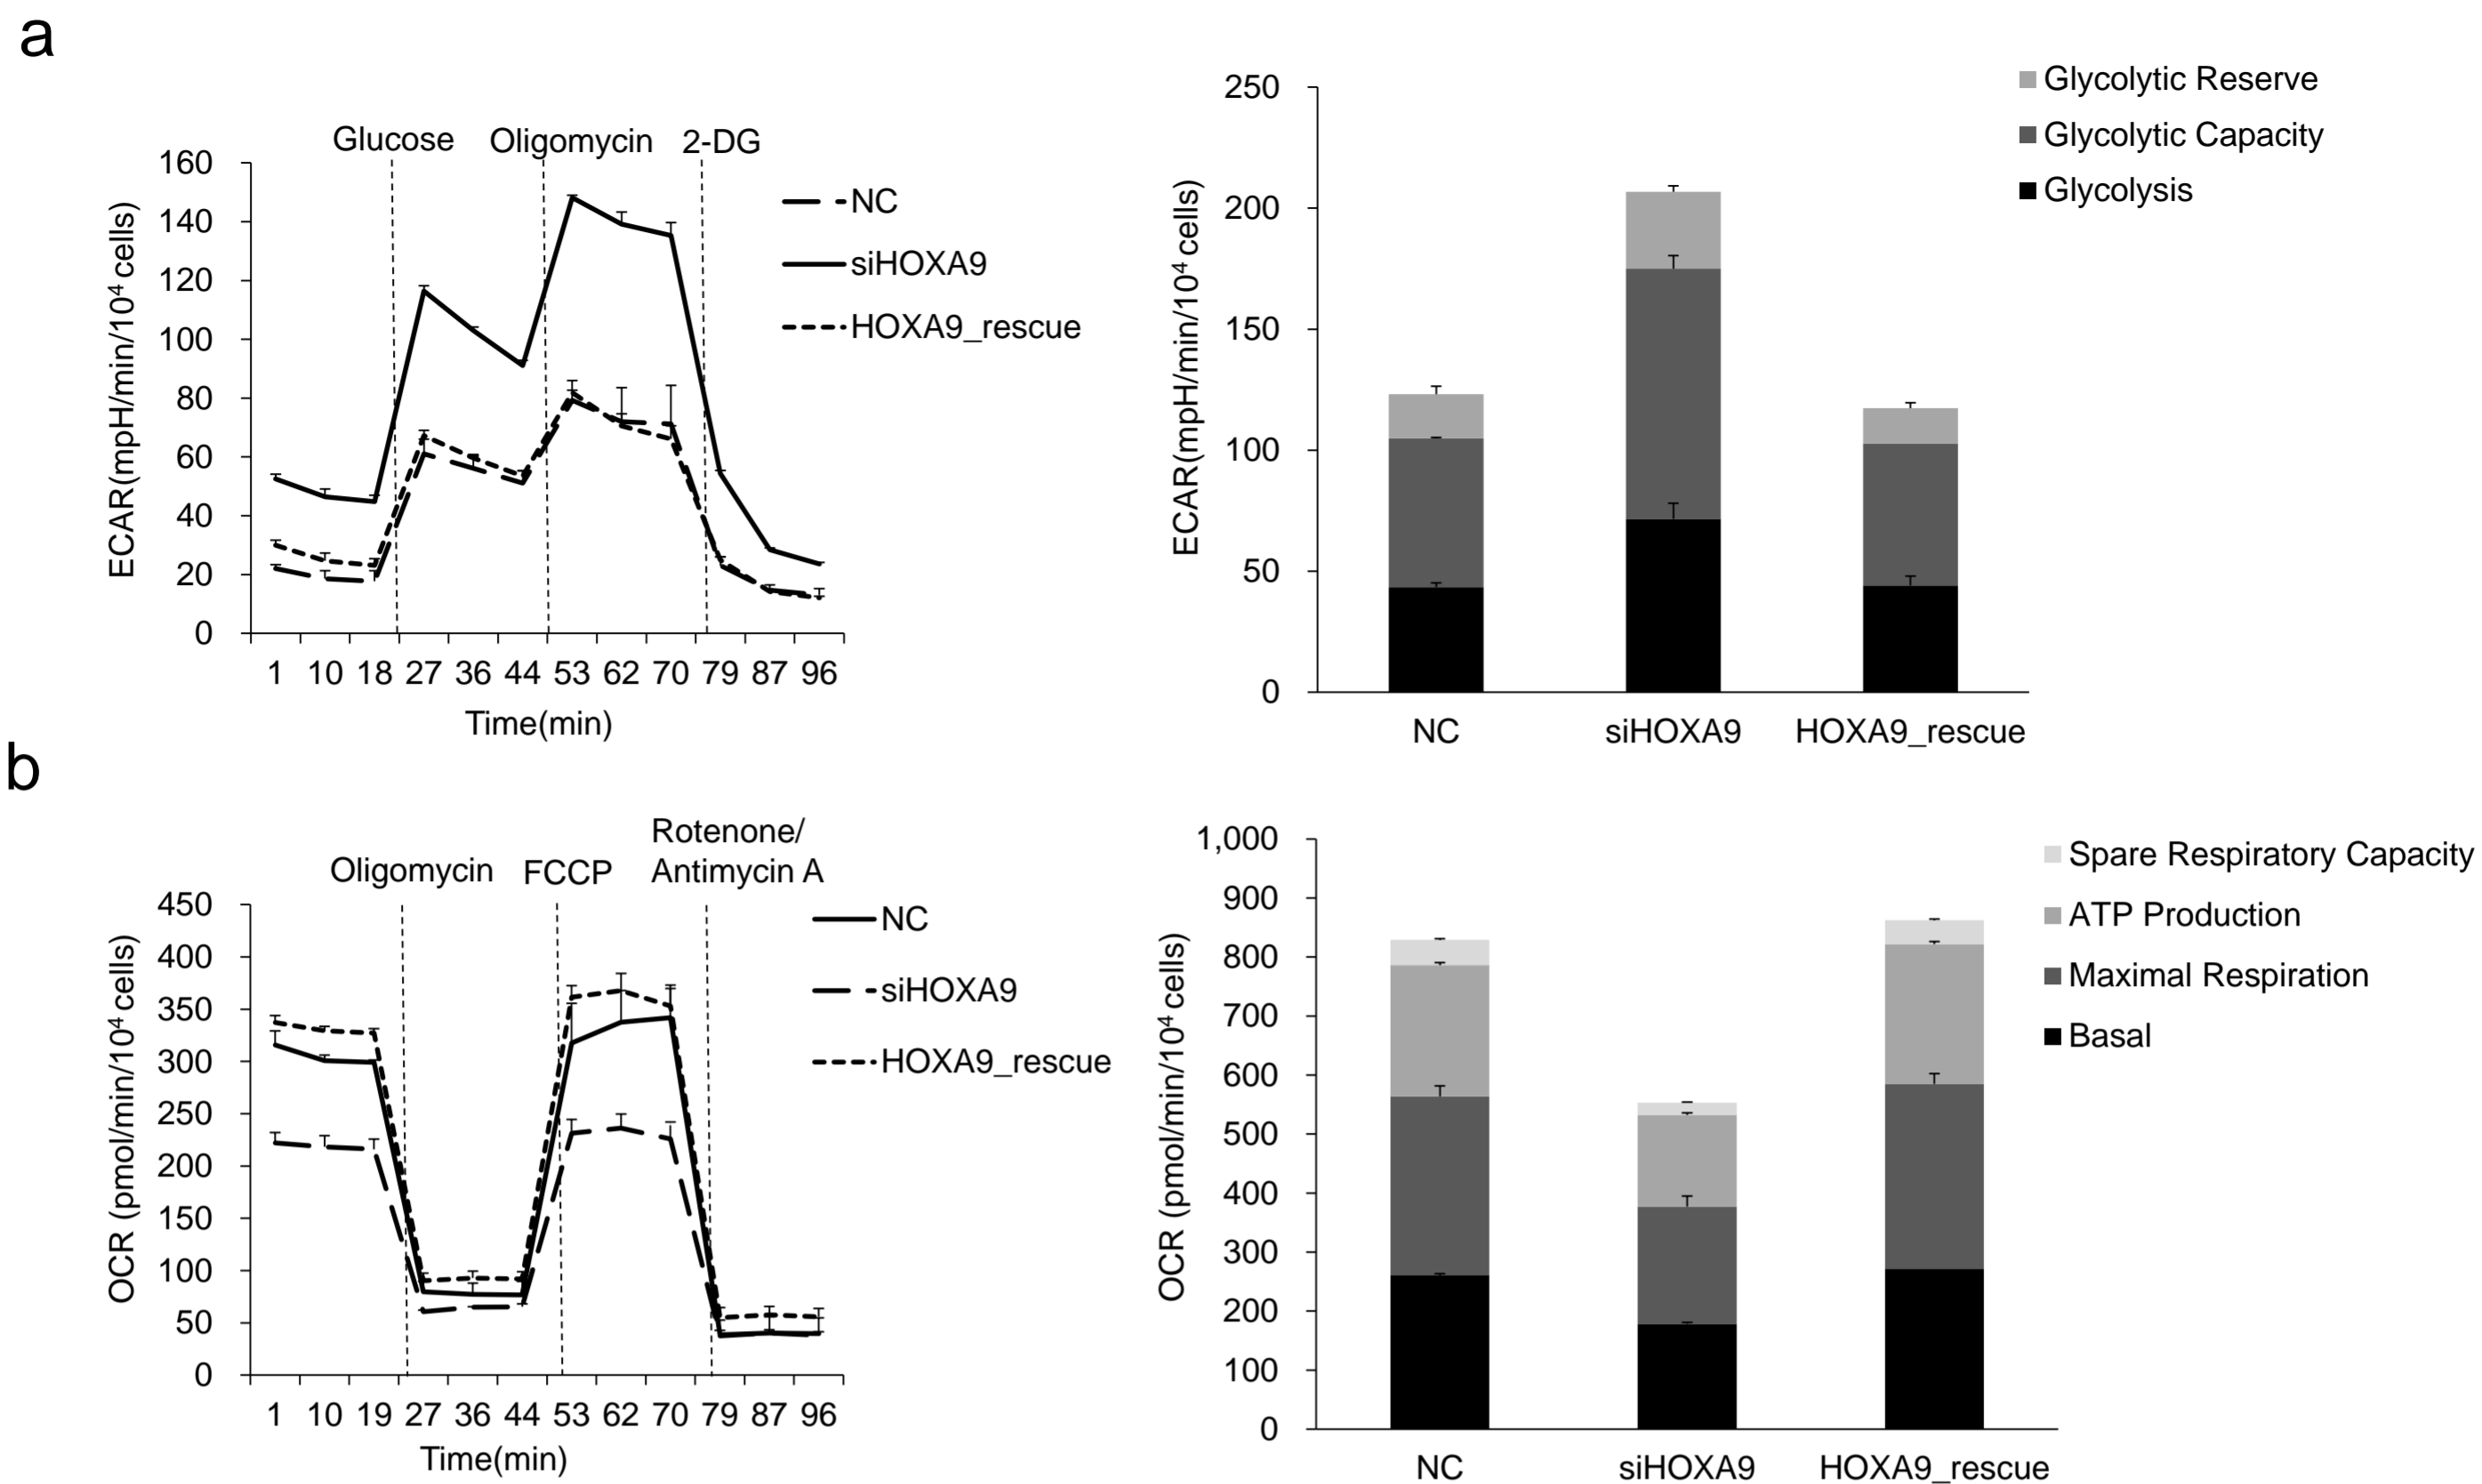

**Supplementary Figure 10. Rescue experiments by restoring HOXA9 expression after HOXA9 depletion to verify the glycolysis-inhibitive role of HOXA9.** (a,b) Left panels: ECAR and OCR analysis of A431 cells, in which HOXA9 was first depleted by siRNA treatment and then restored by HOXA9-expressing plasmid, followed by treatment with the indicated compounds; right panels: glycolytic variations (glycolysis, glycolytic capacity, and glycolytic reserve) or OXPHOS variations (basal, maximal respiration, ATP production, and spare respiratory capacity) were summarized from raw data. Each experiment was performed at least in triplicate and data are presented as mean  $\pm$  s.d. One-Way ANOVA and Dunnett's multiple comparison test were used to analyze the data (\* $P < 0.05$ , \*\* $P < 0.01$ , \*\*\* $P < 0.001$ ).

CRIP2 peptide A: ASSVTTFTGEPNTCPR. t = 30.46min

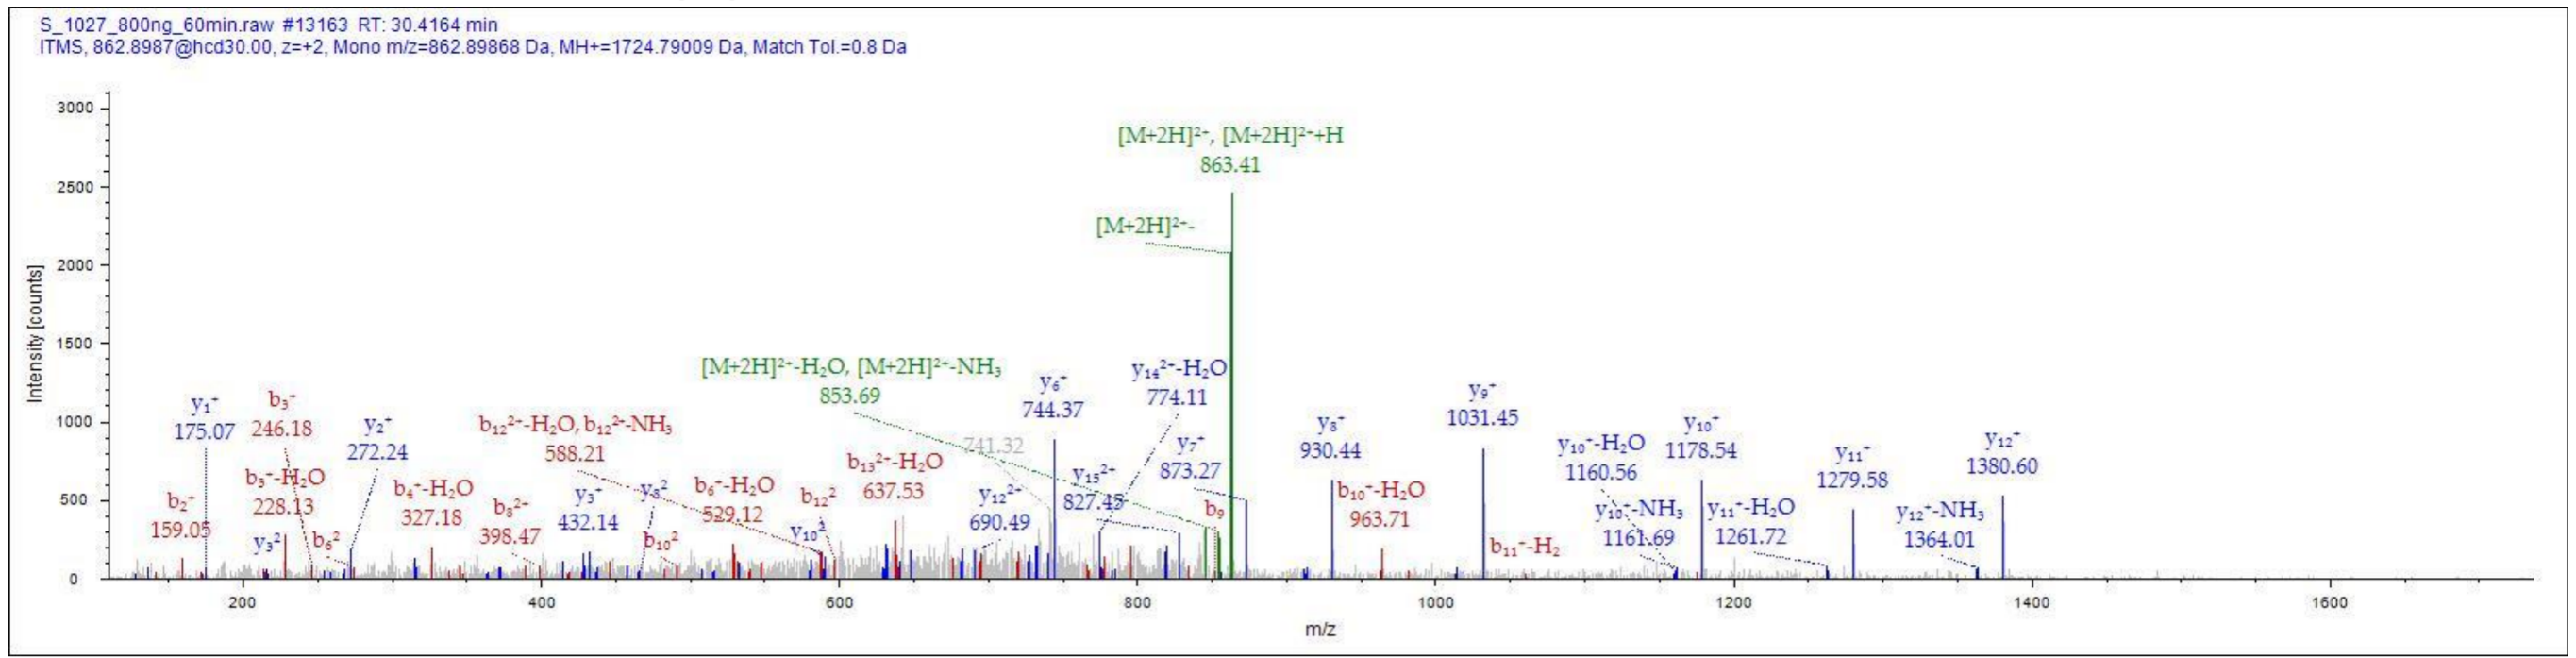

CRIP2 peptide B: GVNIGGAGSYIYEKPLAEGPQVTGPIEVPAAR. t = 51.21min

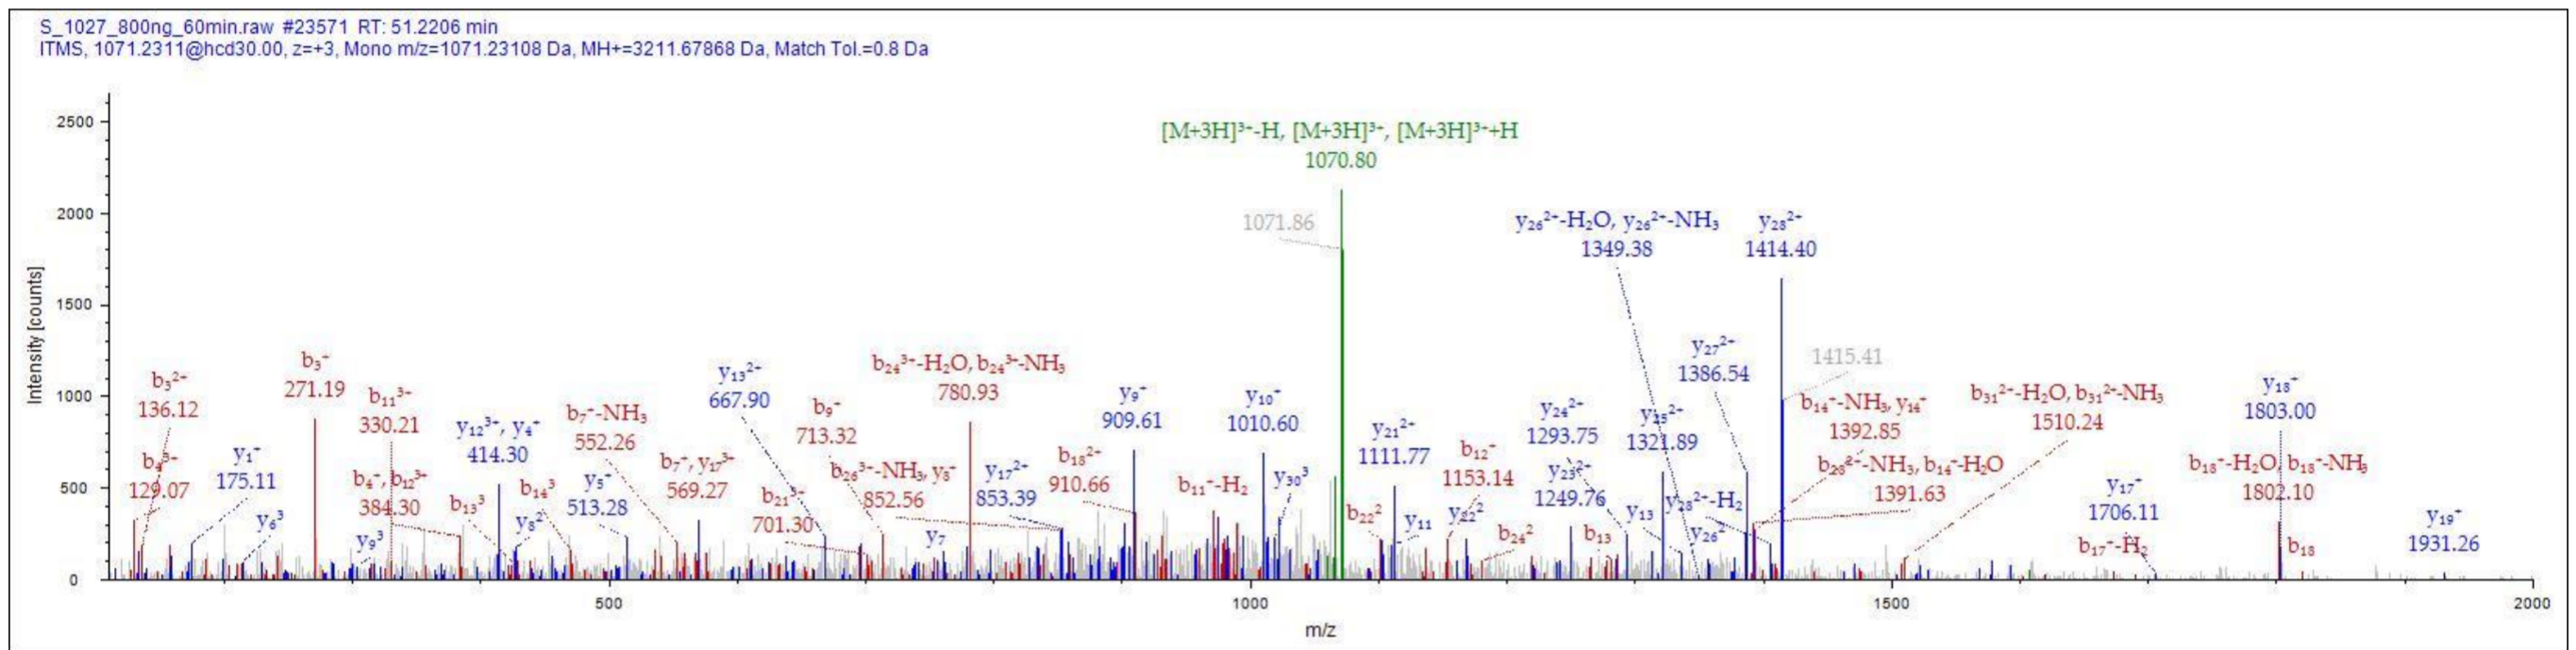

**Supplementary Figure 11. The amino acid sequences of two CRIP2 peptides were identified by high performance liquid chromatography-mass spectrometry (HPLC-MS) analysis of the protein mix immunoprecipitated by HOXA9 antibody.**

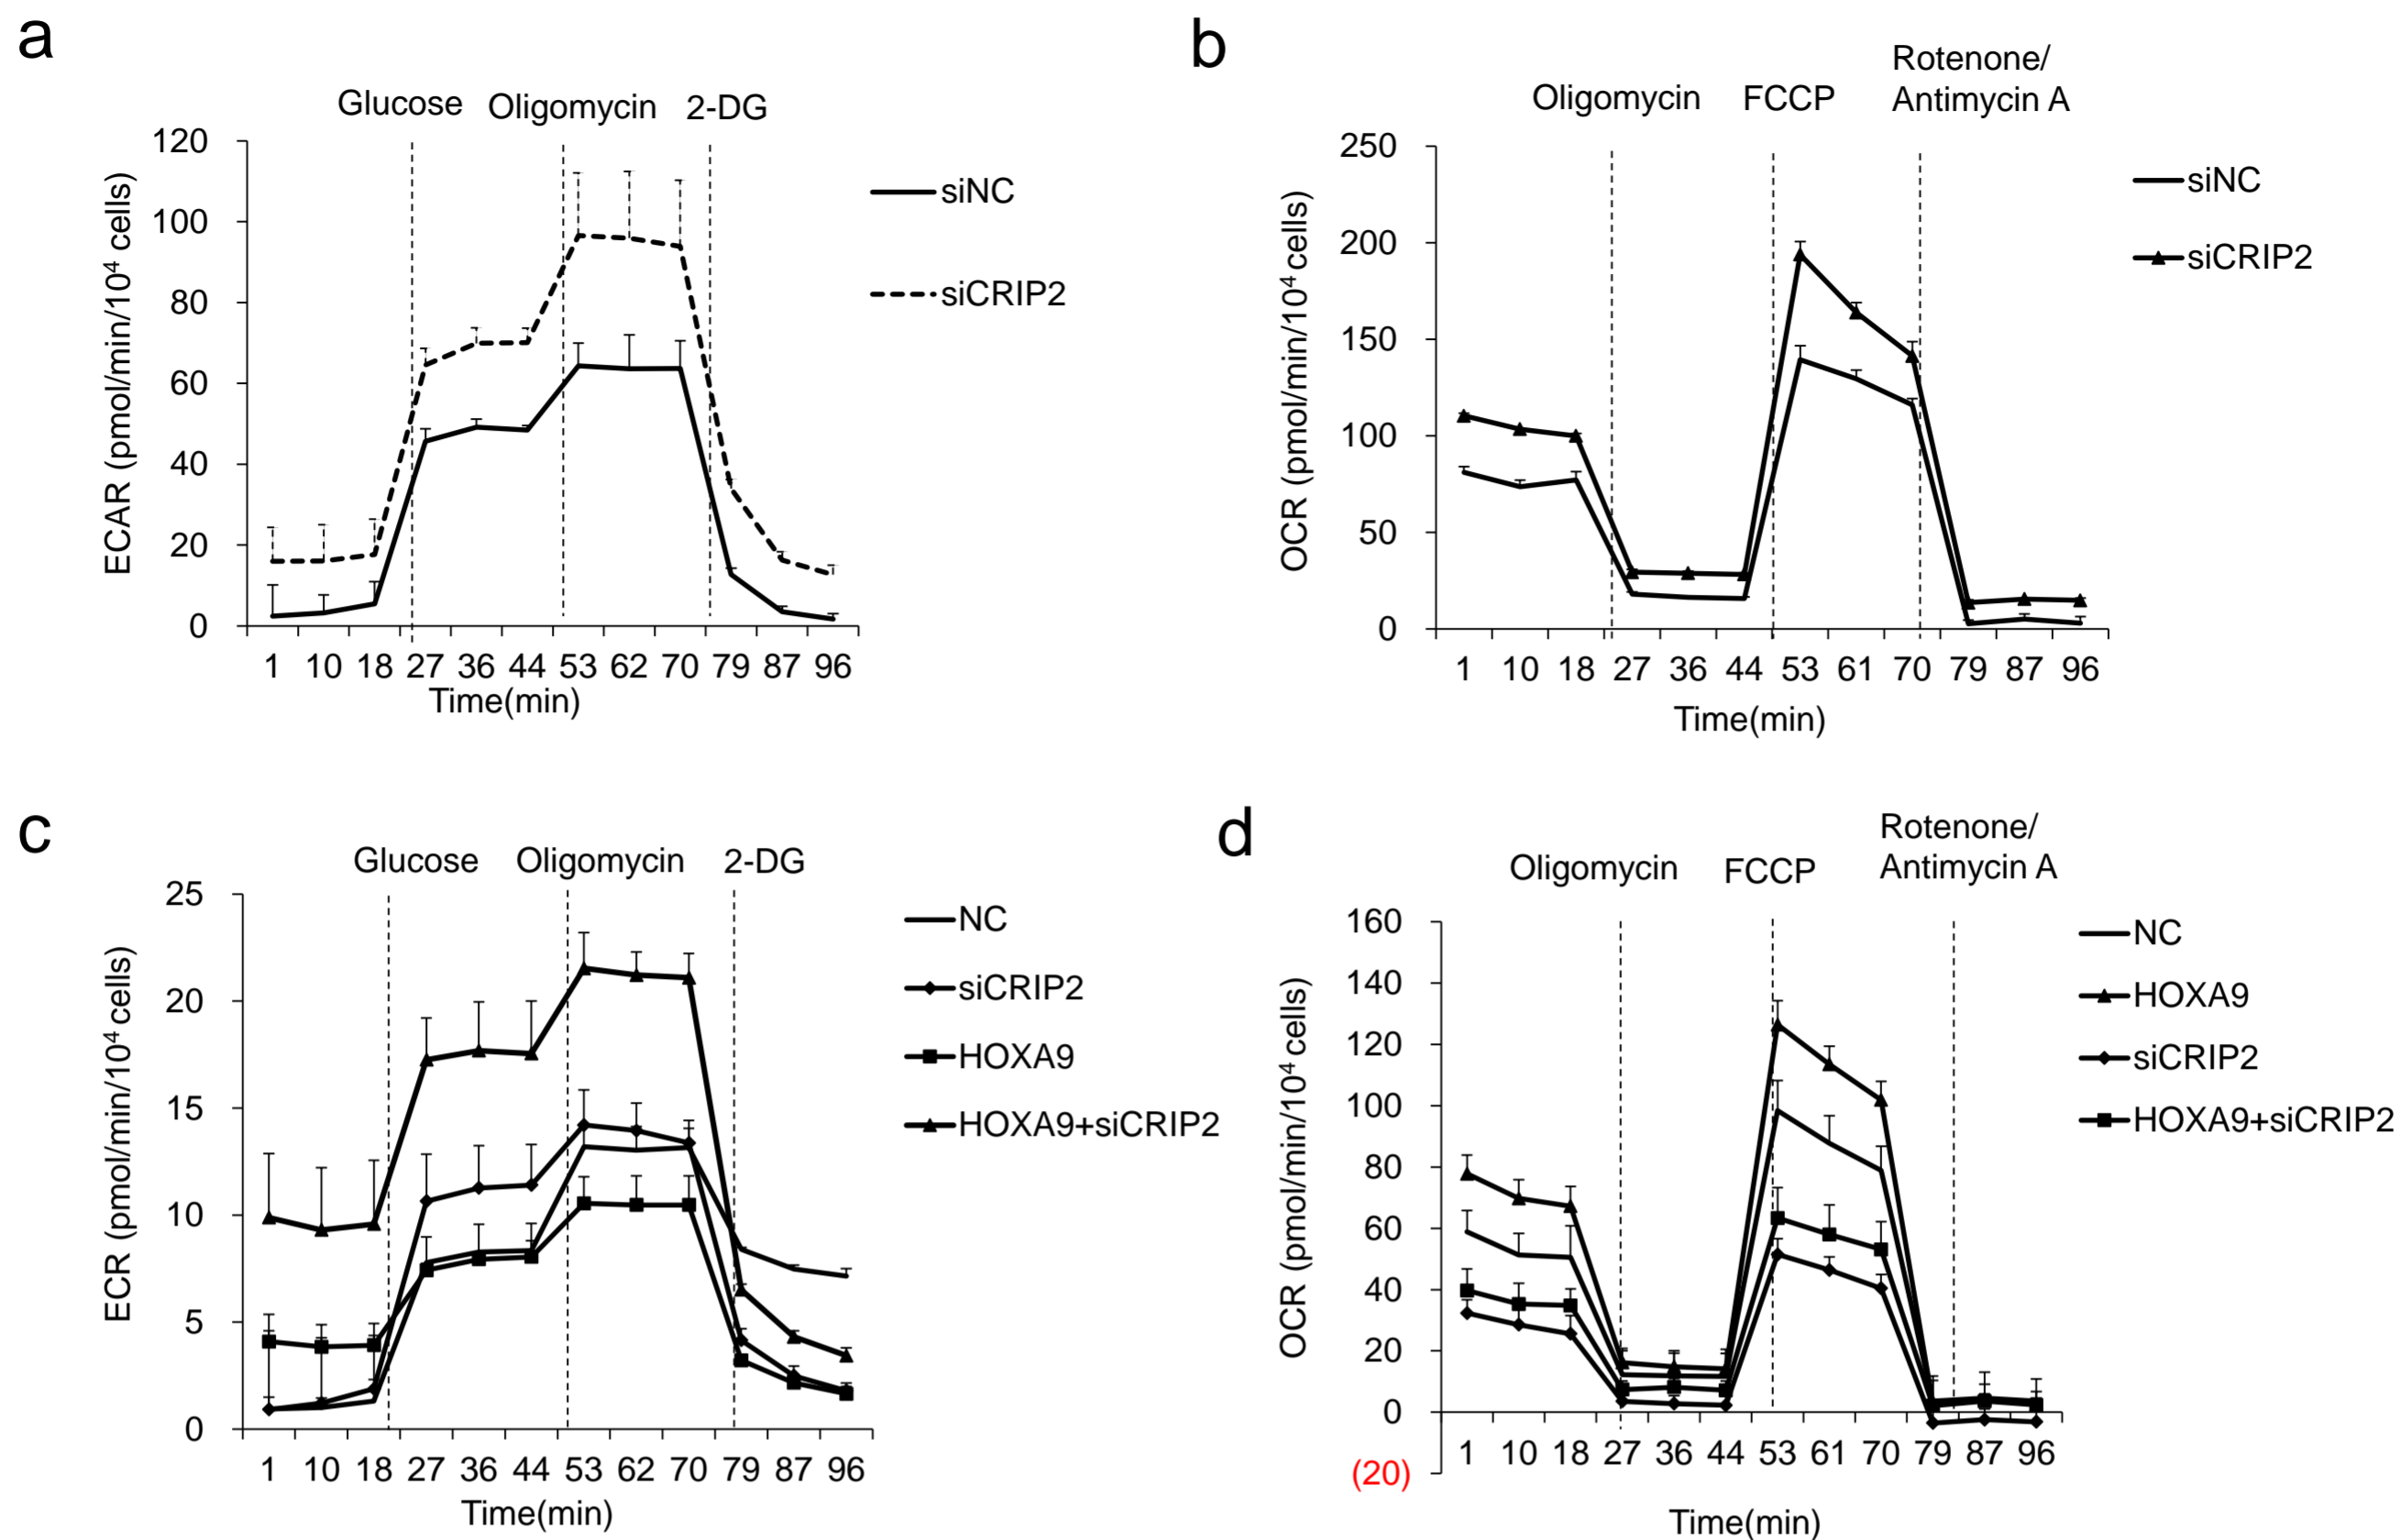

**Supplementary Figure 12. The role of CRIP2 in glucose metabolism of CSCC was evaluated by OCR and ECAR assay. (a,b) Left panels: ECAR and OCR analysis of A431 cells, in which CRIP2 was depleted using siRNA or HOXA9 was overexpressed by HOXA9-expressing plasmid as indicated, followed by treatment with the indicated compounds; right panels: glycolytic variations (glycolysis, glycolytic capacity, and glycolytic reserve) or OXPHOS variations (basal, maximal respiration, ATP production, and spare respiratory capacity) were summarized from raw data. Each experiment was performed at least in triplicate and data are presented as mean  $\pm$  s.d. One-Way ANOVA and Dunnett's multiple comparison test were used to analyze the data (\* $P < 0.05$ , \*\* $P < 0.01$ , \*\*\* $P < 0.001$ ).**

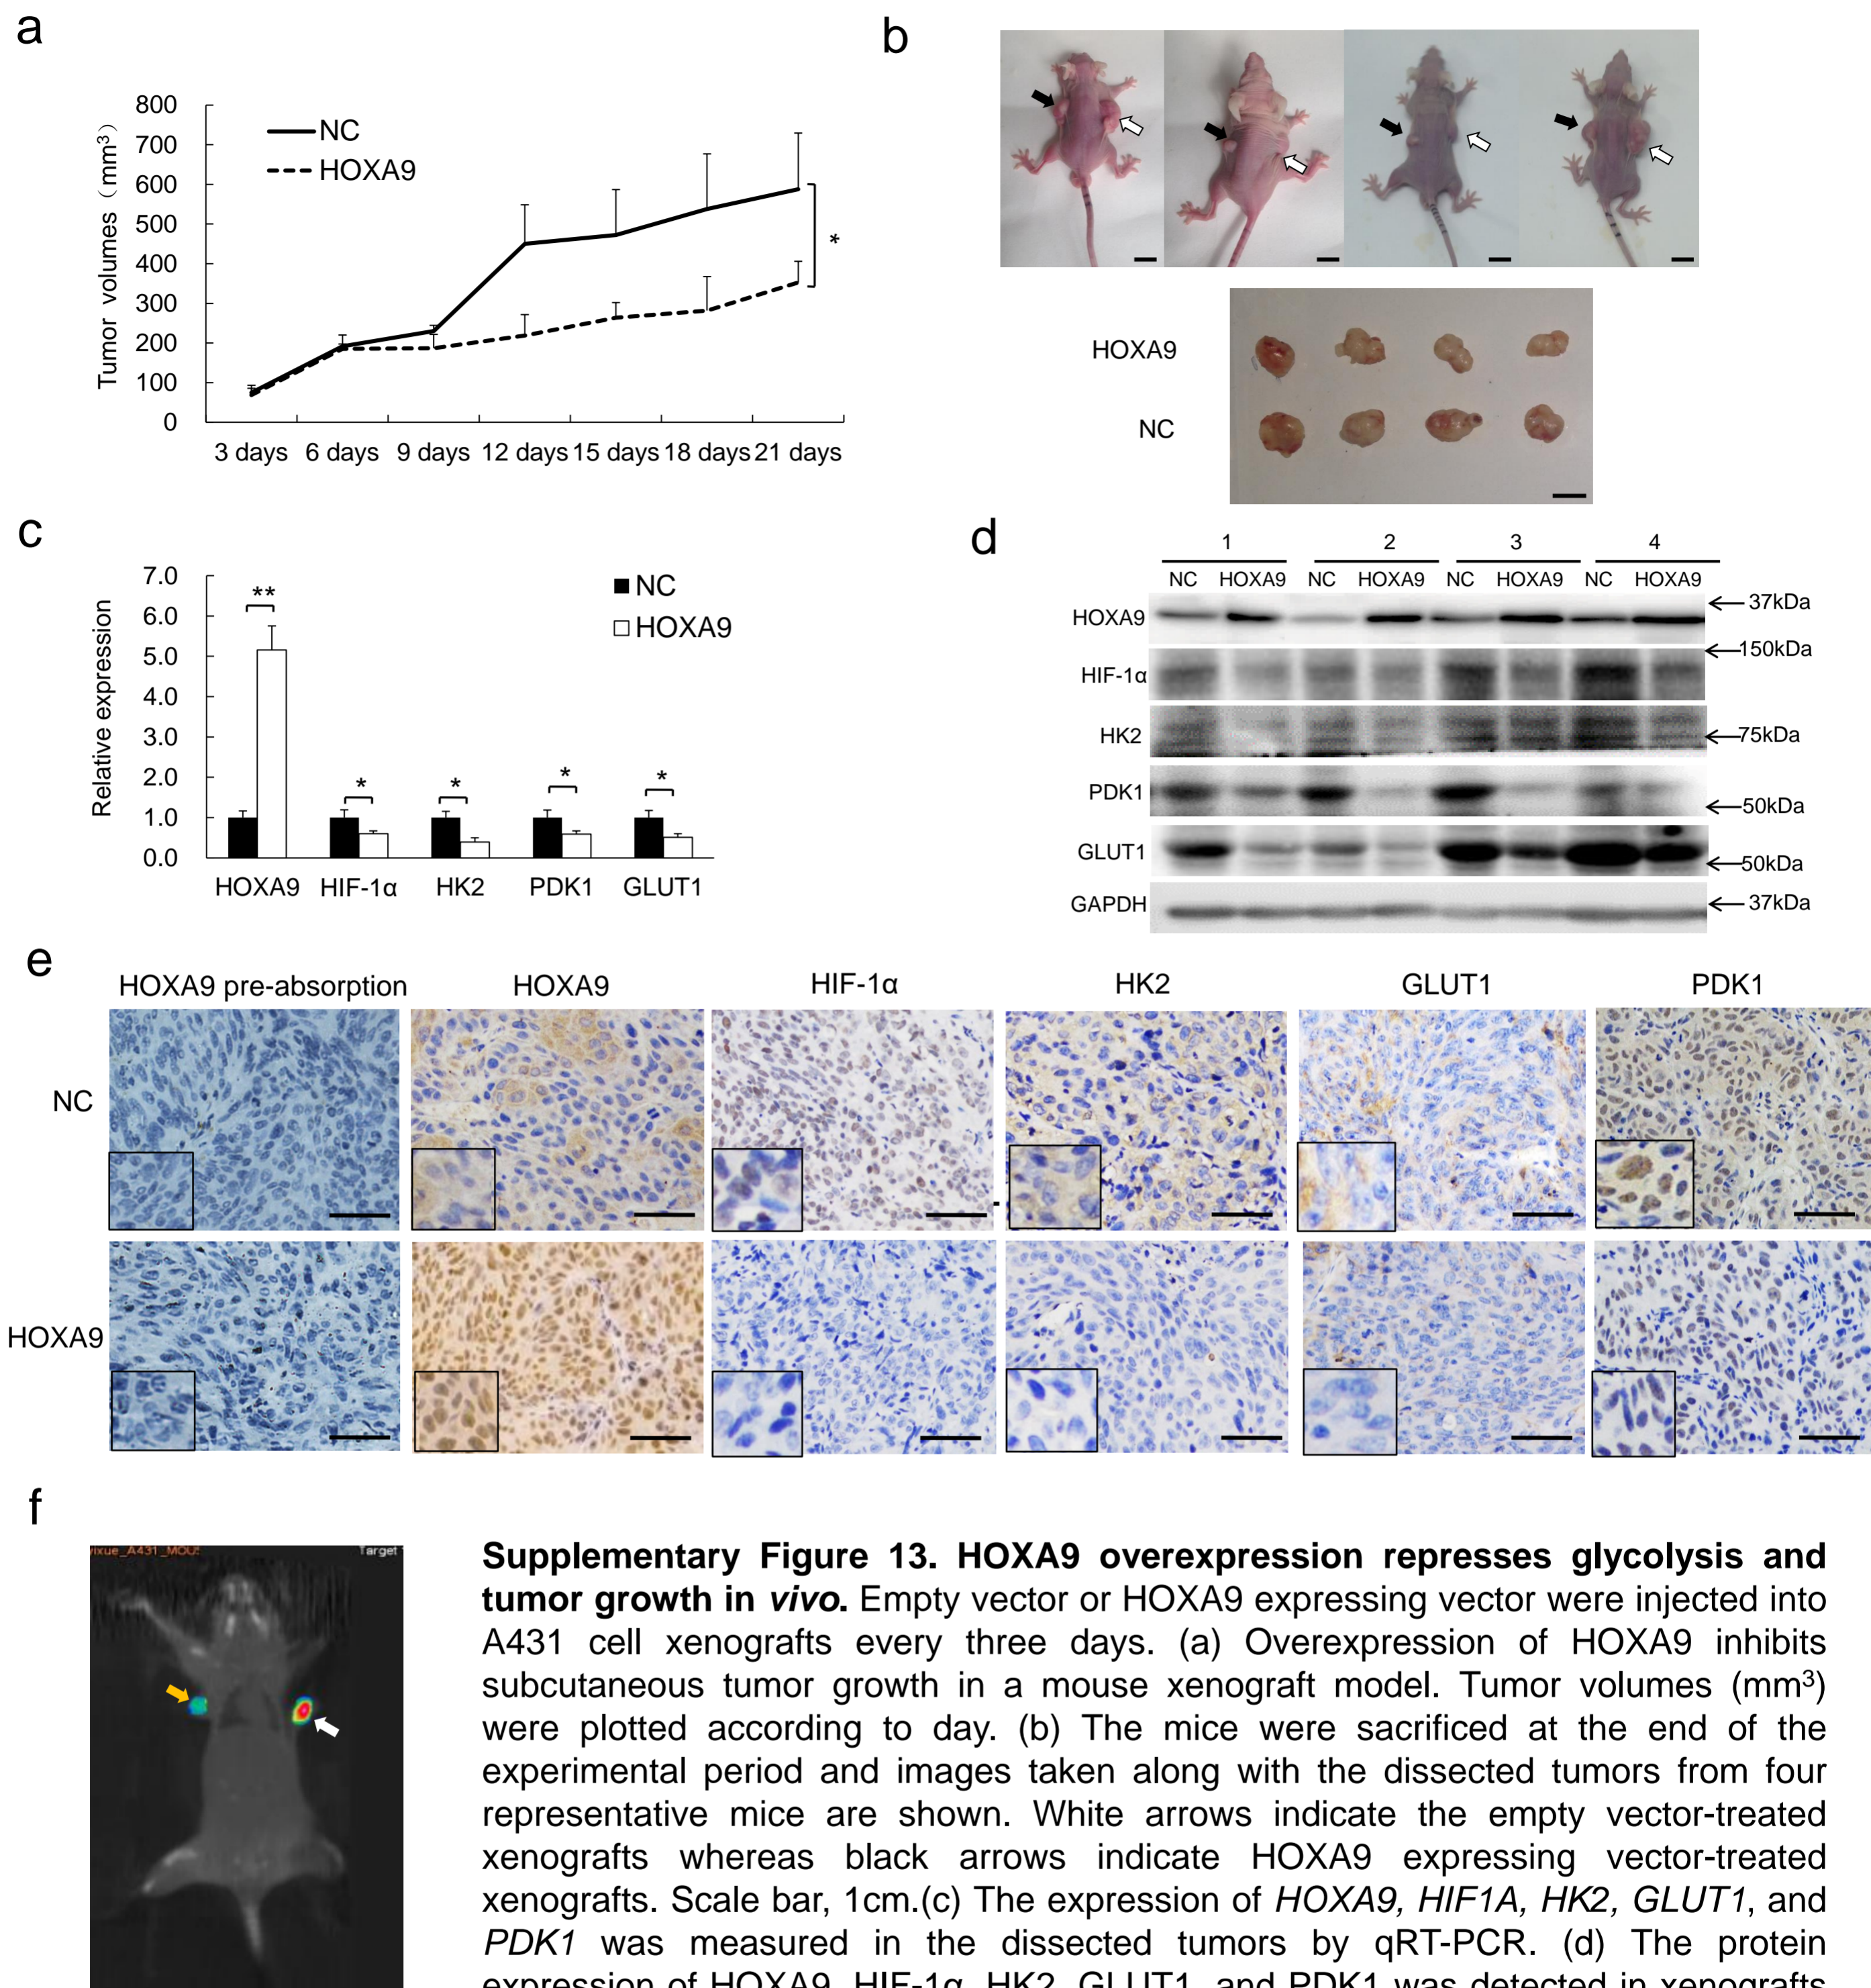

**Supplementary Figure 13. HOXA9 overexpression represses glycolysis and tumor growth in vivo.** Empty vector or HOXA9 expressing vector were injected into A431 cell xenografts every three days. (a) Overexpression of HOXA9 inhibits subcutaneous tumor growth in a mouse xenograft model. Tumor volumes ( $\text{mm}^3$ ) were plotted according to day. (b) The mice were sacrificed at the end of the experimental period and images taken along with the dissected tumors from four representative mice are shown. White arrows indicate the empty vector-treated xenografts whereas black arrows indicate HOXA9 expressing vector-treated xenografts. Scale bar, 1cm. (c) The expression of *HOXA9*, *HIF1A*, *HK2*, *GLUT1*, and *PDK1* was measured in the dissected tumors by qRT-PCR. (d) The protein expression of HOXA9, HIF-1 $\alpha$ , HK2, GLUT1, and PDK1 was detected in xenografts after HOXA9 overexpression by using western blot. (e) Histopathology analysis (IHC staining) of HOXA9, HIF-1 $\alpha$ , HK2, GLUT1, and PDK1 on tumor sections. The quantification was performed by counting positively stained cells from 10 randomly chosen fields from a total of five sections per tumor. Scale bar, 100  $\mu\text{m}$ . (f) Comparison of glucose consumption between empty vector- and HOXA9 expressing vector-treated xenograft tumors by microPET/CT imaging of the uptake and retention of  $^{18}\text{F}$ -FDG administered by tail vein injection. Representative microPET/CT image is shown. Each experiment was performed at least in triplicate and data are presented as mean  $\pm$  s.d. One-Way ANOVA and Dunnett's multiple comparison test were used to analyze the data (\* $P < 0.05$ , \*\* $P < 0.01$ , \*\*\* $P < 0.001$ ).

# HaCaT cell line

## STR Profile:

| STR Profile | AMEL | CSF1PO | D13S317 | D16S539 | D5S818 | D7S820 | TH01 | TPOX  | vWA   |
|-------------|------|--------|---------|---------|--------|--------|------|-------|-------|
| HaCaT       | X    | 9 11   | 10 12   | 9 12    | 12     | 9 11   | 9.3  | 11 12 | 16 17 |

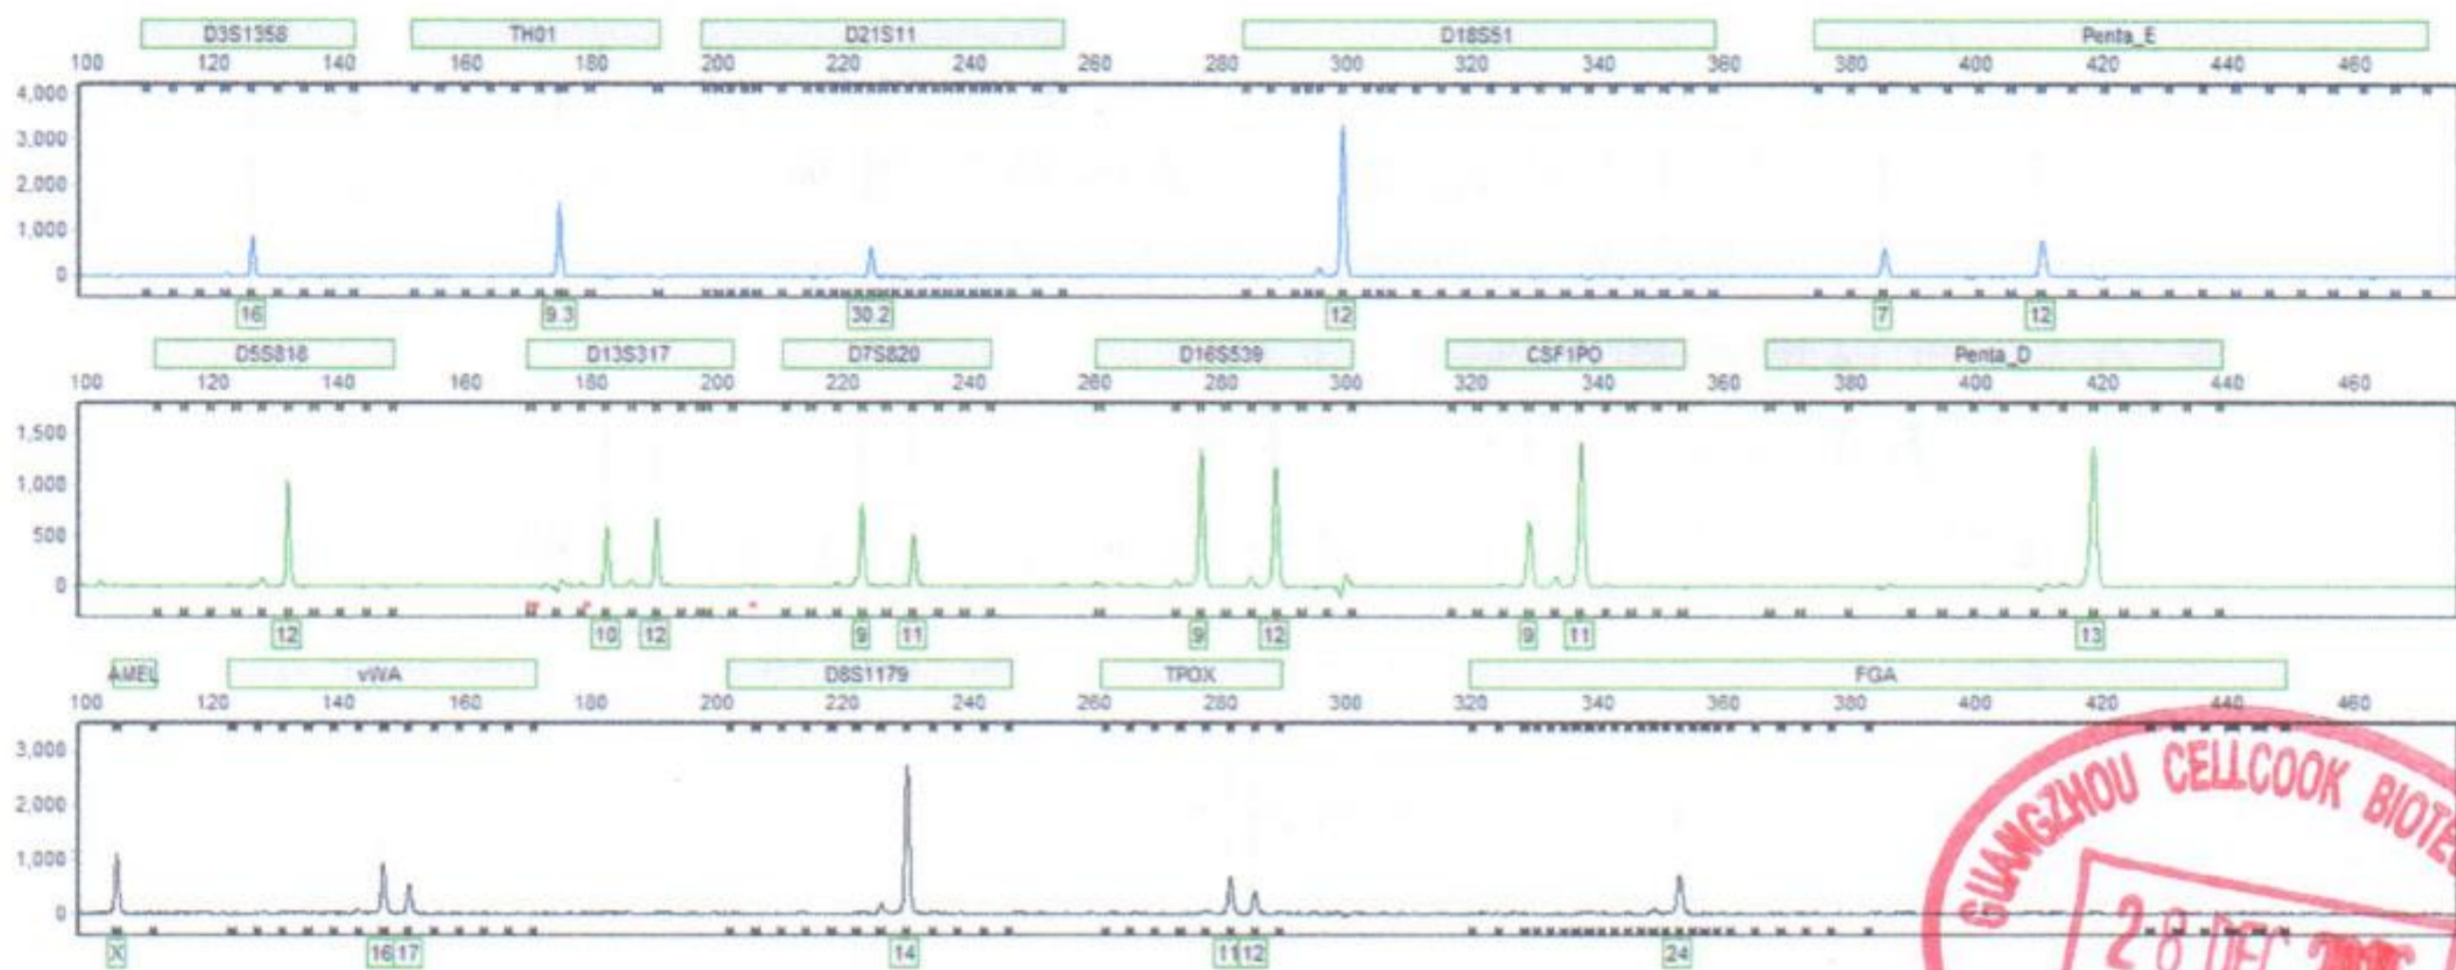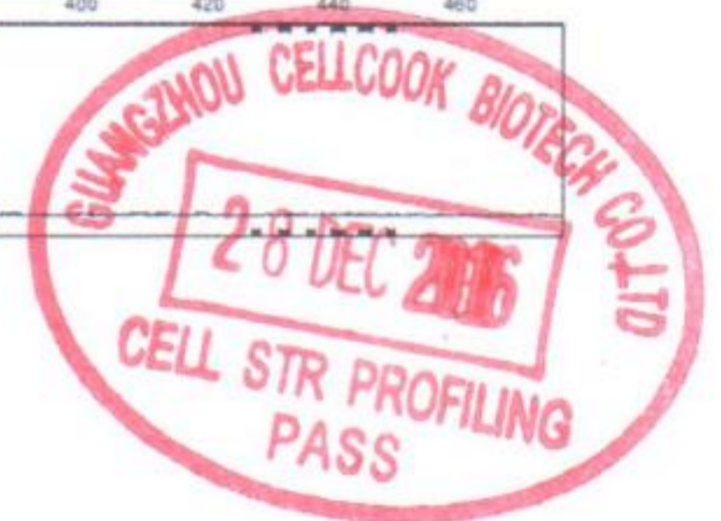

# A431 cell line

## STR 位点信息:

| STR Profile | AMEL | CSF1PO | D13S317 | D16S539 | D5S818 | D7S820 | TH01 | TPOX | vWA    |
|-------------|------|--------|---------|---------|--------|--------|------|------|--------|
| A431        | X    | 11, 12 | 9, 13   | 12, 14  | 12, 13 | 10     | 9    | 11   | 15, 17 |

## STR 鉴定图谱:

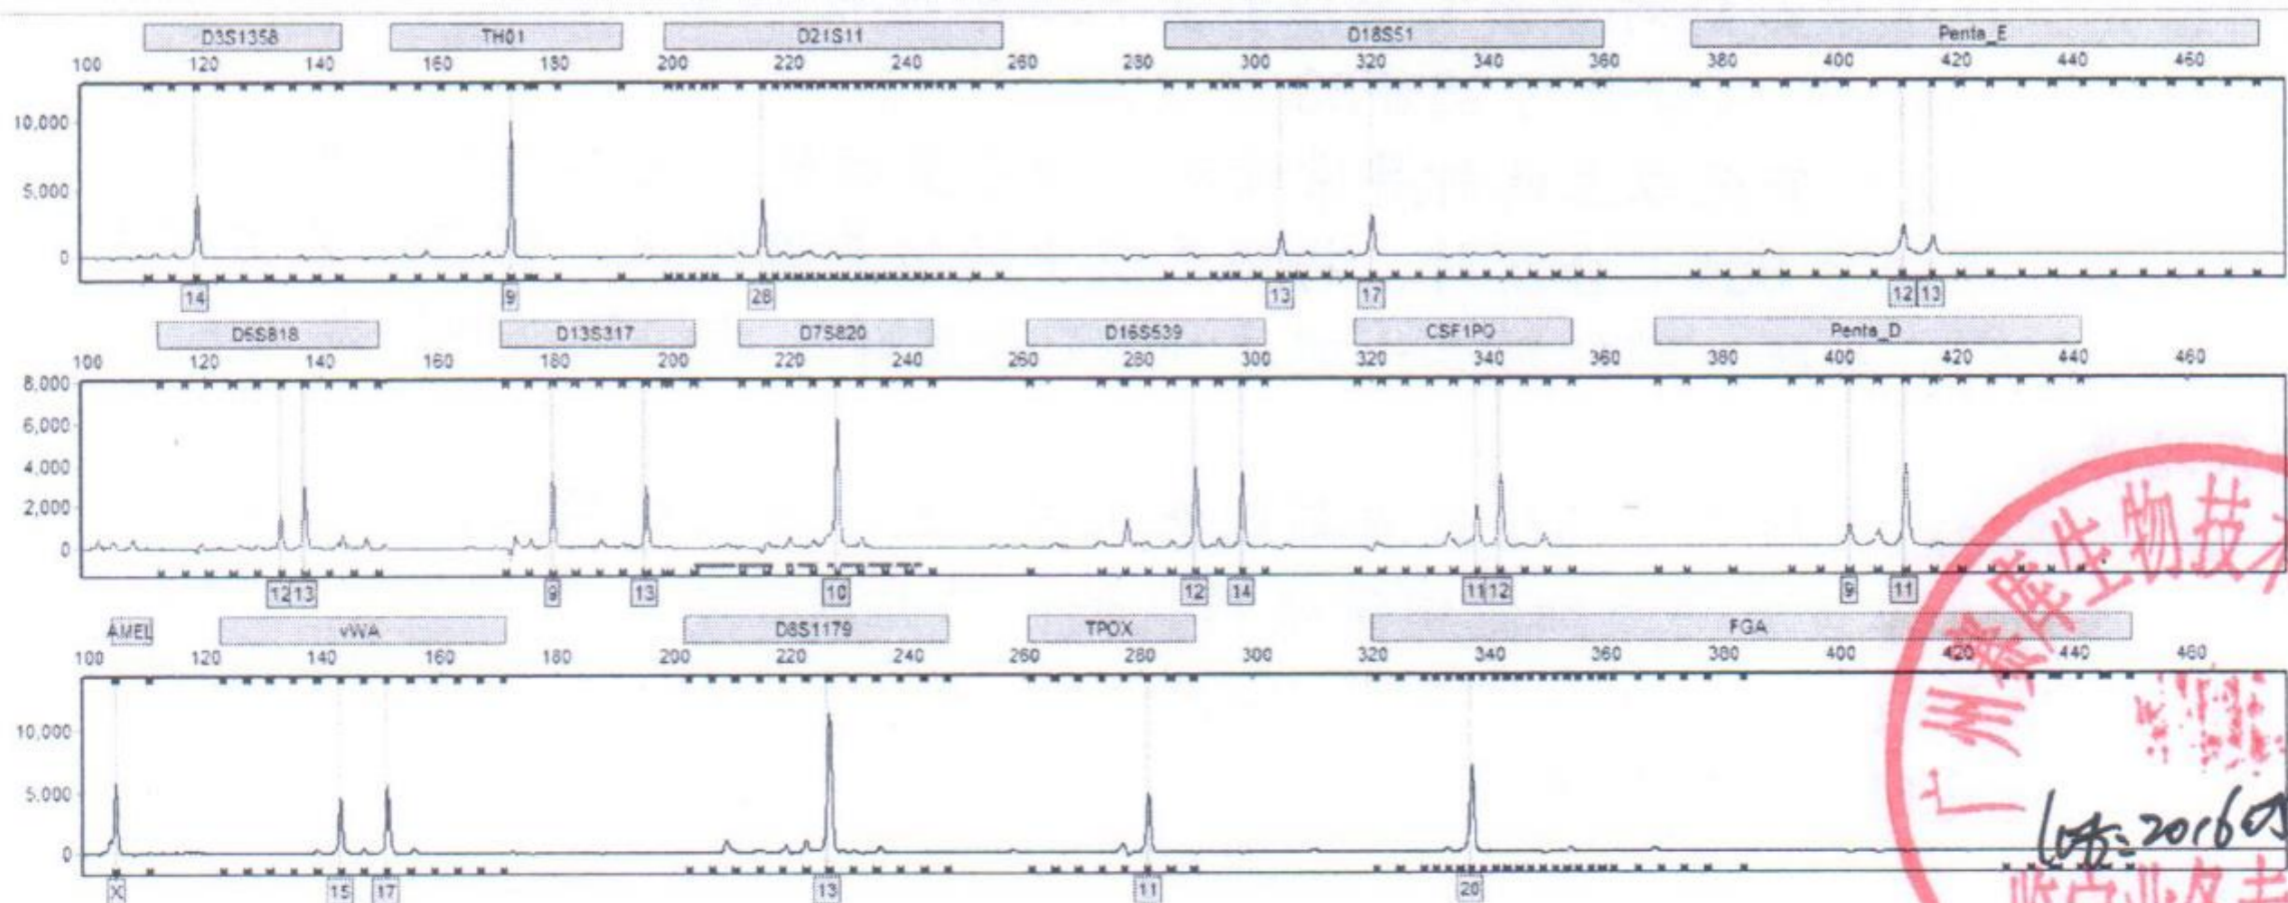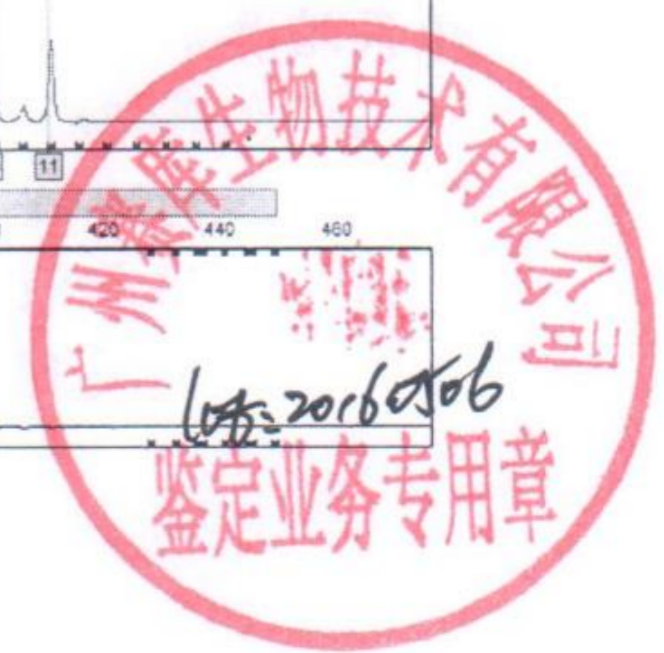

Supplementary Fig. 14. Authentication of cell lines by STR typing.

# HSC-1 cell line

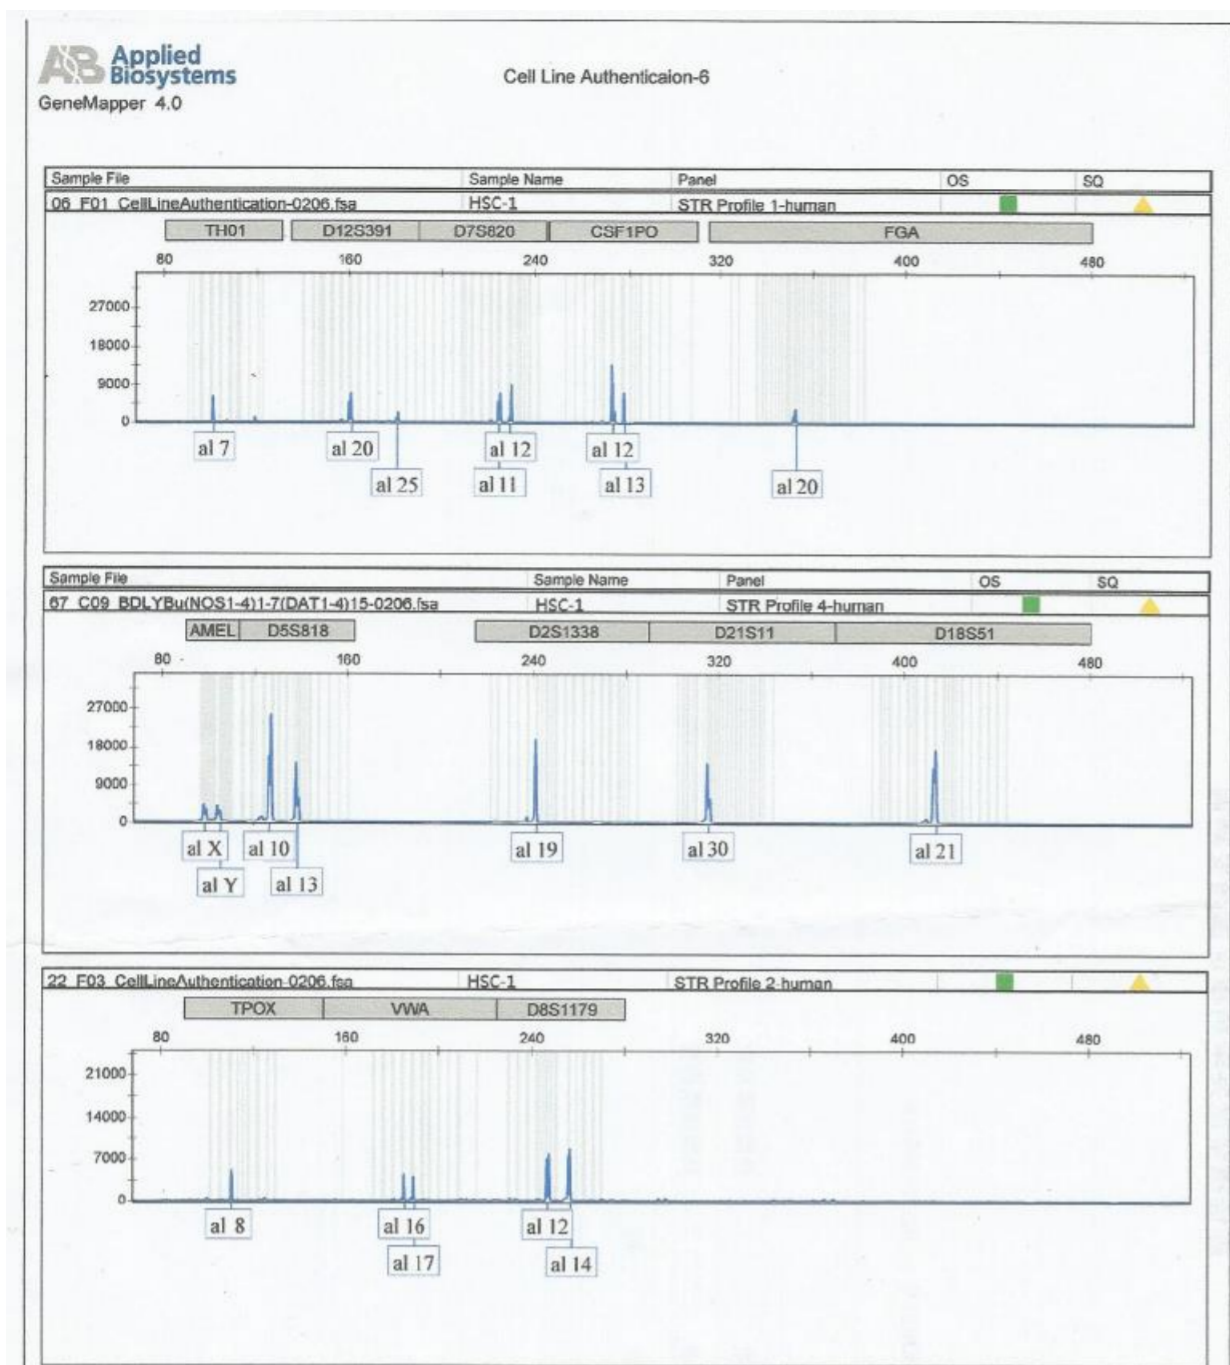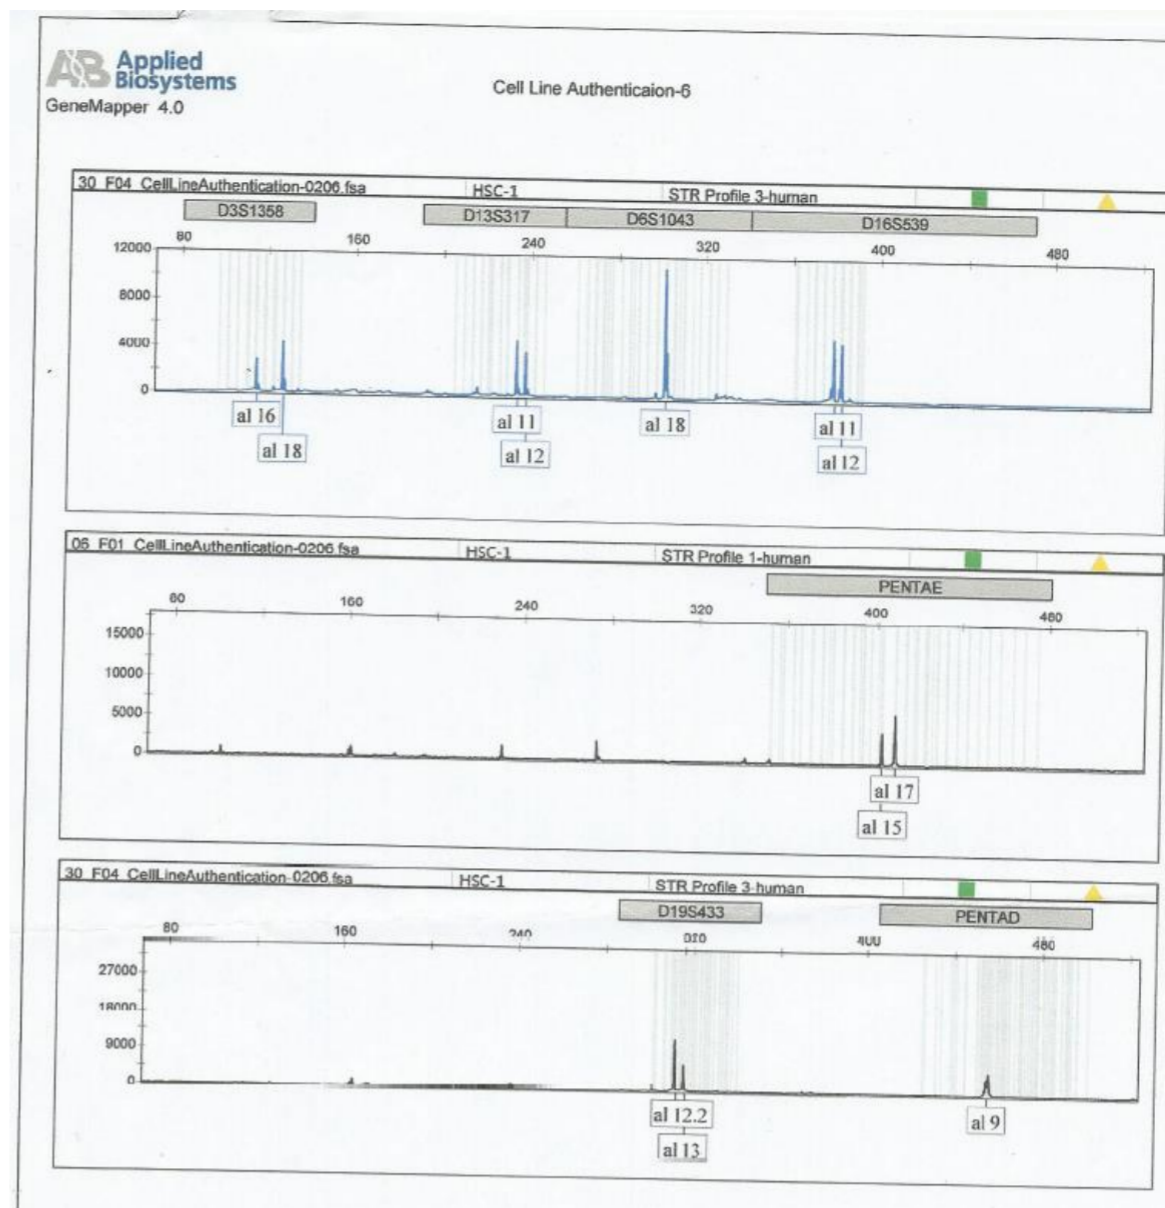

## 遗传质量鉴定检验报告

样品编号:

表1 样本编号

| 客户样本编号 | 公司编号        |
|--------|-------------|
| HSC-1  | 20170206-01 |

样品数量: 1

样品性状: 细胞系

检测项目: STR

送检单位: 弘顺生物

检测方法: 用 Axygen 的基因组抽提试剂盒提取 DNA, 采用 20- STR 扩增方案扩增, 在 ABI 3730XL 型遗传分析仪上对 STR 位点和性别基因 Amclogenin 进行检测。

检验结果:

(一) 检验基本情况

表2: 样本基因型检验结果

| 样本编号        | 多等位基因 | 匹配细胞系 | 细胞库  | EV 值 | 匹配说明 |
|-------------|-------|-------|------|------|------|
| 20170206-01 | 无     | HSC-1 | JCRB | 1    | 完全匹配 |

- 多等位基因指三等位及以上基因现象。
- 本次检测各细胞分型结果良好。

(二) 各样本描述

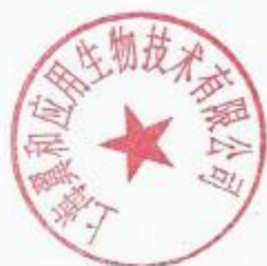

- 20170206-01: 该株细胞 DNA 分型在细胞系检索中找到**完全匹配**的细胞系, JCRB 数据库显示细胞名为 **HSC-1**, 细胞号对应 **JCRB1015**。本次检测在该细胞系中**没有发现多等位基因**。
- 备注: 待测细胞系与收录于 ATCC, DSMZ, JCRB 和 RIKEN 数据库的细胞系 STR 数据进行比对, 未收录于以上细胞库的细胞系将无法匹配。

(三) 样本分型结果

表3: 细胞 20170206-01 的 STR 位点和 Amclogenin 位点的基因分型结果

| Marker  | 样本      |         |         |         | 细胞库信息   |         |         |
|---------|---------|---------|---------|---------|---------|---------|---------|
|         | Allele1 | Allele2 | Allele3 | Allele4 | Allele1 | Allele2 | Allele3 |
| D5S818  | 10      | 13      |         |         | 10      | 13      |         |
| D13S317 | 11      | 12      |         |         | 11      | 12      |         |
| D7S820  | 11      | 12      |         |         | 11      | 12      |         |
| D16S539 | 11      | 12      |         |         | 11      | 12      |         |
| VWA     | 16      | 17      |         |         | 16      | 17      |         |
| TH01    | 7       | 7       |         |         | 7       | 7       |         |
| AMEL    | X       | Y       |         |         | X       | Y       |         |
| TPOX    | 8       | 8       |         |         | 8       | 8       |         |
| CSF1PO  | 12      | 13      |         |         | 12      | 13      |         |
| D12S391 | 20      | 25      |         |         |         |         |         |
| FGA     | 20      | 20      |         |         |         |         |         |
| D2S1338 | 19      | 19      |         |         |         |         |         |
| D21S11  | 30      | 30      |         |         |         |         |         |
| D18S51  | 21      | 21      |         |         |         |         |         |
| D8S1179 | 12      | 14      |         |         |         |         |         |
| D3S1358 | 16      | 18      |         |         |         |         |         |
| D6S1043 | 18      | 18      |         |         |         |         |         |
| PENTAE  | 15      | 17      |         |         |         |         |         |
| D19S433 | 12.2    | 13      |         |         |         |         |         |
| PENTAD  | 9       | 9       |         |         |         |         |         |

其他说明:

(一) 分型方案及位点分布:

附表: 实验方案及位点

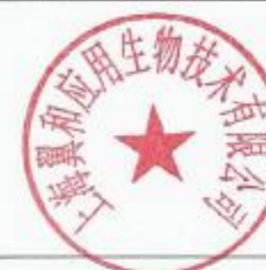

Supplementary Fig. 14 (continued). Authentication of cell lines by STR typing.



Related to Fig. 1a

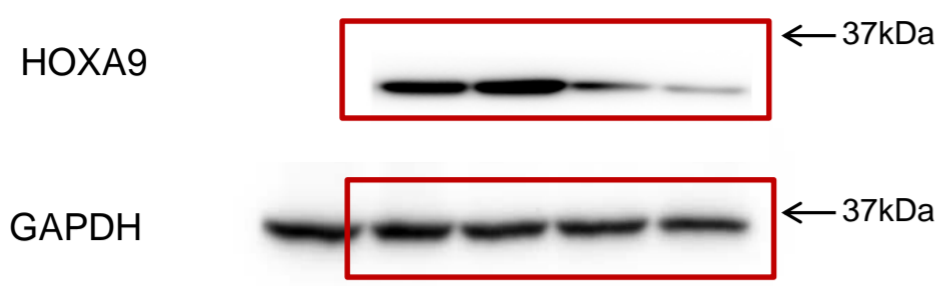

Related to Fig. 1b

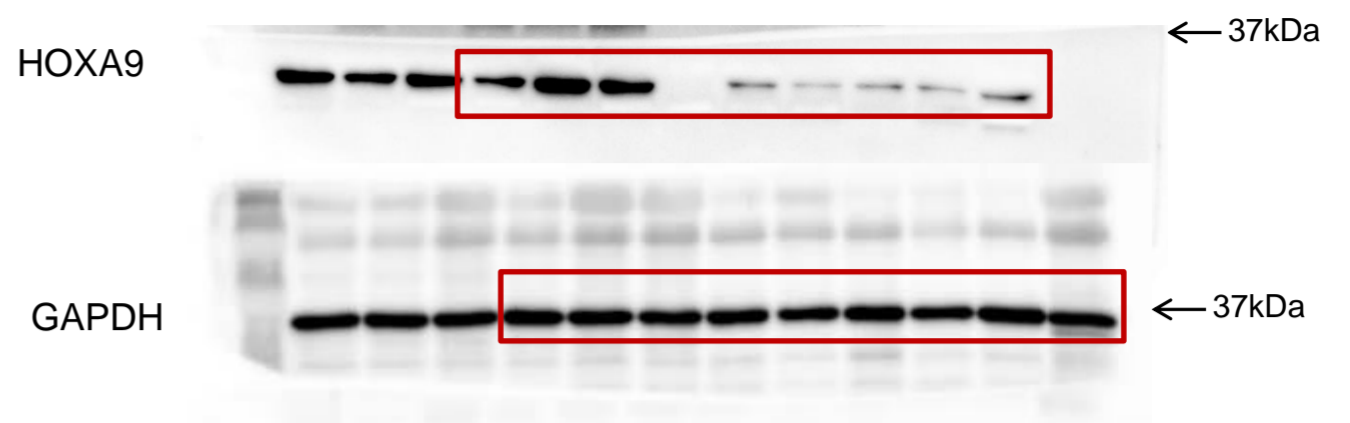

Related to Fig. 1h

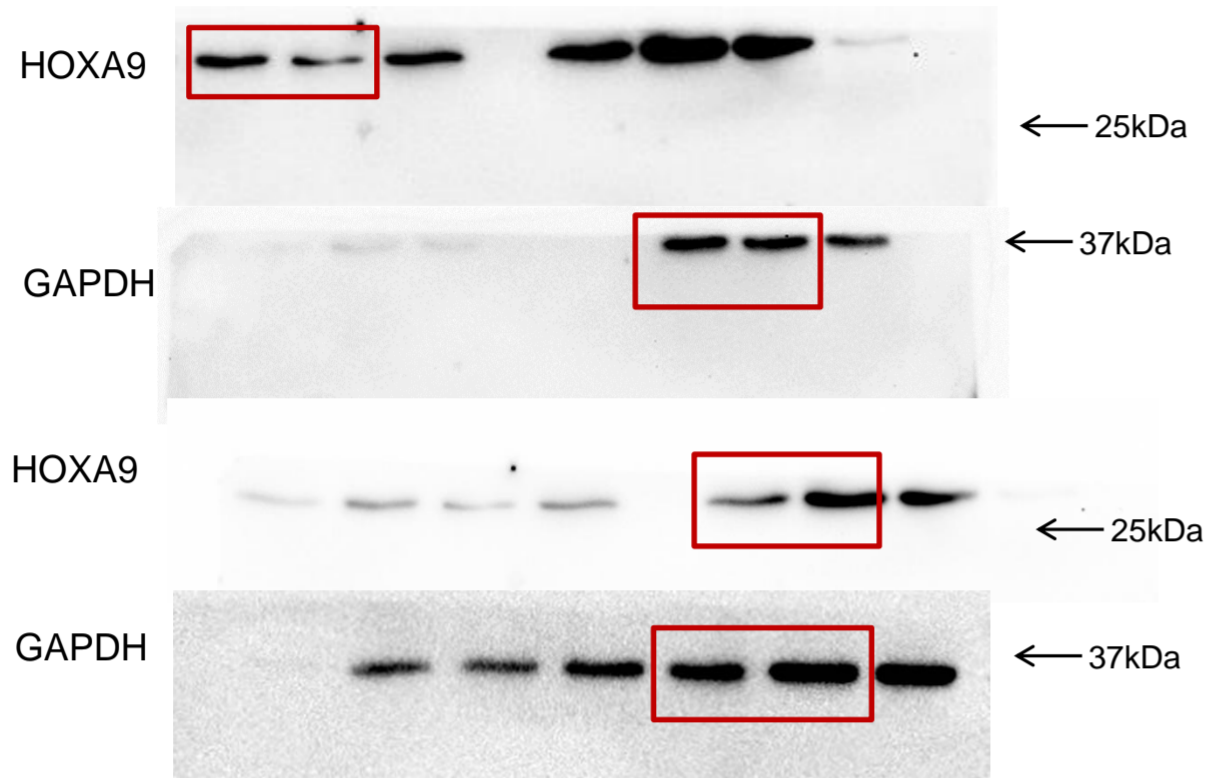

Related to Fig. 2a

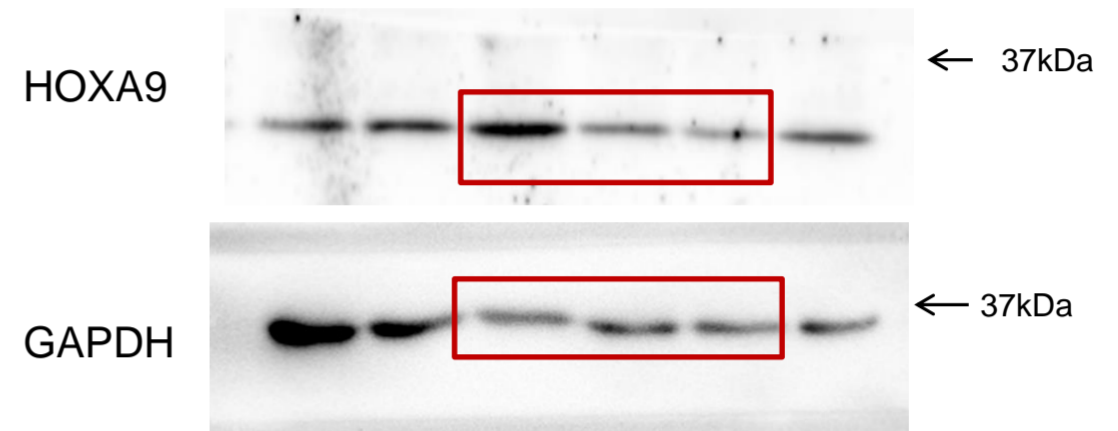

Related to Fig. 2g

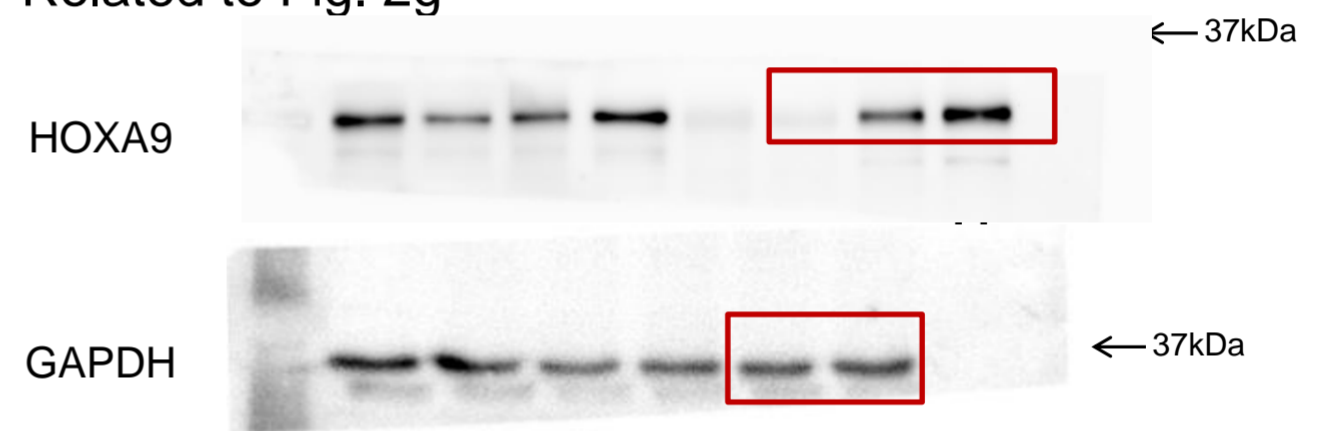

Related to Fig. 3a

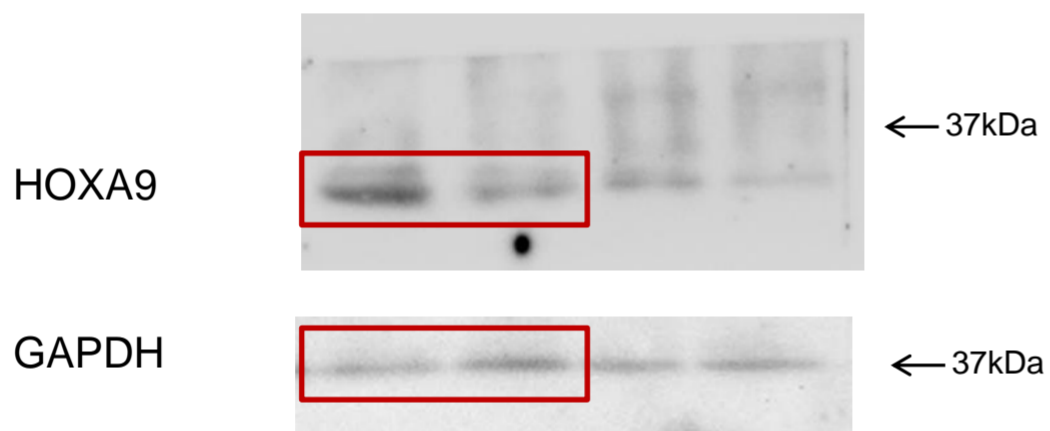

**Supplementary Figure 15. Uncropped images of blots and gels with size markers are presented.** Reference to the original figures is presented for each blot or gel.

Related to Fig. 5b

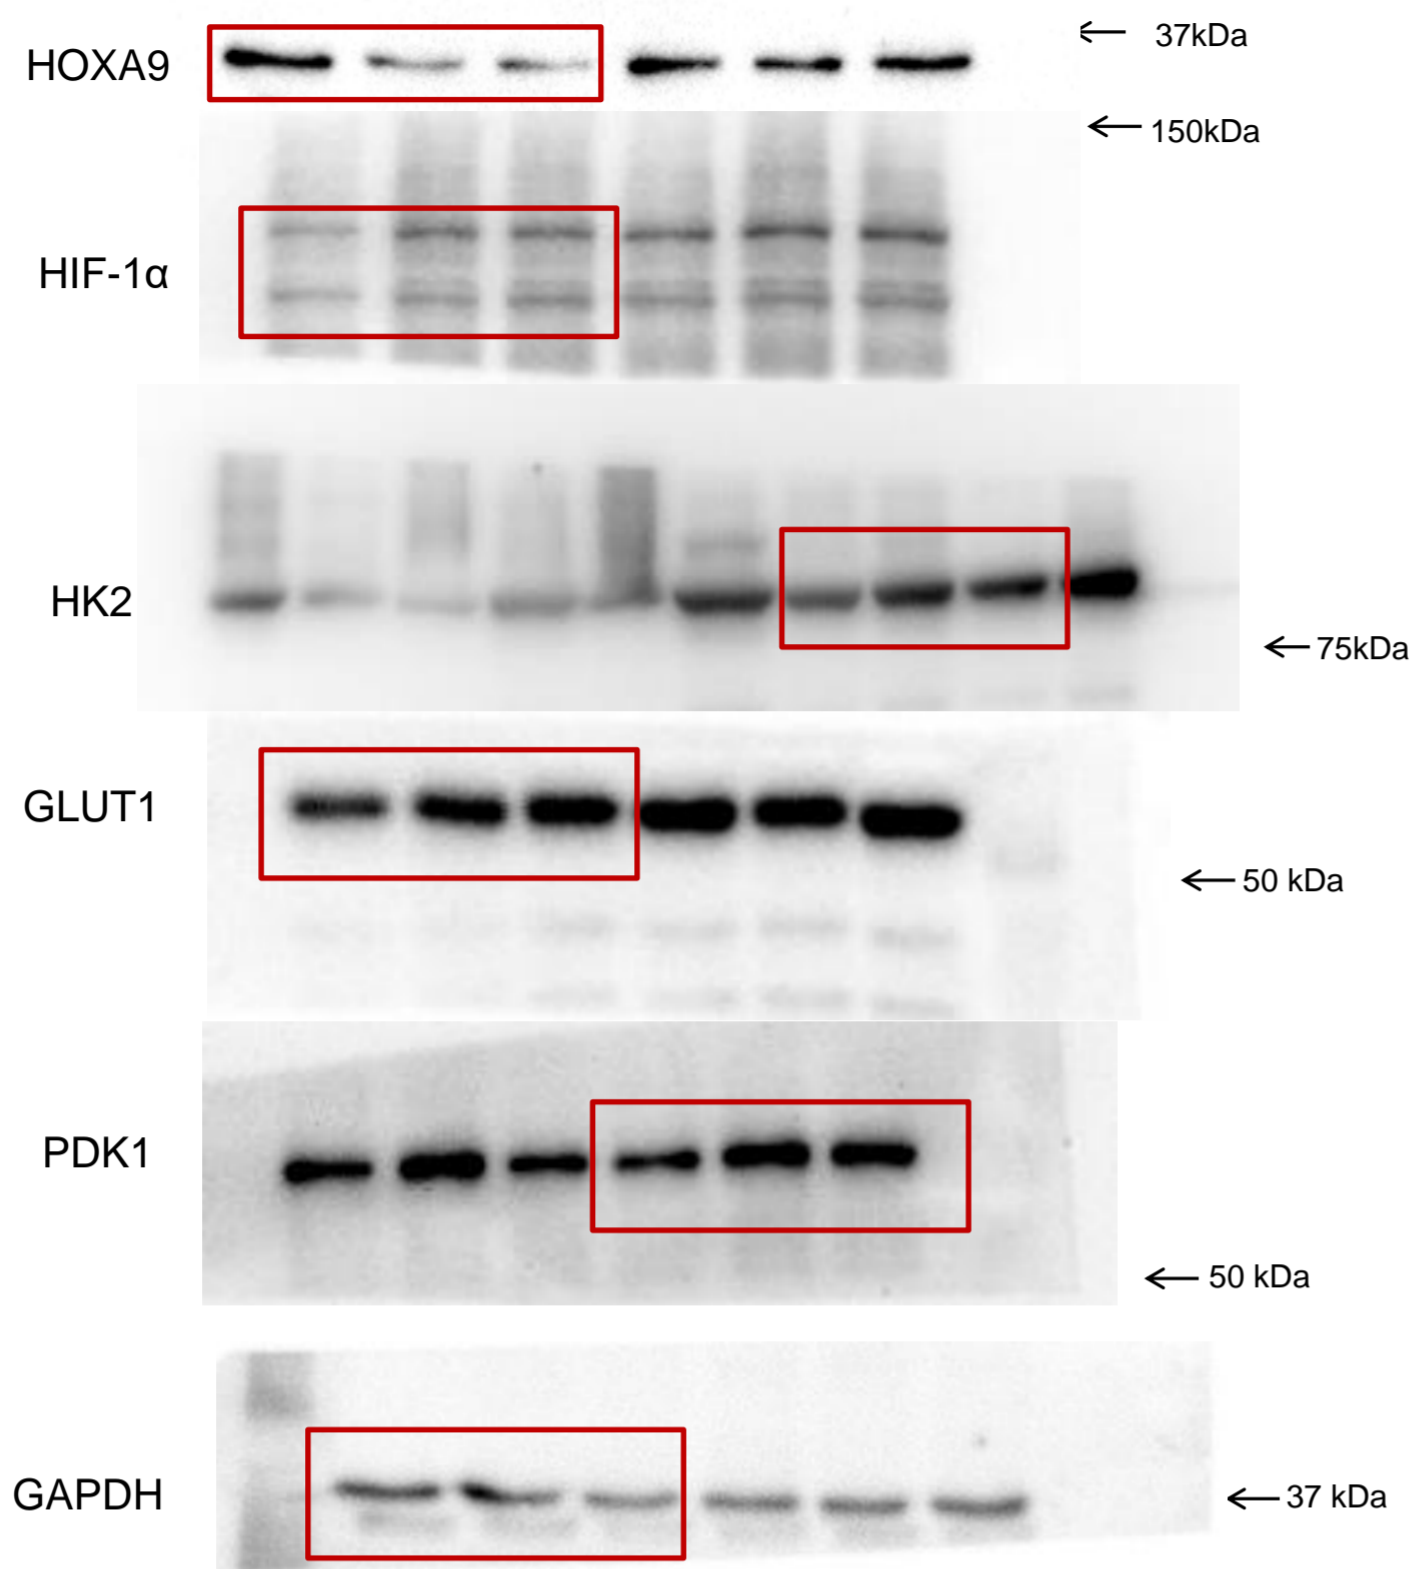

Related to Fig. 5b

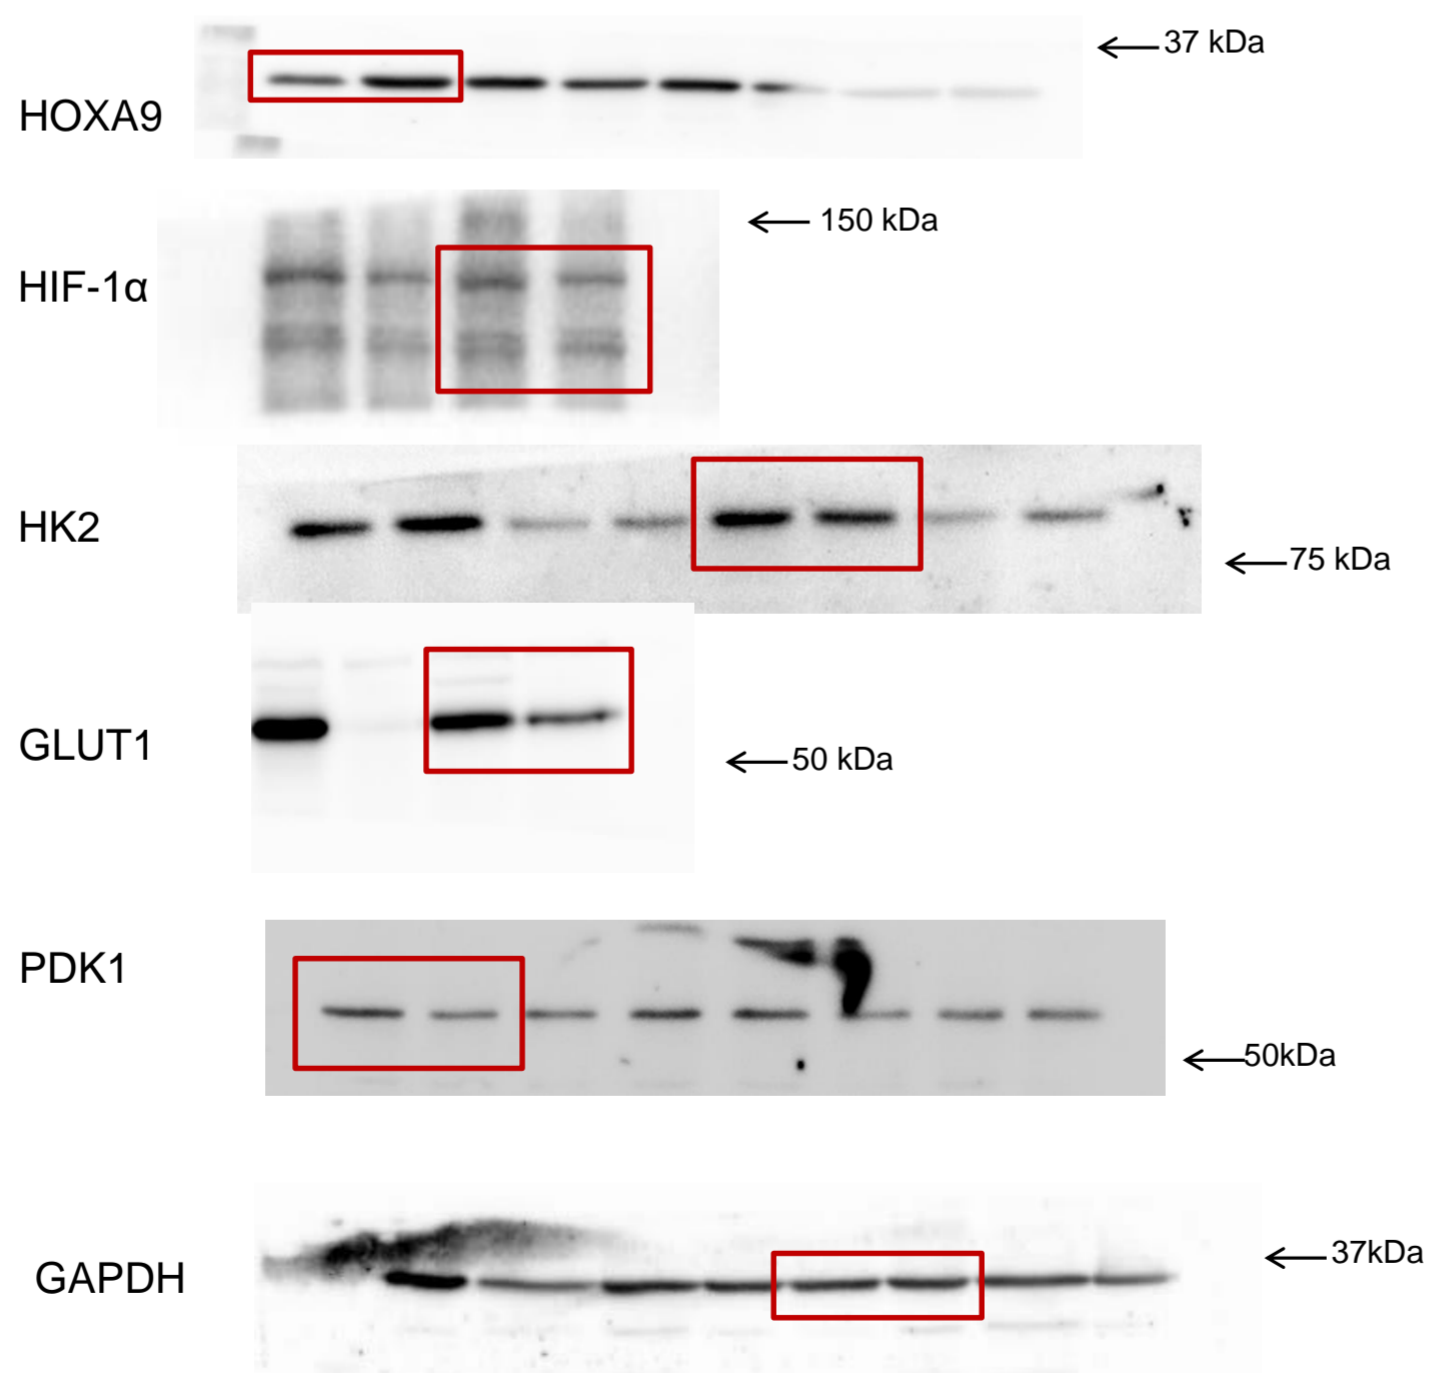

**Supplementary Figure 15 (continued). Uncropped images of blots and gels with size markers are presented. Reference to the original figures is presented for each blot or gel.**

Related to Fig. 5d

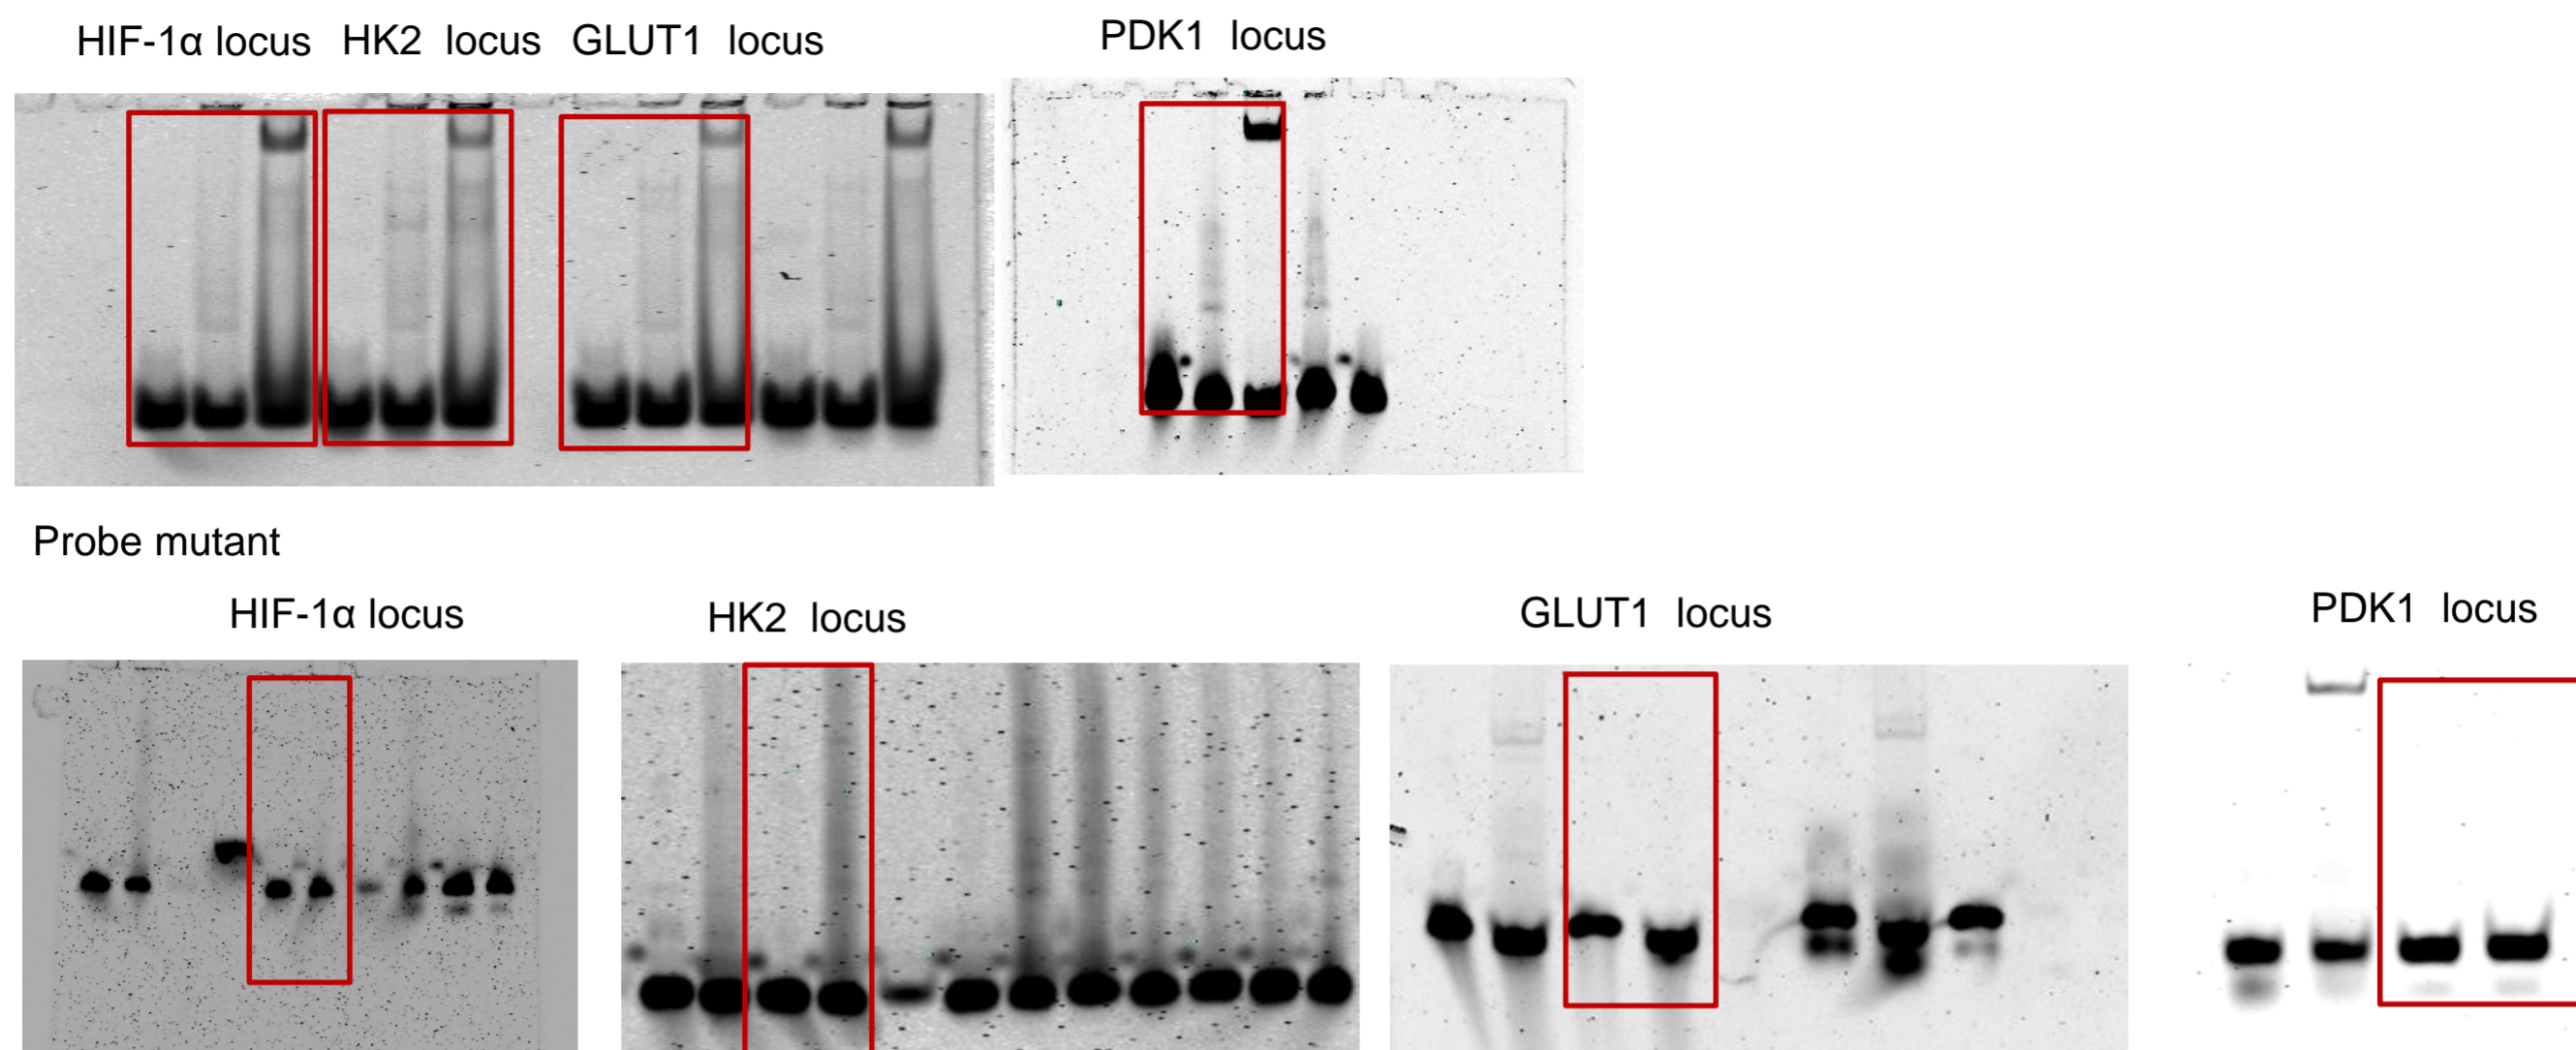

Related to Fig. 6b

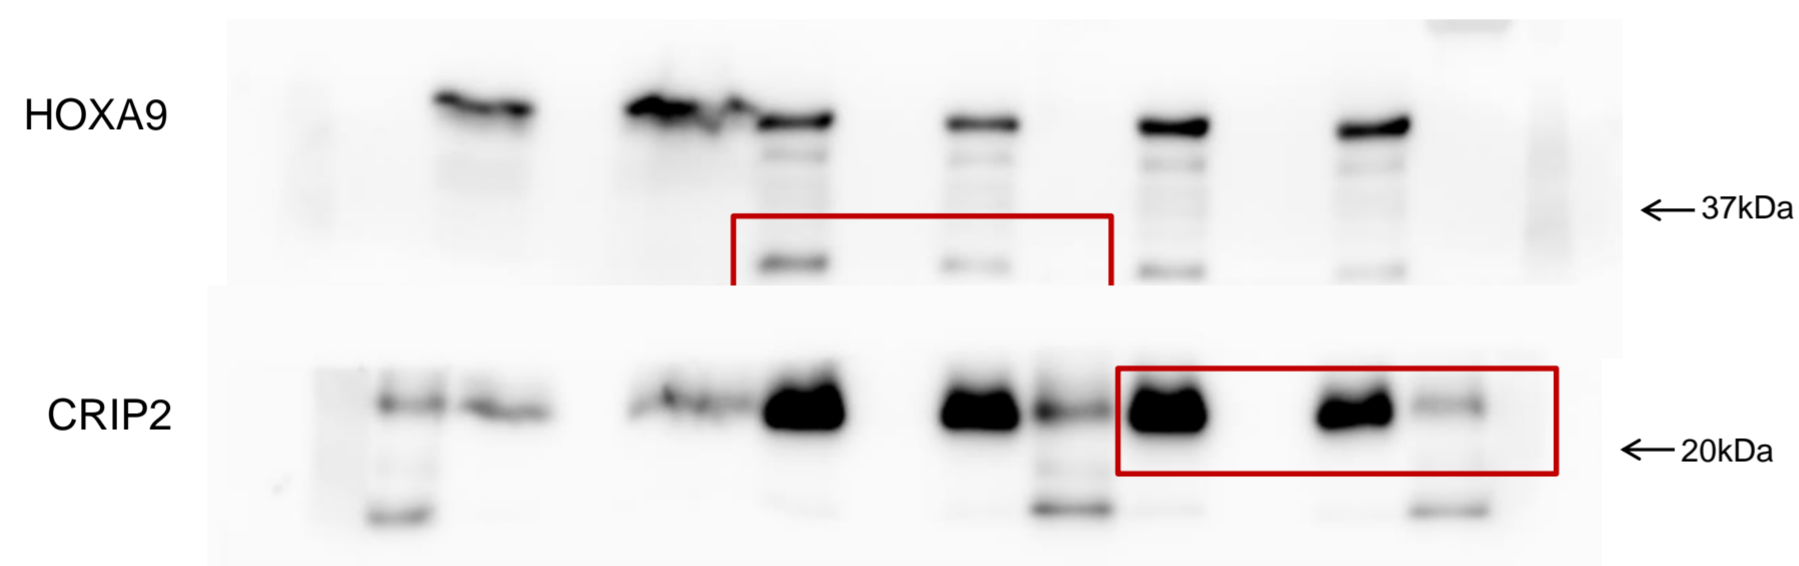

Related to Fig. 6c

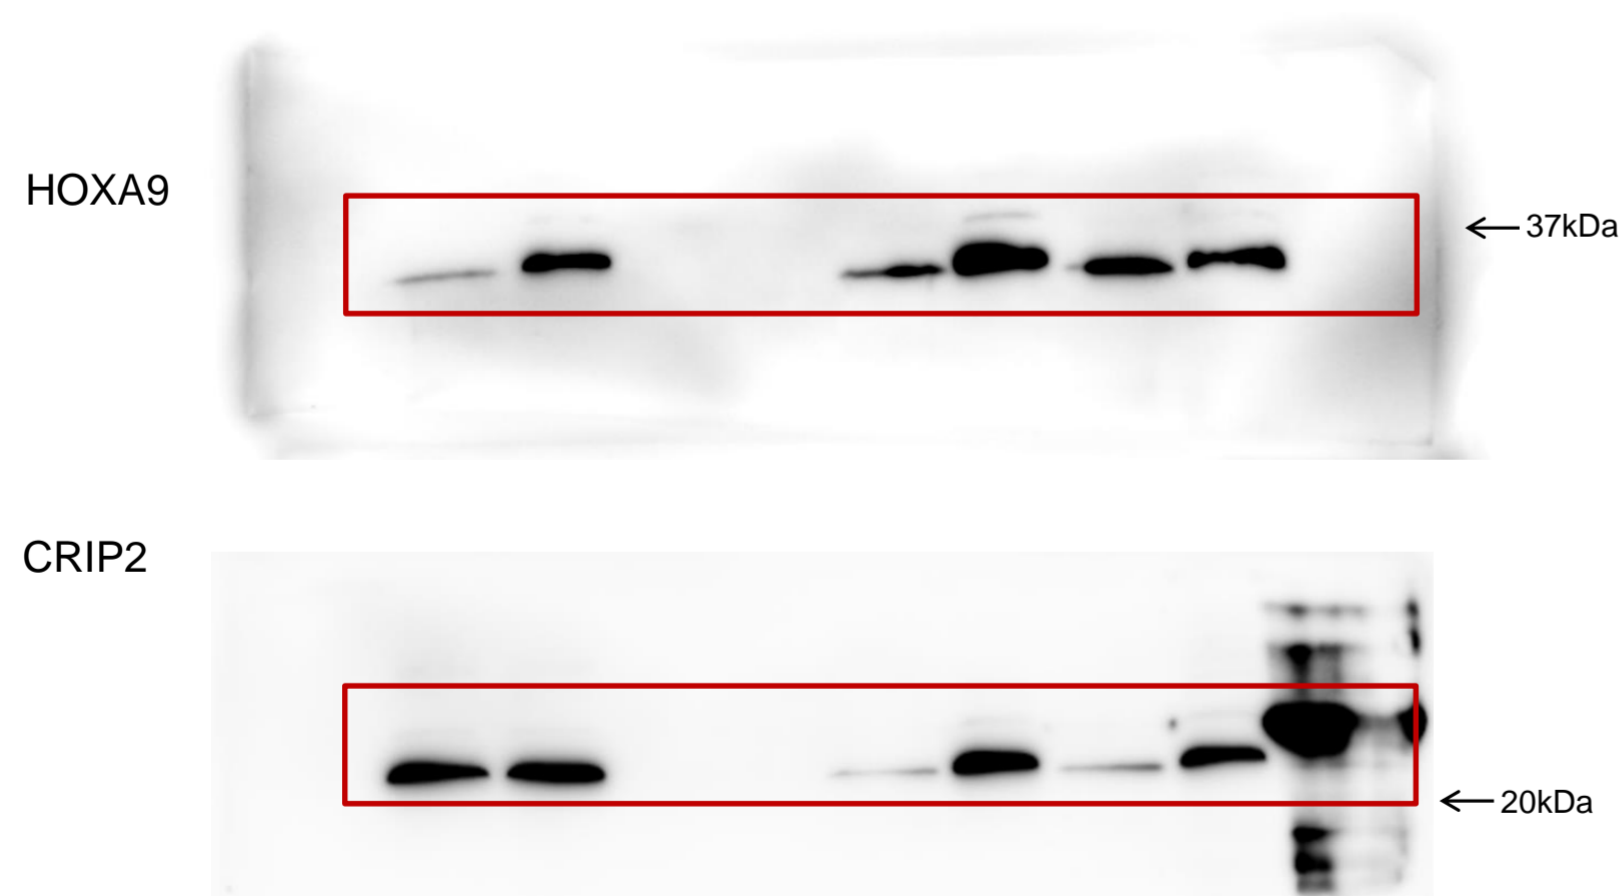

**Supplementary Figure 15 (continued). Uncropped images of blots and gels with size markers are presented. Reference to the original figures is presented for each blot or gel.**

Related to Fig. 7a

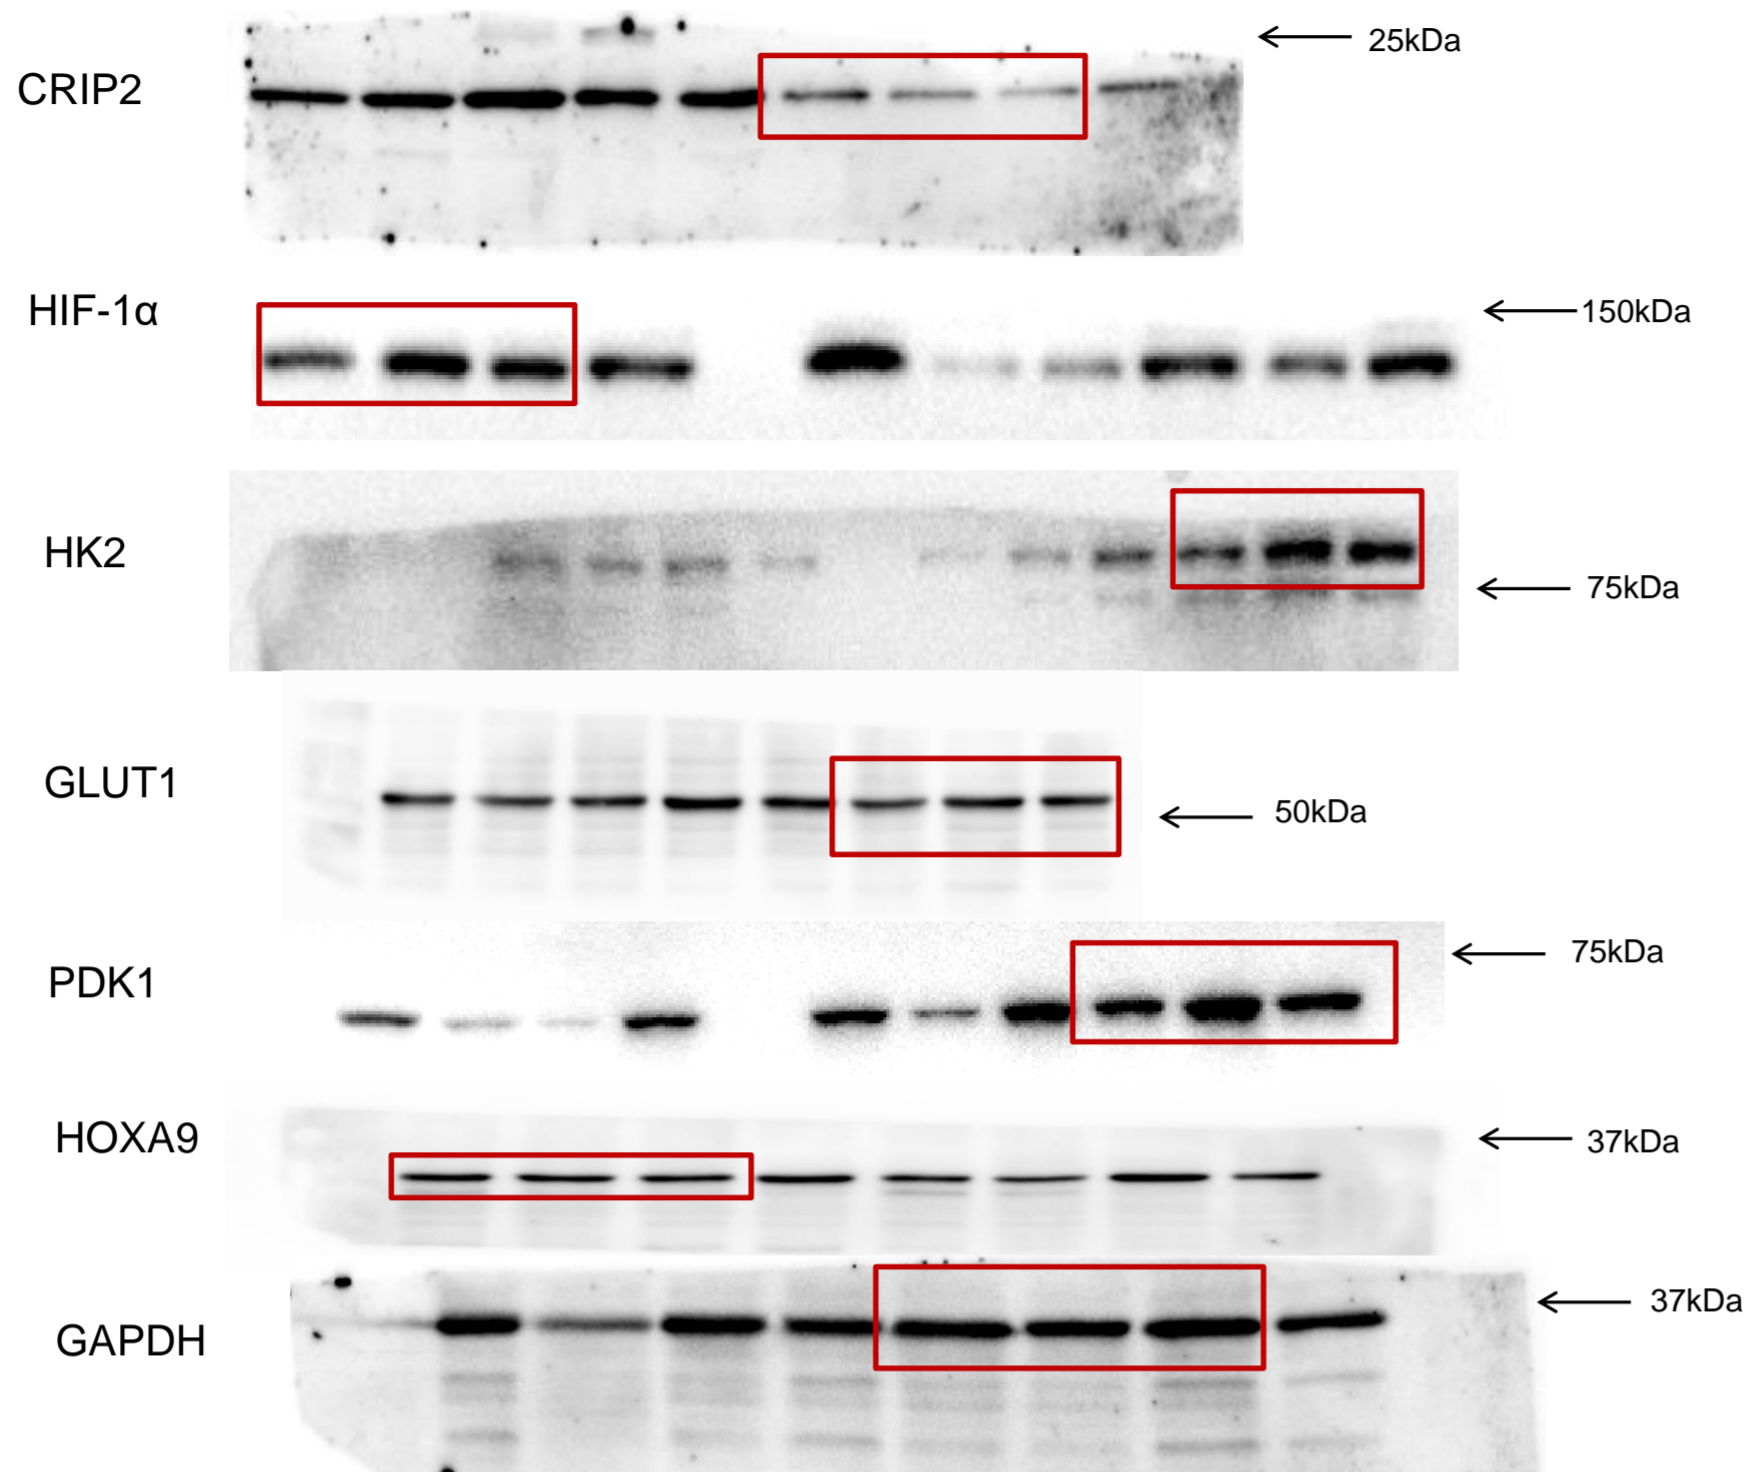

Related to Fig. 7g

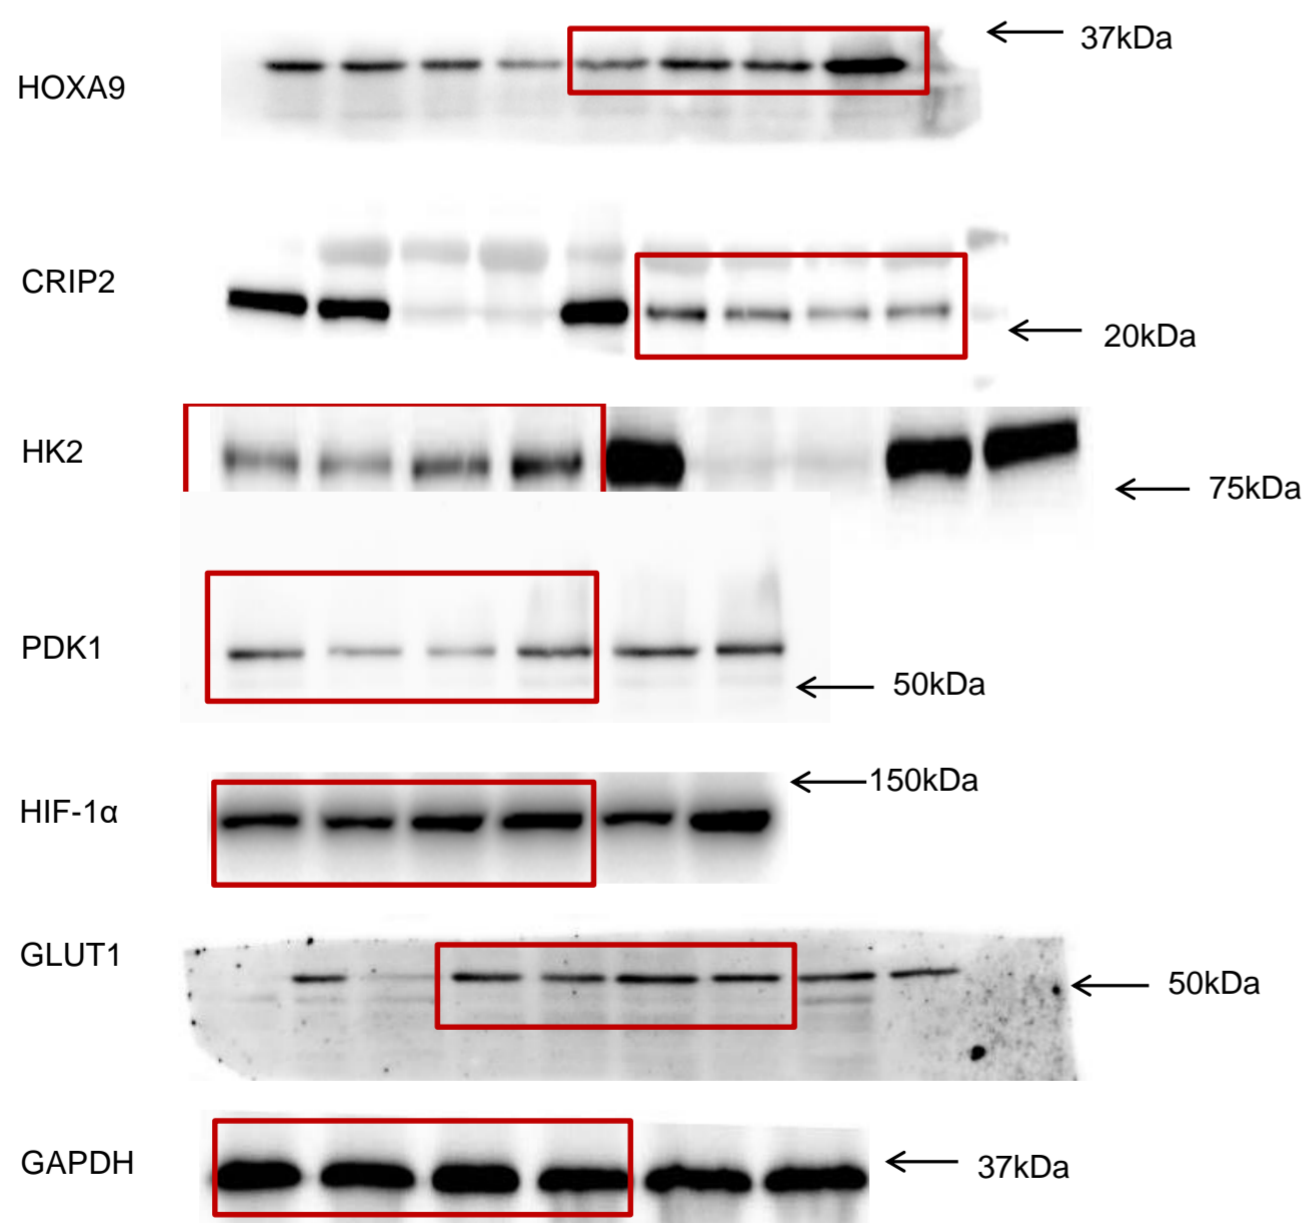

**Supplementary Figure 15 (continued). Uncropped images of blots and gels with size markers are presented. Reference to the original figures is presented for each blot or gel.**

Related to Fig. 8d

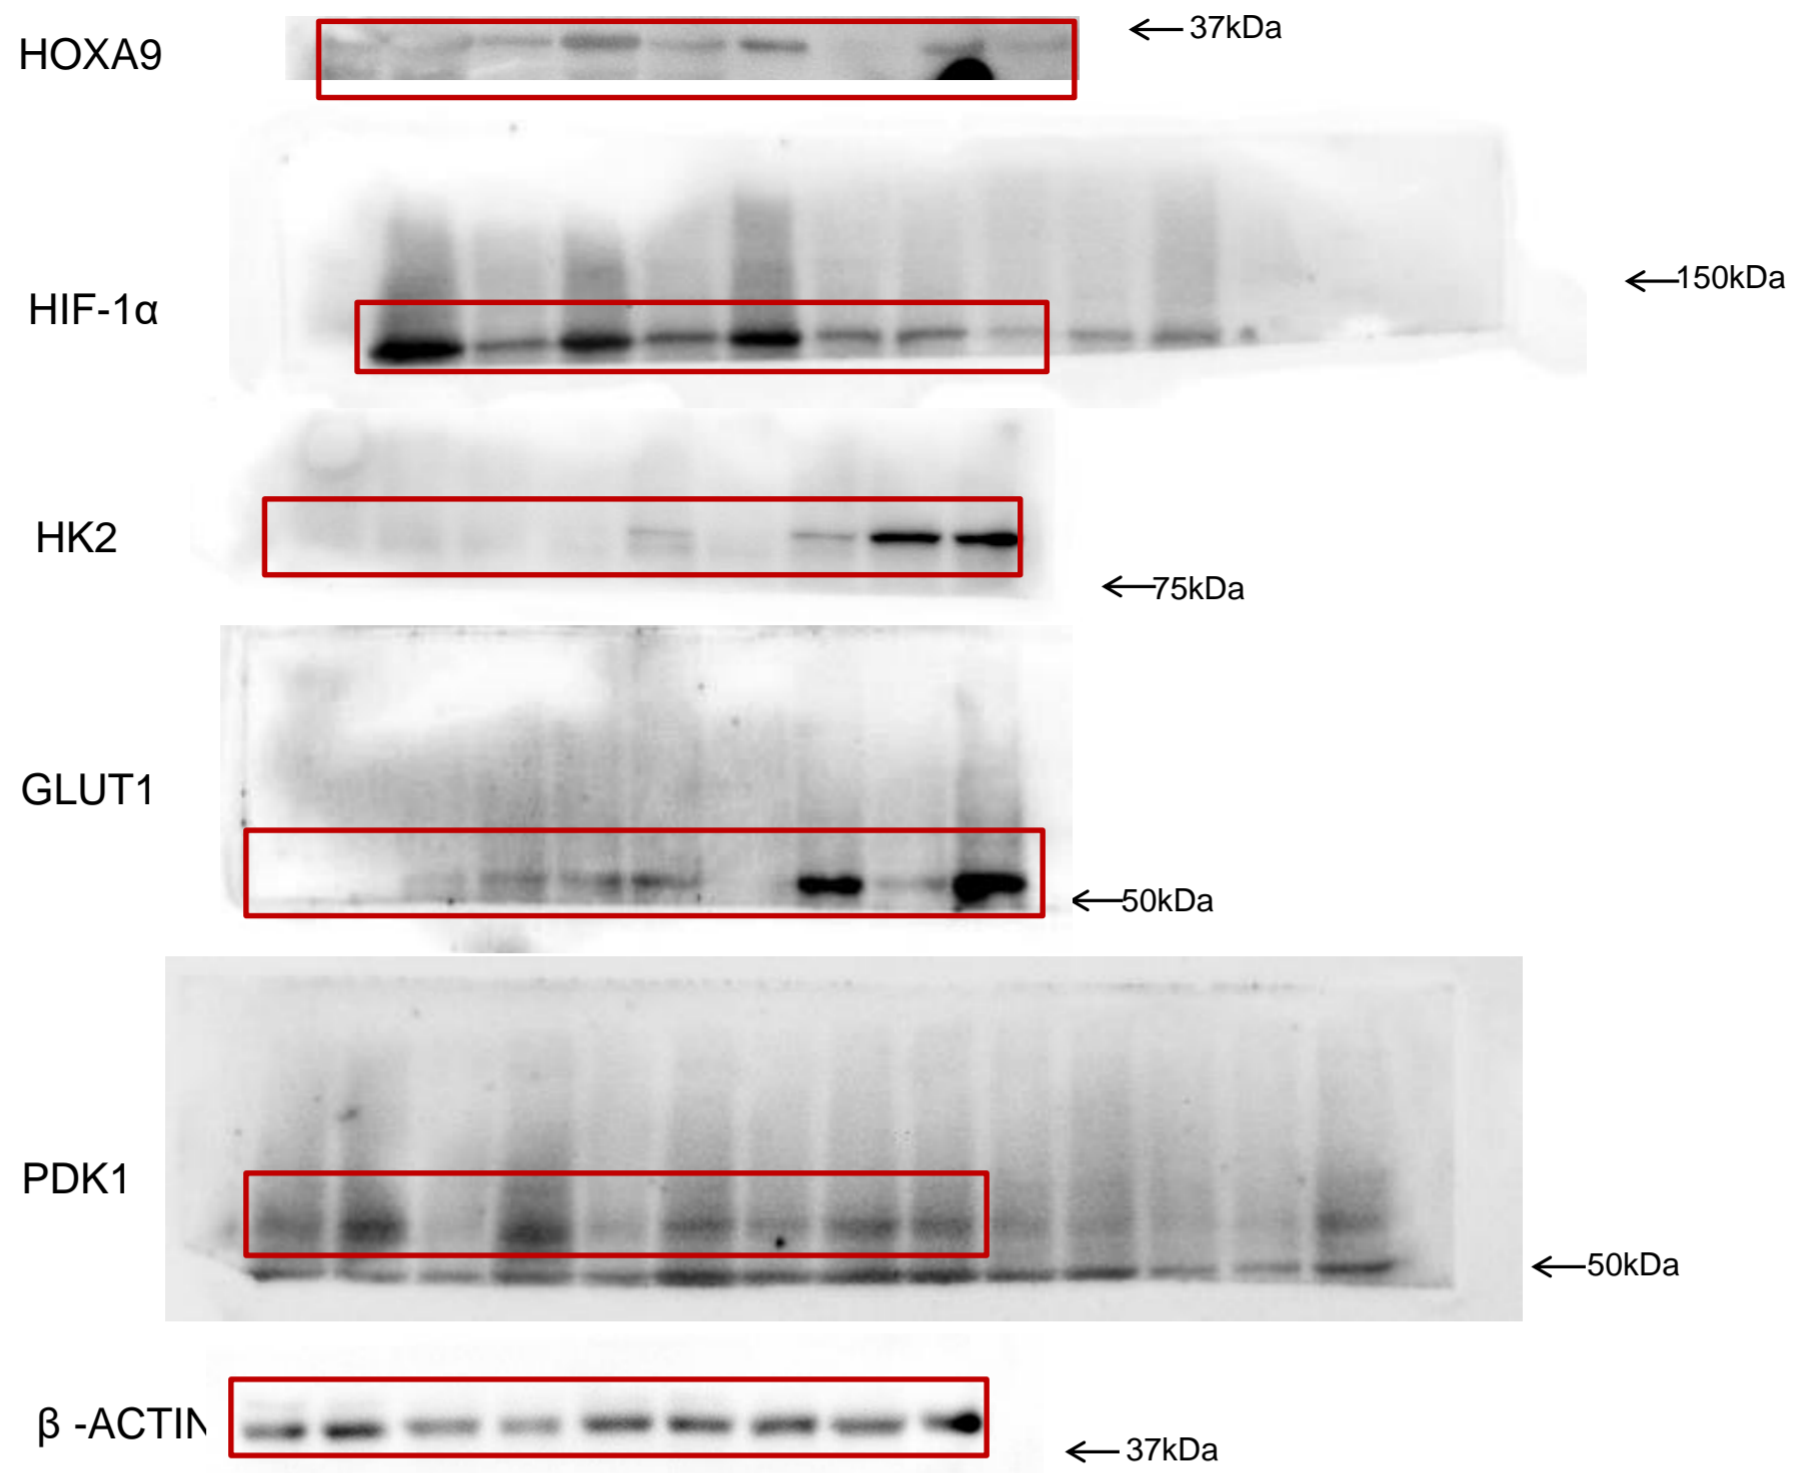

Related to Supplementary Fig. 5b

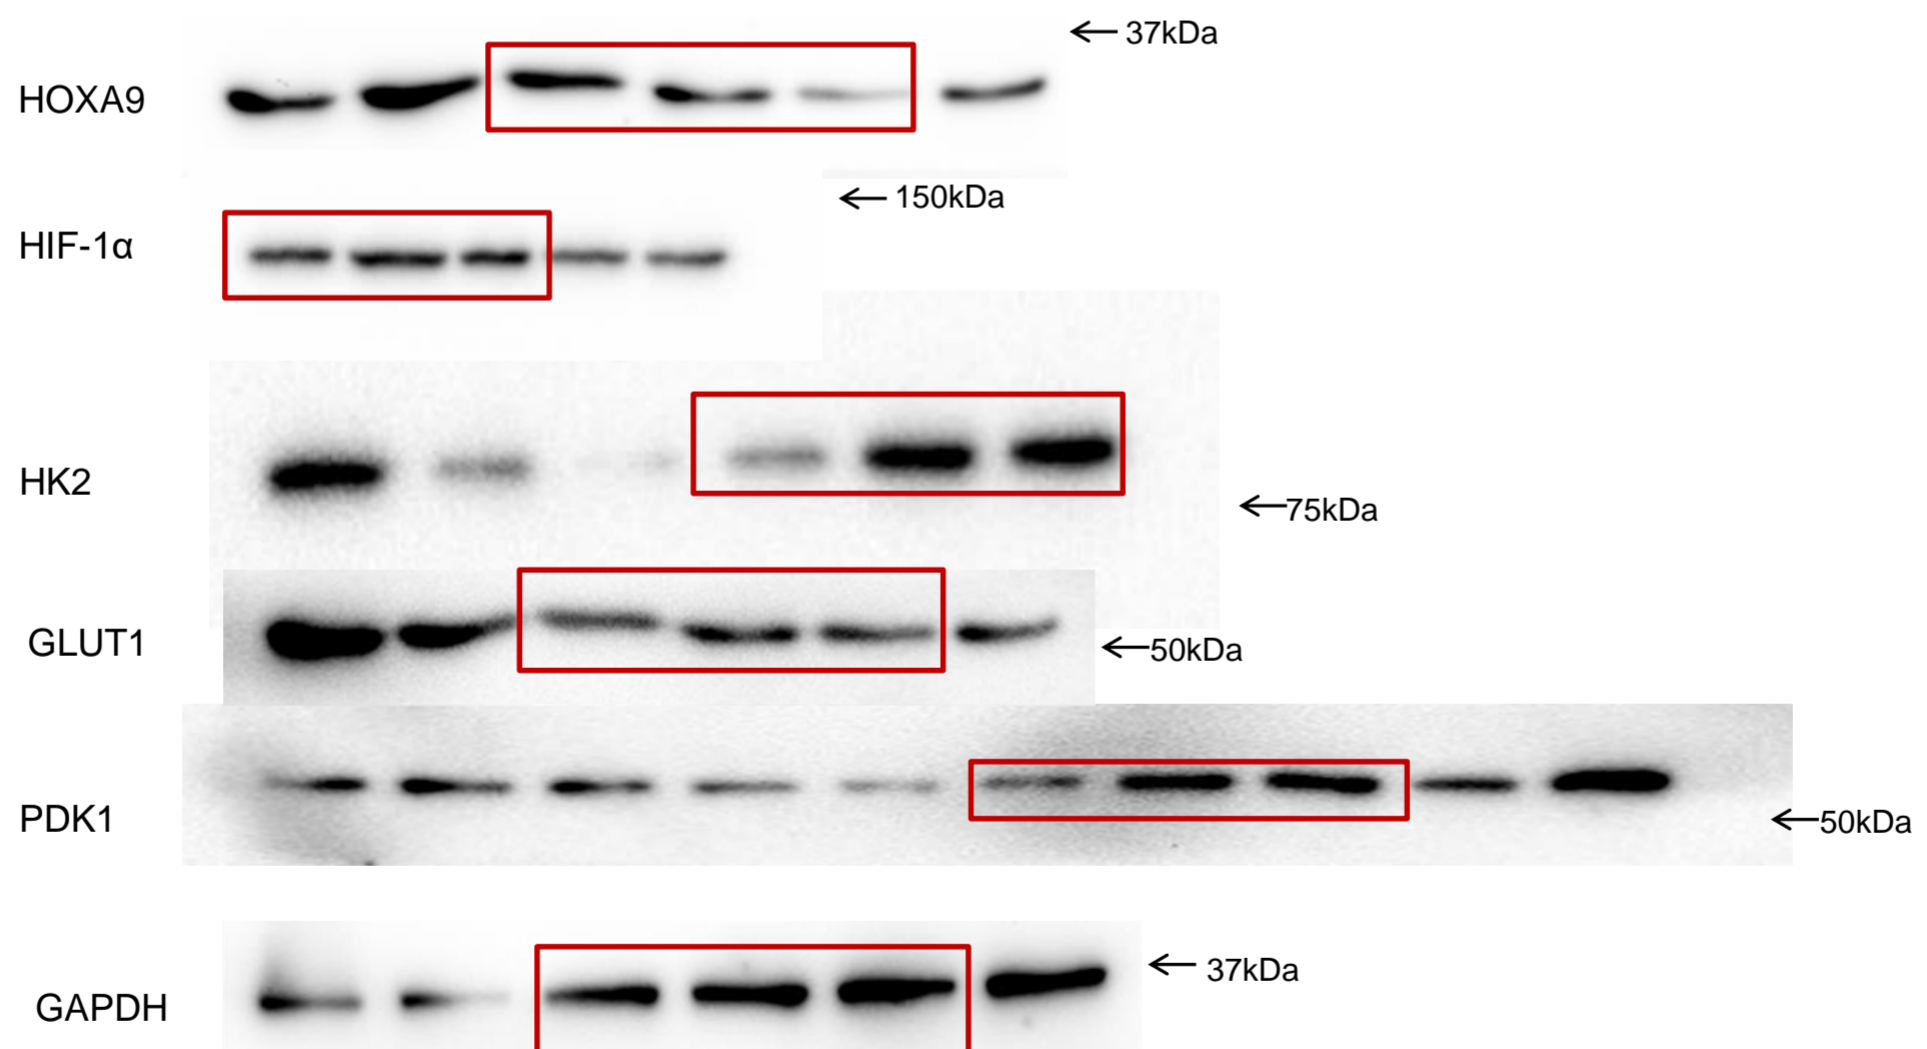

**Supplementary Figure 15 (continued). Uncropped images of blots and gels with size markers are presented. Reference to the original figures is presented for each blot or gel.**

Related to Supplementary Fig. 6b

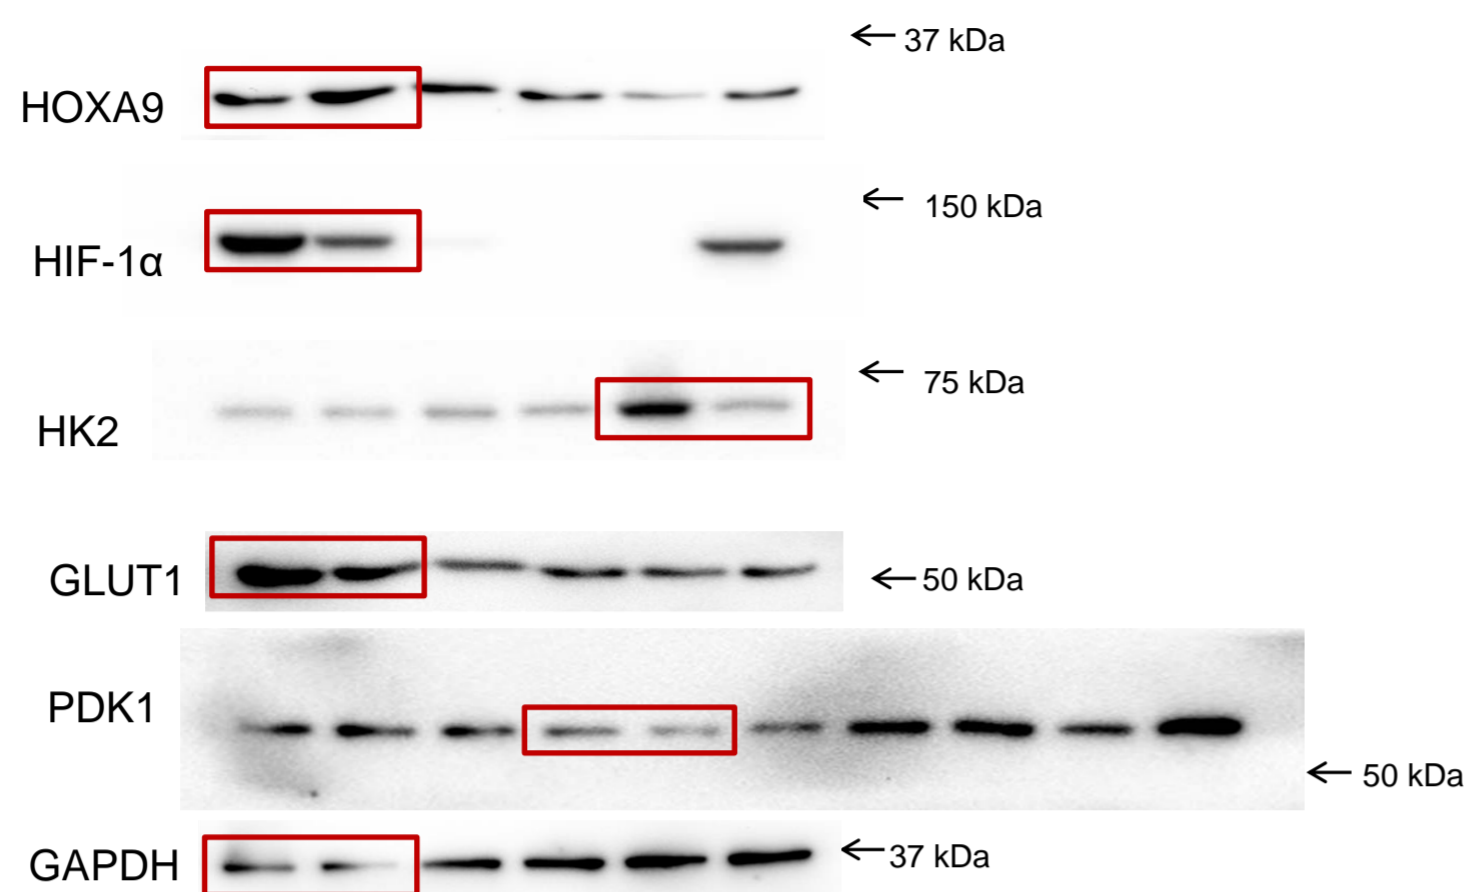

Related to Supplementary Fig. 7b

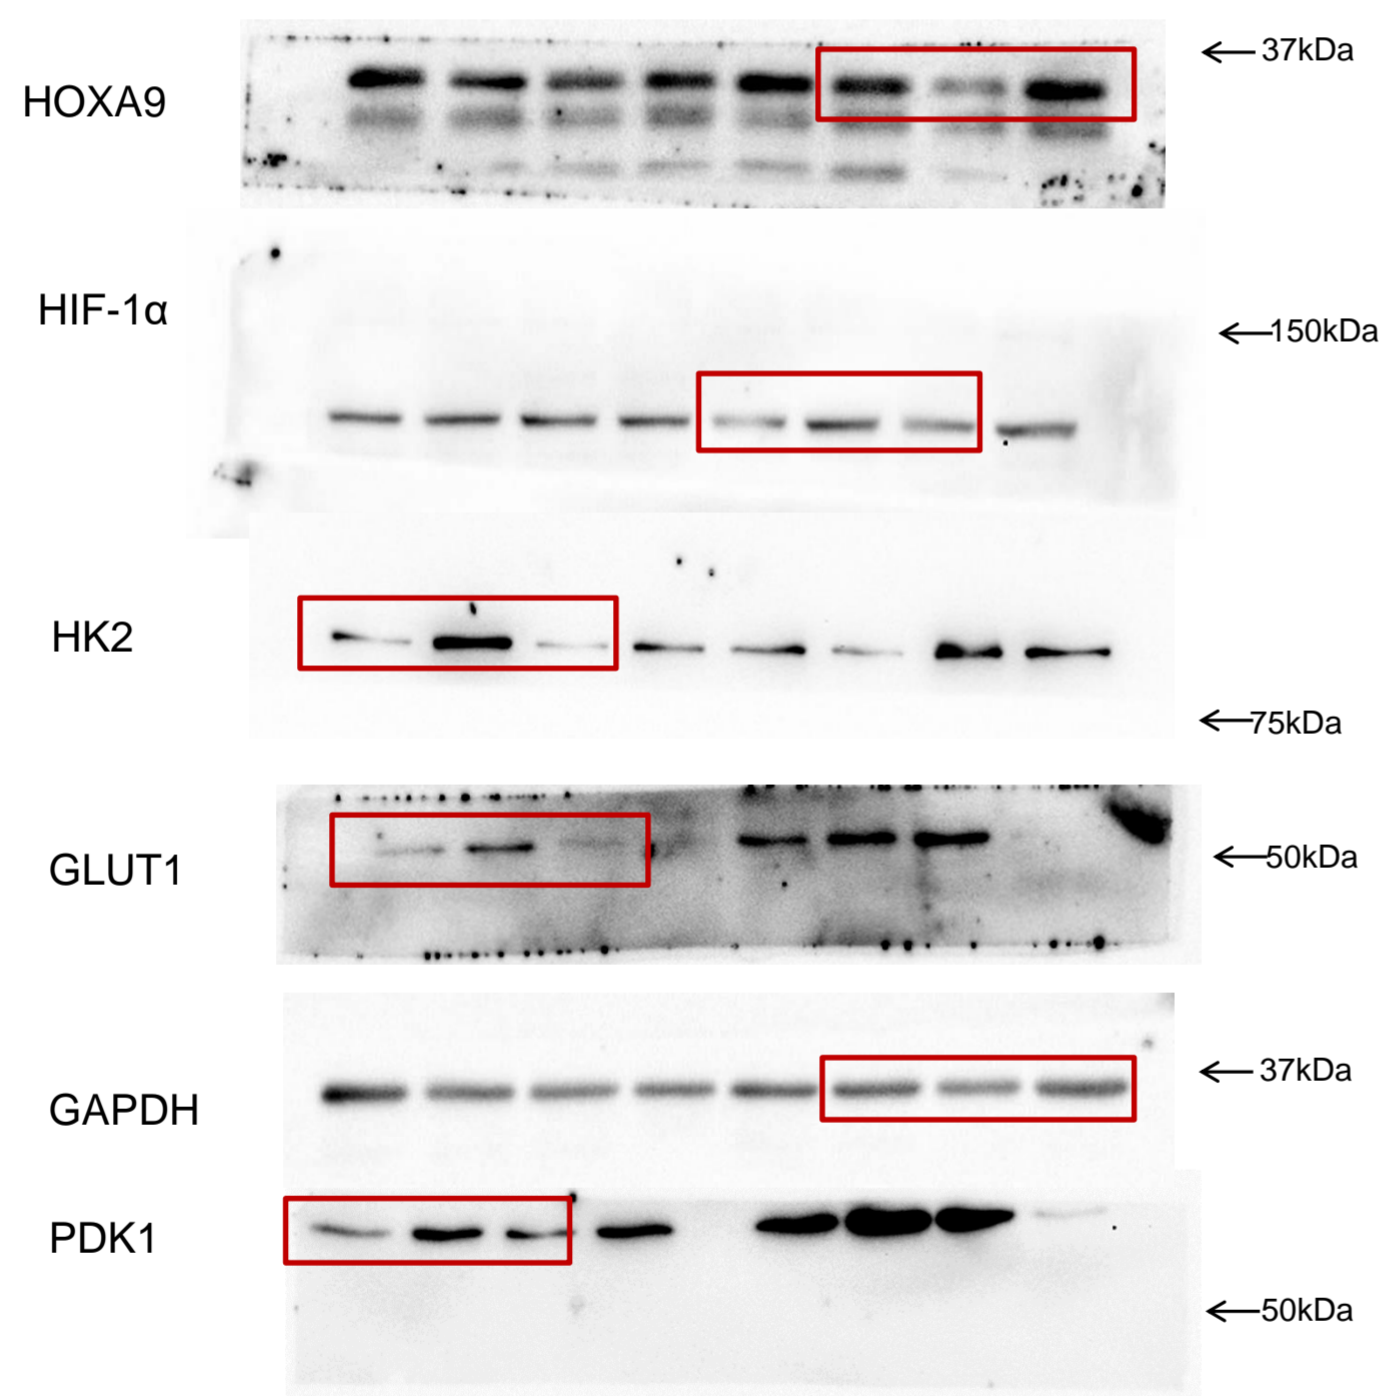

**Supplementary Figure 15 (continued). Uncropped images of blots and gels with size markers are presented. Reference to the original figures is presented for each blot or gel.**

Related to Supplementary Fig. 13d

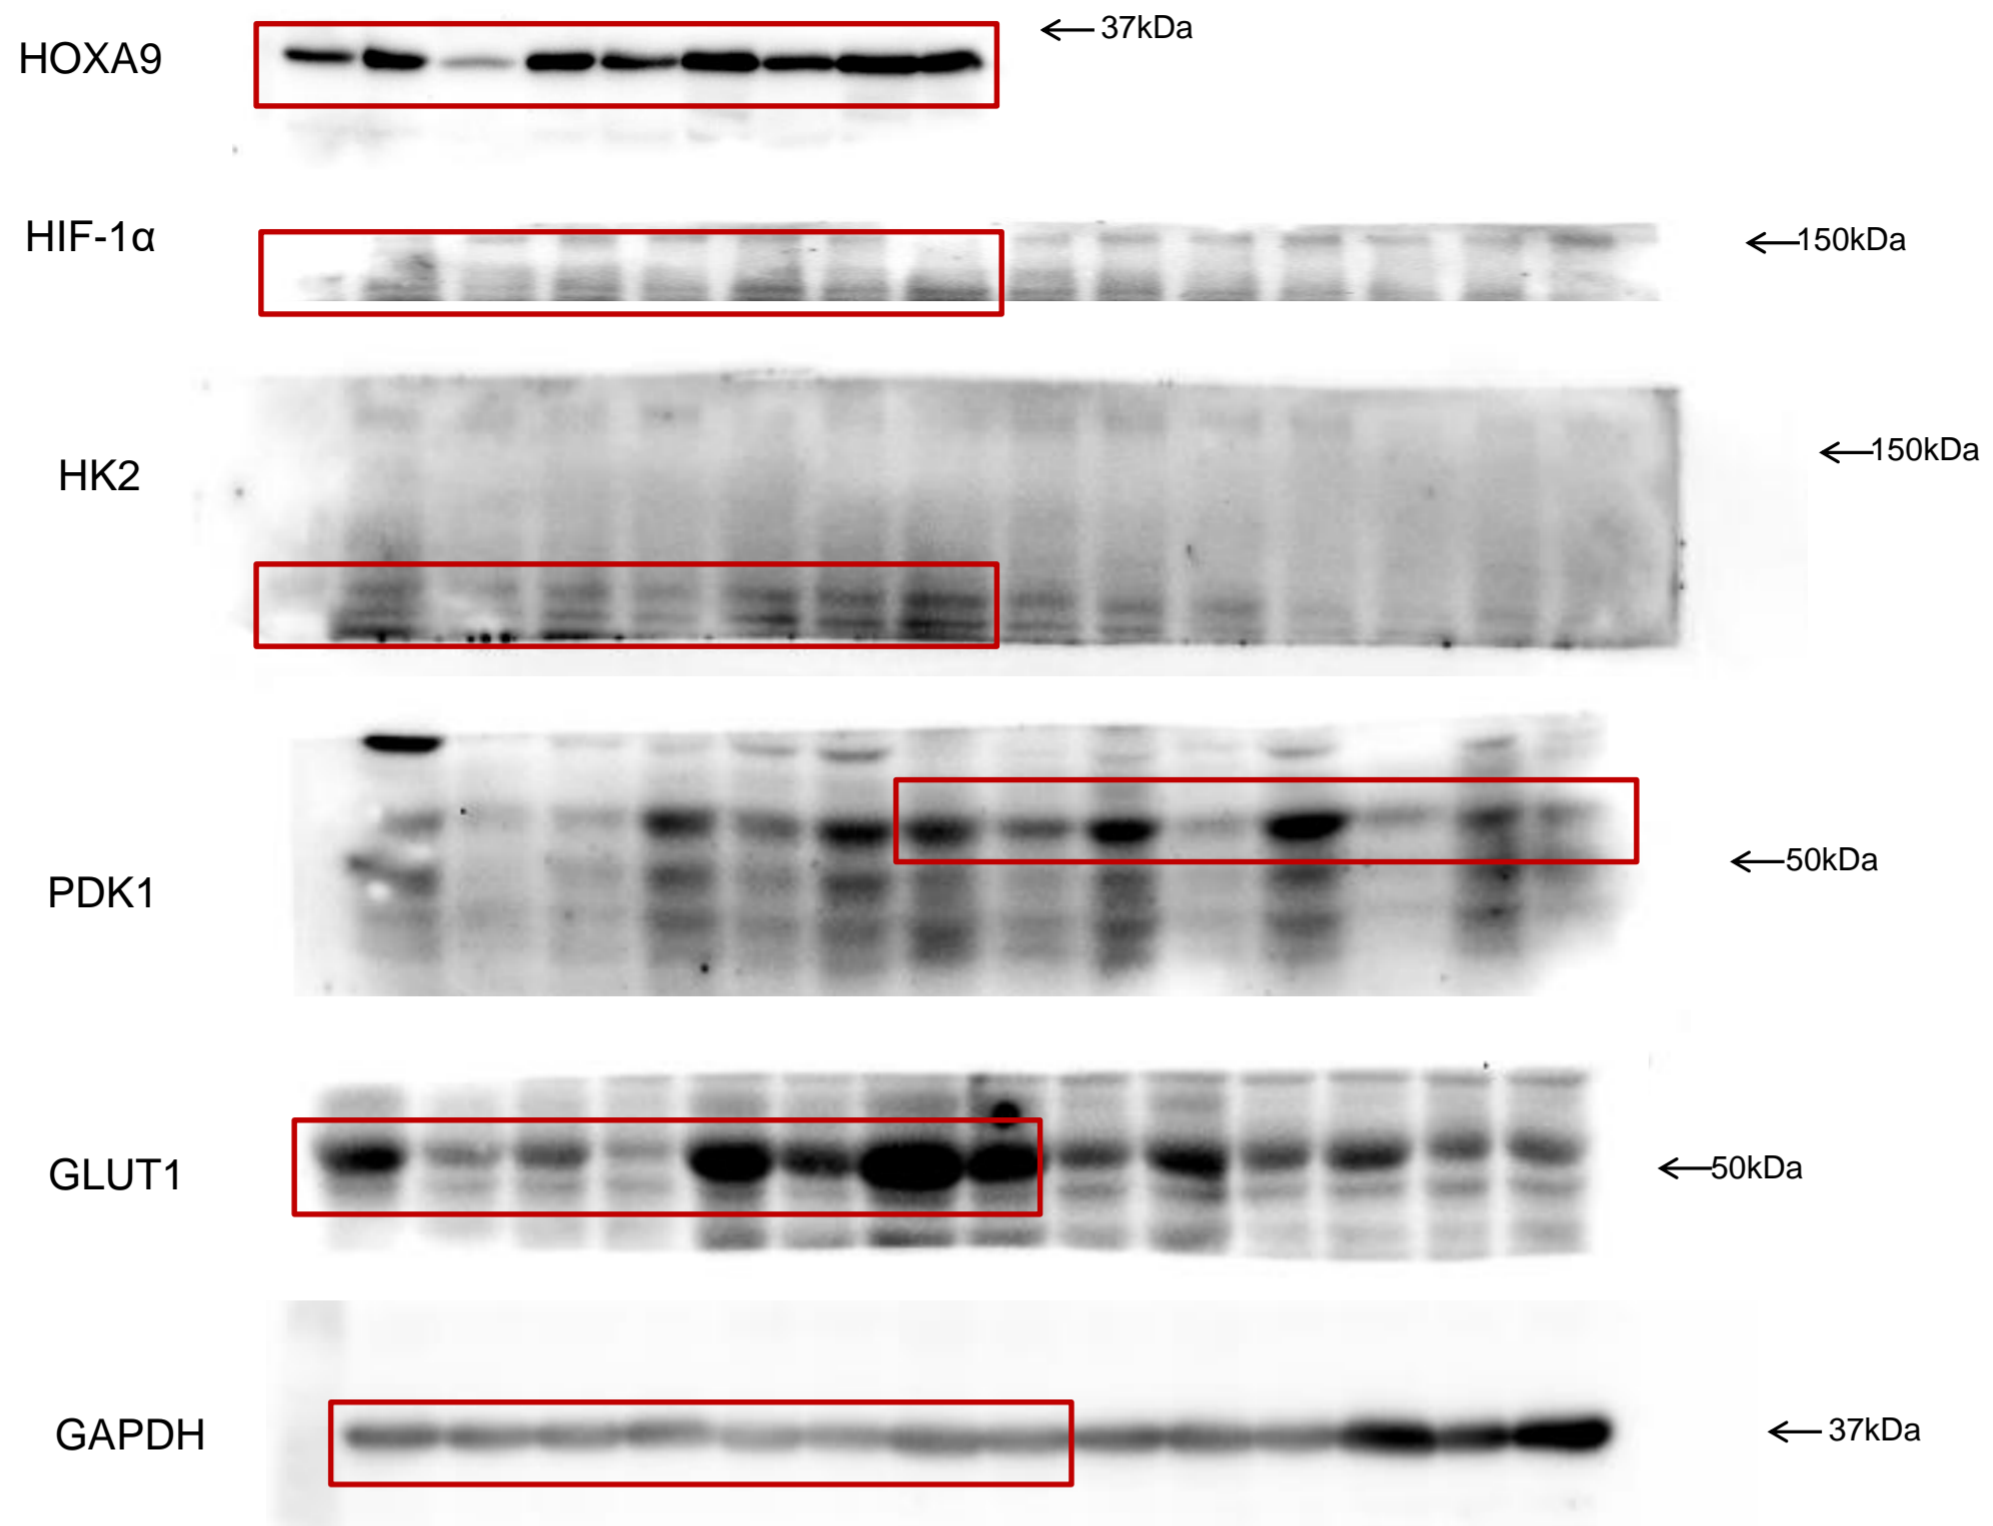

**Supplementary Figure 15 (continued). Uncropped images of blots and gels with size markers are presented. Reference to the original figures is presented for each blot or gel.**

Supplementary Table 1 Co-IP protein list of HOXA9 identified by mass spectrometry

| Accession | Gene name | Description                                                 | IgG | HOXA9 |
|-----------|-----------|-------------------------------------------------------------|-----|-------|
| Q15323    | KRT31     | Keratin, type I cuticular Ha1                               | -   | +     |
| Q14525    | KRT33B    | Keratin, type I cuticular Ha3-II                            | -   | +     |
| O76009    | KRT33A    | Keratin, type I cuticular Ha3-I                             | -   | +     |
| O43790    | KRT86     | Keratin, type II cuticular Hb6                              | -   | +     |
| P78386    | KRT85     | Keratin, type II cuticular Hb5                              | -   | +     |
| P68431    | HIST1H3C  | Histone H3.1                                                | -   | +     |
| P84243    | H3F3A     | histone H3.3                                                | -   | +     |
| P01876    | IGHA1     | Ig alpha-1 chain C region                                   | -   | +     |
| P01860    | IGHG3     | Ig gamma-3 chain C region                                   | -   | +     |
| P35579-1  | MYH9      | Myosin-9                                                    | -   | +     |
| Q7Z3E1    | TIPARP    | TCDD-inducible poly [ADP-ribose] polymerase                 | -   | +     |
| P61626    | LYZ       | lysozyme c                                                  | -   | +     |
| O43426    | SYNJ1     | Synaptojanin-1                                              | -   | +     |
| P58107    | EPPK1     | epiplakin                                                   | -   | +     |
| Q8N841-1  | TTLL6     | Tubulin polyglutamylase ttl6                                | -   | +     |
| P30101    | PDIA3     | Protein disulfide-isomerase A3                              | -   | +     |
| Q15645    | TRIP13    | Pachytene checkpoint protein 2 homolog                      | -   | +     |
| P14618    | PKM       | Pyruvate kinase PKM                                         | -   | +     |
| P07900-2  | HSP90AA1  | Isoform 2 of Heat shock protein HSP 90-alpha                | -   | +     |
| P63104-1  | YWHAZ     | 14-3-3 protein zeta/delta                                   | -   | +     |
| Q96Q05-2  | TRAPPC9   | Isoform 2 of Trafficking protein particle complex subunit 9 | -   | +     |
| Q9NV31    | IMP3      | U3 small nucleolar ribonucleoprotein protein IMP3           | -   | +     |
| Q13671    | RIN1      | ras and Rab interactor 1                                    | -   | +     |
| O43918-1  | AIRE      | autoimmune regulator                                        | -   | +     |
| P60174    | TPI1      | Triosephosphate isomerase                                   | -   | +     |
| Q14240-2  | EIF4A2    | Isoform 2 of Eukaryotic initiation factor 4A-II             | -   | +     |
| P05089-2  | ARG1      | Isoform 2 of Arginase-1                                     | -   | +     |
| Q96QA5    | GSDMA     | gasdermin-A                                                 | -   | +     |
| P52943-2  | CRIP2     | Isoform 2 of Cysteine-rich protein 2                        | -   | +     |
| P02545    | lamin A/C | Prelamin-A/C                                                | -   | +     |
| P02788    | LTF       | Lactotransferrin                                            | -   | +     |
| P62913    | RPL11     | 60S ribosomal protein L11                                   | -   | +     |
| Q15828    | CST6      | Cystatin-M                                                  | -   | +     |



**Supplementary Table 2 Oligonucleotides used for Cloning, qRT-PCR, ChIP-PCR, EMSA and knockdown experiments**

| <b>Name</b>                                 | <b>Sequence</b>                                         |
|---------------------------------------------|---------------------------------------------------------|
| <b>For qRT-PCR</b>                          |                                                         |
| hGAPDH_FP                                   | GGATATTGTTGCCATCAATGACC                                 |
| hGAPDH_RP                                   | AGCCTTCTCCATGGTGGTGAAGA                                 |
| hHOXA9_FP                                   | GCTTGTGGTTCTCCTCCAGTTG                                  |
| hHOXA9_RP                                   | TCCCTGGTGAGGTACATGTTGAA                                 |
| hHIF-1 $\alpha$ _FP                         | TCCGATGGAAGCACTAGACAAAG                                 |
| hHIF-1 $\alpha$ _RP                         | TGACAACCTGATCGAAGGAACGTAA                               |
| hHK2_FP                                     | CGTCTACAAGAAACACCCCCATT                                 |
| hHK2_RP                                     | ACCTCGCTCCATTTCTACCTTCA                                 |
| hGLUT1_FP                                   | GCTTCTCCAACCTGGACCTCAAAT                                |
| hGLUT1_RP                                   | TCCTCGGGTGTCTTGTCACTTT                                  |
| hPDK1_FP                                    | GGACAAAAGTGCTGAGGATGCTA                                 |
| hPDK1_RP                                    | GCGACTCATGTAGAATCGATCCA                                 |
| <b>For cloning (pMIR-report constructs)</b> |                                                         |
| hHOXA9_3UTR_FP                              | CTAGTTATAAGAAAAAGGAAAAGTTGAGGGGGGGGCATTAGTGCTGATAGGAGCT |
| hHOXA9_3UTR_RP                              | CCTATCAGCACTAATGCCCCCCCTCAACTTTTCTTTTTCTTATAA           |
| hHOXA9_3UTR_mut_FP                          | CTAGTTATAAGAAAAAGGAAAAGTTGAGGGGGGACTGCGAGTGCTGATAGGAGCT |
| hHOXA9_3UTR_mut_RP                          | CCTATCAGCACTGCGAGTCCCCCTCAACTTTTCTTTTTCTTATAA           |
| <b>For ChIP-PCR</b>                         |                                                         |
| HIF-1 $\alpha$ _HOXA9 ChIP_FP               | CGTGCAGGTTTTGTTTCGTTTTA                                 |
| HIF-1 $\alpha$ _HOXA9 ChIP_RP               | TGTCACGAGAACGCAGATATTATAAATG                            |
| HK2_HOXA9 ChIP_FP                           | GGTCAGATGCACGGTCTGTTTTA                                 |
| HK2_HOXA9 ChIP_RP                           | CAAATCTTTTTCTTTCCAGTTGTCT                               |
| GLUT1_HOXA9 ChIP_FP                         | TGGAATTGACACCTCTCCTGATA                                 |
| GLUT1_HOXA9 ChIP_RP                         | CAGGCTGGTCTTGAACCTCTTGAC                                |
| PDK1_HOXA9 ChIP_FP                          | TACCCGTTACACTTTCTAAAACCAACA                             |
| PDK1_HOXA9 ChIP_RP                          | CCAATCTGCGTTTTCCCTGAA                                   |
| HK2_HIF-1 $\alpha$ ChIP_FP                  | GAGGGTTGAGGAGCTGCATTTAG                                 |
| HK2_HIF-1 $\alpha$ ChIP_RP                  | TGAACTCCTGGGCTCAAGCA                                    |
| GLUT1_HIF-1 $\alpha$ ChIP_FP                | TAGCAACAGCGAGCGTGCCG                                    |
| GLUT1_HIF-1 $\alpha$ ChIP_RP                | CCCCGTCGTTTGGTCTCCT                                     |
| PDK1_HIF-1 $\alpha$ ChIP_FP                 | TTGCATATAGATTGAGGTCTCCTGTCT                             |
| PDK1_HIF-1 $\alpha$ ChIP_RP                 | CGTGACACAGCCTCAGGAAGTC                                  |
| <b>EMSA probes</b>                          |                                                         |
| HOXA9 motif_HIF-1 $\alpha$ locus_top        | CAGCAGATATTATAAAACGCGC                                  |
| HOXA9 motif_HIF-1 $\alpha$ locus_bottom     | GCGCGTTTTATAATATCTGCTG                                  |
| HOXA9 motif_mut_HIF-1 $\alpha$ locus_top    | CAGCAGATAGGGGAAAACGCGC                                  |
| HOXA9 motif_mut_HIF-1 $\alpha$ locus_bottom | GCGCGTTTTCCCTATCTGCTG                                   |
| HOXA9 motif_HK2 locus_top                   | CAGCAGGTTTTATAGGACGCGC                                  |
| HOXA9 motif_HK2 locus_bottom                | GCGGTCCTATAAAACCTGCTG                                   |
| HOXA9 motif_mut_HK2 locus_top               | CAGCAGGTTGGGGAGGACGCGC                                  |
| HOXA9 motif_mut_HK2 locus_bottom            | GCGGTCCTCCCCAACCTGCTG                                   |
| HOXA9 motif_Glut1 locus_top                 | CAGCAGCAAATAAATAACGCGC                                  |
| HOXA9 motif_Glut1 locus_bottom              | GCGCGTTATTTATTTGCTGCTG                                  |
| HOXA9 motif_mut_Glut1 locus_top             | CAGCAGCAACCCATAACGCGC                                   |
| HOXA9 motif_mut_Glut1 locus_bottom          | GCGCGTTATGGGTTGCTGCTG                                   |
| HOXA9 motif_PDK1 locus_top                  | CAGCAGGCAGATTGGTGACGCGC                                 |
| HOXA9 motif_PDK1 locus_bottom               | GCGCGTCACCAATCTGCCTGCTG                                 |
| HOXA9 motif_mut_PDK1 locus_top              | CAGCAGGCACCCCGGTGACGCGC                                 |
| HOXA9 motif_mut_PDK1 locus_bottom           | GCGCGTCACCGGGTGCCTGCTG                                  |
| <b>siRNAs oligos for knockdown assays</b>   |                                                         |
| si-HOXA9 #1                                 | CCUCCAGUUGAUAGAGAAA                                     |
| si-HOXA9 #2                                 | CCGGCCUUUUGGCAUAAA                                      |
| si-CRIP2 #1                                 | UGGGCAGCUACAUCUAUGA                                     |
| si-CRIP2 #2                                 | CUGAGAAGGUGACGUCUCU                                     |
