# Supplementary material for: HOXA9 inhibits HIF-1α-mediated glycolysis through interacting with CRIP2 to repress cutaneous squamous cell carcinoma development
Source: PubMed Central journal article supplement (PMC5902613; doi:10.1038/s41467-018-03914-5), 2018-04-16
Supplement: 41467_2018_3914_MOESM3_ESM.pdf [file 41467_2018_3914_MOESM3_ESM.pdf]

## **Description of Additional Supplementary Files**

**File Name: Supplementary Data 1**

**Description:** Differentially-expressed transcripts in response to HOXA9 depletion.

**File Name: Supplementary Data 2**

**Description:** Functional annotation clustering of regulated genes in HOXA9-depleted cells.

**File Name: Supplementary Data 3**

**Description:** KEGG pathway analysis of regulated genes in HOXA9-depleted cells.
